# Supplementary material for: Development and validation of a brief screening instrument for psychosocial risk associated with genetic testing: a pan-Canadian cohort study
Source: PubMed Central journal article supplement — BMJ Open. 2013 Mar 13;3(3):e002227. doi: 10.1136/bmjopen-2012-002227 (PMC3612753; doi:10.1136/bmjopen-2012-002227), 2013-03-13

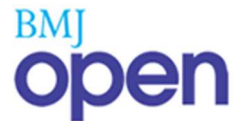

**Developing A Brief Screening Instrument for Psychosocial Risk Associated with Genetic Testing – A Pan Canadian Cohort Study**

|                                 |                                                                                                                                                                                                                                                                                                                                                                                                                                                                                                                                                                                                                                                                                                                                                                                                                                                                                                                                                                                                            |
|---------------------------------|------------------------------------------------------------------------------------------------------------------------------------------------------------------------------------------------------------------------------------------------------------------------------------------------------------------------------------------------------------------------------------------------------------------------------------------------------------------------------------------------------------------------------------------------------------------------------------------------------------------------------------------------------------------------------------------------------------------------------------------------------------------------------------------------------------------------------------------------------------------------------------------------------------------------------------------------------------------------------------------------------------|
| Journal:                        | <i>BMJ Open</i>                                                                                                                                                                                                                                                                                                                                                                                                                                                                                                                                                                                                                                                                                                                                                                                                                                                                                                                                                                                            |
| Manuscript ID:                  | bmjopen-2012-002227                                                                                                                                                                                                                                                                                                                                                                                                                                                                                                                                                                                                                                                                                                                                                                                                                                                                                                                                                                                        |
| Article Type:                   | Research                                                                                                                                                                                                                                                                                                                                                                                                                                                                                                                                                                                                                                                                                                                                                                                                                                                                                                                                                                                                   |
| Date Submitted by the Author:   | 15-Oct-2012                                                                                                                                                                                                                                                                                                                                                                                                                                                                                                                                                                                                                                                                                                                                                                                                                                                                                                                                                                                                |
| Complete List of Authors:       | Esplen, Mary Jane; Toronto General Hospital, Behavioural Science & Health Research Division; de Souza Institute, Cappelli, Mario; Children's Hospital of Eastern Ontario, ; University of Ottawa,<br>Wong, Jiahui; de Souza Institute, ; University of Toronto, Department of Psychiatry<br>Bottorff, Joan; University of British Columbia Okanagan,<br>Hunter, Jon; Mount Sinai Hospital, ; University of Toronto, Department of Psychiatry<br>Carroll, June; Mount Sinai Hospital,<br>Dorval, Michel; Laval University,<br>Wilson, Brenda; University of Ottawa,<br>Allanson, Judith; Childrens Hospital of Eastern Ontario, Genetics<br>Semotiuk, Kara; Mount Sinai Hospital, Zane Cohen Centre for Digestive Diseases<br>Aronson, Melyssa; Mount Sinai Hospital, Zane Cohen Centre for Digestive Diseases<br>Bordeleau, Louise; McMaster University,<br>Charlemagne, Nicole; Toronto General Hospital, Behavioural Science & Health Research Division<br>Meschino, Wendy; North York General Hospital, |
| <b>Primary Subject Heading</b>: | Genetics and genomics                                                                                                                                                                                                                                                                                                                                                                                                                                                                                                                                                                                                                                                                                                                                                                                                                                                                                                                                                                                      |
| Secondary Subject Heading:      | Health services research                                                                                                                                                                                                                                                                                                                                                                                                                                                                                                                                                                                                                                                                                                                                                                                                                                                                                                                                                                                   |
| Keywords:                       | Genetics < TROPICAL MEDICINE, Cancer, Psychosocial, Screening, Psychosocial adjustment, behavioural science                                                                                                                                                                                                                                                                                                                                                                                                                                                                                                                                                                                                                                                                                                                                                                                                                                                                                                |
|                                 |                                                                                                                                                                                                                                                                                                                                                                                                                                                                                                                                                                                                                                                                                                                                                                                                                                                                                                                                                                                                            |

SCHOLARONE™  
Manuscripts

**Title**

Developing A Brief Screening Instrument for Psychosocial Risk Associated with Genetic Testing – A Pan Canadian Cohort Study

**Corresponding Author Address**

Mary Jane Esplen, PhD  
CIHR Scientist and Professor  
Department of Psychiatry, Faculty of Medicine, University of Toronto  
Behavioral Sciences and Health Research Division  
University Health Network  
200 Elizabeth Street, 9-EN-242A  
Toronto ON M5G 2C4 Canada  
Tel: (416) 340-3024  
Fax: (416) 340-4739  
Email: mesplen@uhnres.utoronto.ca

**List of Authors and Institutions**

Mary Jane Esplen PhD<sup>1,2,3</sup>, Mario Cappelli PhD<sup>4</sup>, Jiahui Wong PhD<sup>2,3</sup>, Joan Bottorff PhD<sup>5</sup>, Jon Hunter MD<sup>2,6</sup>, June Carroll MD<sup>6</sup>, Michel Dorval PhD<sup>7</sup>, Brenda Wilson PhD<sup>8</sup>, Judith Allanson MD<sup>9</sup>, Kara Semotiuk MSc<sup>10</sup>, Melyssa Aronson MSc<sup>10</sup>, Louise Bordeleau MD<sup>11</sup>, Nicole Charlemagne MSW<sup>1</sup>, Wendy Meschino MD<sup>12</sup>

<sup>1</sup>Toronto General Research Institute, Toronto ON; <sup>2</sup>University of Toronto: Department of Psychiatry, Toronto ON; <sup>3</sup>de Souza Institute, Toronto ON; <sup>4</sup>Children's Hospital of Eastern Ontario, Ottawa ON; <sup>5</sup>University of British Columbia Okanagan, Kelowna BC; <sup>6</sup>Mount Sinai Hospital, Toronto ON; <sup>7</sup>Laval University, Quebec QC; <sup>8</sup>University of Ottawa, Ottawa ON; <sup>9</sup>Eastern Ontario Regional Genetics Centre, Ottawa ON; <sup>10</sup>Zane Cohen Centre for Digestive Diseases, Mount Sinai Hospital, Toronto ON; <sup>11</sup>McMaster University, Hamilton ON; <sup>12</sup>North York General Hospital, Toronto ON.

**Keywords:**

Genetics, Psychosocial, Screening, Psychosocial Problems, Psychosocial Functioning, Psychological Risk Factors

**Word Count:** 4616

## Summary

### 1) Article Focus

- A significant group of individuals undergoing genetic testing for Adult onset disease experience distress or challenges in adaptation
- Current psychological screening tools do not take into consideration “risk factors” associated with heritable illness or genetic-related stressors
- A screening tool designed for genetic testing services is a useful tool to guide clinicians in relation to which patients would benefit from added psychosocial support during the genetic testing process.

### 2) Key Messages

- A subgroup of patients undergoing genetic testing required added psychosocial support to facilitate adaptation to genetic/ risk information. Busy genetic service providers can face challenges to identify these individuals and provide timely interventions or referrals.
- A new brief instrument was designed and validated to identify those individuals at psychological risk who are undergoing genetic testing for adult onset diseases.
- This is the first study to develop and validate a psychological screening instrument for genetic testing field.

### 3) Strengths and Limitations

- This newly developed tool, Genetic Psychosocial Risk Instrument (GPRI), is the first reported psychosocial screening instrument for use across Adult Onset Hereditary Diseases.
- The GPRI demonstrates promising psychometric properties as a tool designed to assist genetics health care providers determine which of their patients undergoing genetic testing for AOHD is at increased psychological risk and who will benefit from added psychosocial support.
- Study findings are limited by the characteristics of the sample, most participants were female and undergoing testing for BRCA1/2. Future studies could further address the validity of GPRI in male populations and in the rare adult onset hereditary diseases, such as Huntington’s Disease.

**Abstract:**

Objectives: To develop a brief, reliable and valid screening instrument for use in the genetic testing context.

Design: A prospective two phase cohort study.

Setting: 5 genetic testing centres in primary care setting across Canada for Adult Onset Hereditary Disease (AOHD) such as cancer, Huntingtons, or Hemochromatosis.

Participants: 141 individuals were approached and consented to the instrument development phase of the study (Phase I). The Genetic Psychosocial Risk Instrument (GPRI) developed in Phase I was tested in Phase II for item refinement and validation. A separate cohort of 722 individuals consented to the study, 712 completed the baseline package, and 463 completed all follow up assessments. Most participants were female, at mid-life stage. Individuals in advanced stages of the illness or with cognitive impairment or language barrier were excluded.

Interventions: Phase I: GPRI items were generated from a review of the literature, and refined with input from health care providers and the first cohort of participants. Phase II: further item refinement and validation was conducted with a second cohort of participants who completed the GPRI at baseline and were followed for psychological distress one month post genetic testing results.

Primary and secondary outcome measures: GPRI, Hamilton Depression Rating Scale (HAM-D), Hamilton Anxiety Rating Scale (HAM-A), Brief Symptom Inventory (BSI), and Impact of Event Scale (IES).

Results: The final 20 item GPRI had a high reliability with a Cronbach's Alpha at 0.81. The construct validity was supported by high correlations between GPRI and BSI and IES. The predictive value was demonstrated by a Receiver Operating Characteristic (ROC) curve of 0.78 plotting GPRI against follow up assessments using HAM-D and HAM-A.

Conclusions: With a cut off score of 50, GPRI identified 84% of participants who displayed distress post genetic testing results, supporting its potential usefulness in a clinical setting.

Word count: 297

Trial registration: Not applicable

## INTRODUCTION

Genetic predisposition is an important determinant of chronic disease and disability. Despite the benefits of genetic testing, such as increased screening or prophylactic interventions, individuals at high risk for serious illness may become increasingly fearful, worried or distressed about the future. In fact, a consistent finding is that the majority of individuals do adjust to genetic test results, however a subset of individuals undergoing genetic testing for Adult Onset Hereditary Disease (AOHD) experience psychological distress. A screening tool, designed for the genetics testing context, would be ideal to assist health care providers to identify this particular group in a timely manner in order to provide appropriate preventive care or follow up interventions. Herein, we present a newly developed psychological risk screening instrument that can be readily used within a genetic service for AOHD.

### **Risk Factors and Psychological Impact of Genetic Testing: The Evidence**

The knowledge of genetic risk is life-long and individuals and families often find themselves confronted with ongoing need to face issues and make decisions. Examples include decisions about prevention and treatment options (e.g. increased surveillance, prophylactic surgery, chemoprevention), test result notification to family members, and relationship decisions (i.e. marriage, childbearing) [1, 2]. Studies utilizing standardized measures of distress have demonstrated that 8 to 25% of individuals undergoing genetic testing experience distress, the level of which falls within the clinical ranges for depression and anxiety [2-5]. Studies that have utilized standardized disease specific measures of distress (i.e. cancer worry scales) have demonstrated significantly somewhat higher prevalence levels [6, 7].

1  
2  
3 The risk factors for psychological distress amongst individuals undergoing genetic testing  
4 have been delineated in several studies [4, 8, 9]. While there is generally elevated distress  
5 among those who receive positive test results [9-11], individuals testing negative or receiving  
6 uninformative results may also have adjustment difficulties [12]. For example, individuals may  
7 feel guilt or continue to worry about their disease risk [2, 7, 12]. These findings highlight the  
8 importance of considering risk factors in addition to the test result itself. Individuals who have  
9 elevated distress at the pre test stage and those with a previous psychiatric history (i.e.,  
10 depression) are particularly at risk for an adverse psychological outcome after testing [2, 8, 9].  
11  
12

13  
14  
15 Additional risk factors for distress are more specific to the genetics context and include  
16 the level of penetrance of the gene mutation or degree of certainty of developing the disease [4].  
17 The perception of control over the disease (including the number of prevention/treatment  
18 options) and perception of the immediacy of risk (proximity in age to perceived disease onset)  
19 are important predictors [4, 13]. The expectation of a negative test result can play a role in  
20 adjustment, as can the context of test results of other family members [9, 14]. As in other  
21 medical areas, specific coping styles can affect adjustment [15]. The prior experiences with loss  
22 of family members to disease, as well as the developmental level (i.e. young age) of the  
23 individual at the time of the loss [2, 3, 16] are significant factors affecting potential adjustment.  
24 In addition, the prior experience of giving care to a family member with the disease and lower  
25 levels of social support have been associated with poorer adjustment following a positive test  
26 result [2-4, 8, 16].  
27  
28  
29  
30  
31  
32  
33  
34  
35  
36  
37  
38  
39  
40  
41  
42  
43  
44  
45  
46  
47  
48  
49

50 It is clear that there is not one predominant factor, but rather, a series of variables that  
51 may contribute to elevated levels of psychological distress [2, 17]. Emotional reactions may  
52 impede the assimilation of risk information and the adoption of preventive measures [2, 18].  
53  
54  
55  
56  
57  
58  
59  
60

1  
2  
3 Psychological distress occurs along a continuum [19, 20] and can be difficult to identify by  
4 health professionals [21]. Distress may not become manifest to the health care team until the  
5 patient reaches an observable crisis level, i.e. the onset of severe depression or anxiety, or  
6 significant conflicts with the family. An early screening instrument would enable healthcare  
7 providers to identify patients being at higher psychological risk in order that appropriate support  
8 can be given at the right time. In fact, there is now a general consensus that genetic testing  
9 should be accompanied by psychological support to promote optimal adjustment [2, 22].  
10  
11  
12  
13  
14  
15  
16  
17  
18  
19  
20  
21

### 22 **Screening for Psychological Risk Factors- Why is it necessary?**

23  
24 The gold standard for identifying psychologically distressed individuals involves structured  
25 clinical interviews administered by a clinical psychologist or psychiatrist [21]. However, it is too  
26 costly and often not feasible in genetic clinics. Standardized measures of psychological  
27 functioning can also be used as a method for identifying distress. However, few clinics use these  
28 measures in practice because of personnel and time requirements for scoring and interpretation  
29 of them. Furthermore, these instruments tend to identify global symptoms that are consistent  
30 with the diagnostic classifications of anxiety and/or depression and may lack sensitivity to the  
31 important and unique issues that surround genetic testing; issues that may include concerns about  
32 family members, past experiences with an inheritable disease, and uncertainty about risk  
33 reduction options [19, 21]. In addition, items on these measures typically focus on symptoms of  
34 anxiety or depression, rather on variables associated with heritable disease or genetic testing or  
35 risk, which may pose barriers for use by genetics health service providers who may prefer  
36 instruments that at face value, appear to them and their patients as being more relevant to the  
37 genetic testing context.  
38  
39  
40  
41  
42  
43  
44  
45  
46  
47  
48  
49  
50  
51  
52  
53  
54  
55  
56  
57  
58  
59  
60

1  
2  
3 More recently, new outcome measures designed to assess the psychological impact of  
4 receiving genetic information have been developed. For example, the MICRA- is designed to  
5 assess concerns and impacts associated with genetic testing for BRCA1/2 [19] and the  
6 Psychological Adaptation to Genetic Information Scale is now available [23]. While these  
7 measures will require further validation, they provide more clinically relevant approaches to  
8 capturing specific impacts of genetic information, such as the sense of increased vulnerability  
9 and continued uncertainty often experienced following genetic testing [19, 23].  
10  
11  
12  
13  
14  
15  
16  
17  
18  
19

20 Measures of global psychological functioning and the evolving outcome measurement  
21 tools for the genetics field are not designed to “predict” vulnerability for future distress, but  
22 rather, measure current distress levels. Screening, in contrast, is a rapid, cost-effective  
23 alternative [21] to prospectively identify individuals who may experience significant difficulty in  
24 their attempts to adapt to their genetic information and any associated treatment options [17]. A  
25 screening tool enables providers to offer timely and focused educational and psychosocial  
26 interventions to prevent future distress.  
27  
28  
29  
30  
31  
32  
33  
34  
35

36 The primary *objective* of this study was to develop a brief, reliable and valid screening  
37 instrument for use in the genetic testing context. The new instrument aimed to incorporate  
38 empirically based risk factors for psychological distress and would need to show a high  
39 sensitivity, specificity and predictive validity indicating risk for future distress post genetic  
40 testing results. A cutoff point would be determined to guide clinical decisions as to whether or  
41 not to refer, further assess, or intervene to reduce an individual’s expressed concern.  
42  
43  
44  
45  
46  
47  
48  
49  
50

## 51 52 53 **METHODS AND MATERIALS** 54 55 56 57 58 59 60



1  
2  
3 The study was carried out from September 2005 to July 2010, with research ethics board  
4 approval from participating genetics clinics: Toronto (Mount Sinai Hospital, North York General  
5 Hospital, Princess Margaret Hospital); Ottawa (Children's Hospital of Eastern Ontario); and  
6 Vancouver (British Columbia Cancer Agency). Individuals beginning the genetic testing process  
7 for AOHD at each site were approached by genetic counsellors on the project team for their  
8 permission to be contacted about the study. Those who expressed interest were mailed the  
9 baseline package that included the informed consent. The informed consent included all  
10 components of the study, including questionnaires, follow-up phone calls, telephone interviews,  
11 as well as to the release of their genetic testing information to the research team.  
12  
13  
14  
15  
16  
17  
18  
19  
20  
21  
22  
23

24 A two phase approach was used for this study: **Phase I: Item Generation and Refinement**,  
25 and **Phase II: Validation**. The multi-stage method [24] takes validation into consideration at  
26 each stage of scale development and has been used successfully in previous studies [25].  
27  
28  
29  
30  
31  
32  
33

### 34 **Phase I: Item Generation and Refinement.**

#### 35 ***Item generation***

36 To generate items for the Genetic Psychosocial Risk Instrument (GPRI), a literature search was  
37 performed for the following AOHDs: Cancer (Hereditary Breast-Ovarian Cancer Syndrome/  
38 Lynch Syndrome), Huntington Disease (HD), and Hemochromatosis. These diseases were  
39 selected as they represented the majority of patients attending genetic clinics and had an  
40 associated available psychosocial literature for review. Databases including Cinahl (1982 to  
41 2006), Medline (1966 to 2006), PsychInfo (1985 to 2006), and Pubmed (1985 to 2006) were  
42 searched as well as hand search of references from major publications. Keywords included:  
43 genetic screening, genetic testing, psychological, psychological well-being, psychological  
44  
45  
46  
47  
48  
49  
50  
51  
52  
53  
54  
55  
56  
57  
58  
59  
60

1  
2  
3 adjustment, stress, adaptation, cancer worry, disease worry, psych functioning, and distress.  
4  
5 Selection criteria for the literature review included studies with a follow up design or review  
6  
7 articles. Each selected study was reviewed by two reviewers on its quality of evidence and  
8  
9 generalizability using a standardized template. A total of 73 relevant studies were identified  
10  
11 among the disease groups: 49 on cancer, 20 on HD, 2 on Hemochromatosis, and 2 described  
12  
13 mixed conditions.  
14  
15

16  
17 Risk factors for psychological distress identified by the literature review provided the  
18  
19 basis for item generation. Items were written in a mixed format where respondents were asked  
20  
21 for their endorsement of each statement ranging from Yes/No for risk factors of binary nature, to  
22  
23 a 5 point likert-type scale for risk factors with stages in frequency and/or intensity. The  
24  
25 instrument items were further refined by genetic service providers rating items on  
26  
27 *comprehension, readability, and perceived clinical relevance* using a ten-point scale with 0 being  
28  
29 "excellent/definitely relevant" and 10 being "very poor/definitely not relevant". Risk factor items  
30  
31 were removed if it was rated below five. Providers were also asked to suggest additional risk  
32  
33 factor items. These suggestions were checked against the literature for empirical evidence.  
34  
35 Following this step, 7 volunteers undergoing genetic testing for AOHDs were recruited to try out  
36  
37 the scale for clarity, succinctness and relevance from the clients' perspectives. At this stage, the  
38  
39 proposed instrument consisted of 56 items: demographics (4 items); perceived risk (8 items); life  
40  
41 events and family history of the disease (8 items); perceived impact of carrying a mutation (9  
42  
43 items); family communication (6 items); disease specific concerns (5 items); optimism (3 items);  
44  
45 social support (3 items), pre-morbid functioning and previous psychiatric history (10 items).  
46  
47  
48  
49  
50  
51  
52  
53  
54

55 ***Item refinement:***  
56  
57  
58  
59  
60

1  
2  
3  
4  
5  
6  
7  
8  
9  
10  
11  
12  
13  
14  
Subjects: Following informed consent, a convenient sample of 141 participants who had given blood for genetic tests at the Toronto and Ottawa sites completed the GPRI (using a three patients per item ratio) to select the best items for the candidate scale. The participants were middle aged (48.67 + 13.29), mostly female (77%) testing for hereditary breast cancer, and many (65%) had already suffered the onset of the illness.

15  
16  
17  
18  
19  
20  
21  
22  
23  
24  
25  
26  
27  
28  
29  
30  
31  
32  
33  
Scoring: To ensure that binary items carry an equal weight as the 5 point likert-type items, a score of 5 was assigned to *Yes* and 1 to *No*. A score of 3 or mean-substitute was assigned to *Not Applicable* to allow it to be counted in the total score. Reliability analysis was carried out and a Cronbach's Alpha was set for .75 or higher for the scale to move to the next phase [26]. Any item with an item-total correlation less than .20 was identified for potential removal. Using team consensus, a total of 19 items were removed, combined or substituted, resulting in a 37 item GPRI candidate scale at the end of phase I.

### 34 35 36 37 38 39 40 41 42 43 44 45 46 47 48 49 50 51 52 53 54 55 56 57 58 59 60 **Phase II: Scale Validation**

Subjects: Individuals undergoing genetic testing for one of the AOHDs in each of the five study sites were invited to participate in the study. To be included individuals needed to be: 1) age 18 or above undergoing genetic testing for cancer, HD, or Hemochromatosis; 2) fluent in English; and 3) residing within 1.5 hours driving distance from study site. Although the onset of an AOHD was not an exclusion criterion, individuals in advanced stages of the illness and / or who were unable to consent due to cognitive impairment were excluded. Participants were asked to complete a set of questionnaires described below within a one month period following the provision of a blood sample and while awaiting test results. Within two weeks to one month post

1  
2  
3 genetic test results, participants were mailed the follow-up questionnaires and received a  
4  
5 telephone interview from the project team for the assessment of distress.  
6  
7

8 Materials: At baseline, three psychosocial measures were used: GPRI Candidate Scale  
9  
10 from Phase I. To facilitate scoring of the scale by genetic providers, scores for response to each  
11  
12 item on the GPRI are imbedded in the questionnaire, where clinicians can calculate a total score  
13  
14 in less than 5 minutes. Brief Symptom Inventory (BSI) The BSI is a 53-item measure of  
15  
16 psychological distress that contains three global scales i) depression, ii) anxiety and iii)  
17  
18 somatization [27]. It is widely used in medical and psychiatric populations to assess  
19  
20 psychological functioning; Impact of Event Scale (IES): The IES is a 15-item, likert-style scale  
21  
22 used to assess the experience of stress and is designed to be easily anchored to have individuals  
23  
24 report on items in relation to a specific stressor or life event (i.e. the stress of a positive genetic  
25  
26 test result). It has two sub-scales: i) intrusive thoughts and feelings associated with the stressful  
27  
28 life event, and ii) items associated with patterns of avoidance of certain thoughts, feelings, or  
29  
30 situations [28].  
31  
32  
33  
34  
35

36 Measures at one month post genetic testing results included: the BSI, IES and the  
37  
38 telephone based Hamilton Depression 29-item Rating Scale (HAM-D) and Hamilton Anxiety  
39  
40 Rating Scale (HAM-A). The HAM-D evaluates depressed mood, vegetative and cognitive  
41  
42 symptoms of depression, and comorbid anxiety symptoms [29]. The HAM-A quantifies the  
43  
44 severity of anxiety symptomatology and consists of 14 items. The HAM-D and HAM-A have  
45  
46 demonstrated validity in clinical interview, in person or by telephone [30]. The one-month  
47  
48 follow-up time point was selected as it is when elevated distress might occur [31]. In addition,  
49  
50 the 2-week duration criterion for depression defined by the Diagnostic and Statistical Manual of  
51  
52 Mental Disorders, Fourth Edition (DSM-IV) is met by this time frame.  
53  
54  
55  
56  
57  
58  
59  
60

### Assessing Psychometric Property of the Scale

As a first step, items were required to have at least an 80% response rate. Second, each item was examined to determine its contribution to the internal consistency of the total 37-item scale. The minimum item-total correlation was set at .20 [32].

A principal components factor analysis with varimax rotation was performed on the candidate scale to examine the factor structure and the loading of the items. To assess the *convergent validity* of the candidate scale, the correlations between baseline GPRI, IES and BSI were calculated. To assess the *sensitivity, specificity and predictive value* of the GPRI, the follow up HAM-D and HAM-A were used to identify “cases”. For example, participants with a high GPRI at baseline would be classified as “at risk” for future onset of adjustment difficulties. This would be confirmed by a high HAM-D or HAM-A score or “cases” during 1 month follow up; those with low GPRI should receive low score in HAM-D or HAM-A as “non-cases”. The predictive value of the GRPI, describing the number of test-positives (in our case, high GPRI) who truly have the psychological condition (i.e. cases identified by HAM-D or HAM-A), was tested by a Receiver Operating Characteristic (ROC) curve which visually plotted the true positive rate (sensitivity) over false positive rate (1-specificity).

To address the issue of missing follow up data in a cohort study, as suggested in the literature [33], we tested the assumption that the sub sample with missing data had a similar baseline exposure (similar GPRI) as the non-missing subsample by comparing baseline GPRI between the two groups. This step assesses if there was systematic bias resulting from the loss of information in the follow up period.

## RESULTS

### Participant characteristics

Study packages were mailed to 1129 individuals interested in hearing more about the study. Of these individuals, 722 of them consented and 712 (98%) completed the GPRI. Most participants were tested for the inheritable cancers, while a small percentage of participants were tested for hemochromatosis and HD. Similar to phase I, phase II participants were mostly female, at mid-life stage, and more than half had a past diagnosis of the disease (see table 1).

Insert Table 1 about Here

Of the 712 participants, 620 (86%) individuals were contacted during the one month post genetic testing results follow-up phase. Among them, 481 (67%) completed IES and BSI self report and 463 (65%) who were successfully contacted completed a standardized telephone interview using HAM-D and HAM-A (up to 4 telephone calls were made).

Baseline GPRI score of the 249 individuals with missing follow up data was compared with the 463 individuals with complete data ( $49.5 \pm 13.09$  versus  $49.1 \pm 13.53$  respectively,  $p=0.74$ ). Because of the similarity between the two subsamples, we proceeded with reliability and validity analysis of the tool using the subsample that provided outcome data.

We carried out the calculation of depression and anxiety rate using follow up IES and BSI data. About 13.0% to 20.1% of participants reached the threshold of moderate to severe distress respectively (see table 2).

Insert Table 2 about Here

1  
2  
3  
4  
5  
6 HAM-D and HAM-A interview data from 463 participants were used as a validation tool to  
7  
8 measure distress post genetic testing results. The literature suggests that the observer-rating  
9  
10 scales should be used over subjective report scales as the principal outcome criterion in  
11  
12 psychological distress both in general practice and in research trials [34]. Defined by HAM-D  
13  
14  $\geq 12$  [35] or HAM-A  $\geq 10$  [36], the rates for distress was 13.7%. The rate was 13% for HD,  
15  
16 15% for breast cancer and 7% for Lynch Syndrome.  
17  
18  
19  
20  
21

### 22 **Reliability and Factor Analysis**

23  
24 A reliability analysis was performed on 37 items. Twenty items were selected based on the  
25  
26 criteria for item selection described in the methods section. The Cronbach's alpha of the 20 item  
27  
28 GPRI was 0.81 suggesting a good level of internal consistency.  
29  
30  
31

32 The factor analysis resulted in a psychometrically sound 3-factor solution, with subscales  
33  
34 representing the dimensions of: 1) Perceived impact and personal adjustment to genetic testing  
35  
36 (10 items); 2) Past history of mental health concerns (5 items) and 3) Personal history/family  
37  
38 history/loss to cancer (3 items). All three factors met the minimum Eigenvalue criteria of 1.  
39  
40

41 The first, 12-item factor (ALPHA = 0.85), accounting for 22% of the variance, includes  
42  
43 items associated with the anticipated or experienced impact of being at high risk for AOHD.  
44  
45 Example items included: "My worries about the disease affect my daily mood"; "The disease for  
46  
47 which I am at risk is currently causing a significant disruption in my family life".  
48  
49

50 The second 5-item factor (ALPHA = 0.76), accounted for an additional 14% of the total  
51  
52 variance, and reflected a sense of a person's past history or vulnerability of mental health issues,  
53  
54  
55  
56  
57  
58  
59  
60

1  
2  
3 e.g. “I have had emotional problems in the past”, These items have been used in other medical  
4 health areas [37, 38] and tend to be predictive of maladjustment [20] following a life event.  
5  
6

7  
8 The third 3 item factor (ALPHA = 0.08), accounted for 8% of the total variance and  
9 included a personal or family history of the genetic disease being tested in the clinic. Examples  
10 include: “I have a personal diagnosis of the disease for which I am receiving counseling”; “I lost  
11 a close family member to the disease for which I am receiving counseling”; and “I have taken  
12 care of a very ill parents or another close family member”. These three final items had low item  
13 total correlation because they were different from the rest of the items in that they focused on  
14 description of personal history, rather than psychosocial-related items. These items were kept in  
15 the scale as they contributed significantly to the overall variance, and correlated highly with  
16 HAM-D and HAM-A. To determine the relationships between the three factors/subscales,  
17 correlations were computed. Factor1 and factor2 had moderate correlations with each other  
18 (factor1/factor2  $r=0.30$ ,  $p<0.01$ ). The correlation of the first two factors with factor3 was much  
19 lower as expected (factor1/factor3  $r=0.06$ , and factor2/factor3  $r=0.01$ , not statistically  
20 significant). These results support the multidimensional character of the GPRI scale (see Table  
21 3).  
22  
23  
24  
25  
26  
27  
28  
29  
30  
31  
32  
33  
34  
35  
36  
37  
38  
39  
40  
41  
42  
43  
44  
45  
46  
47

48  
49  
50  
51  
52  
53  
54  
55  
56  
57  
58  
59  
60  
Insert Table 3 about Here

58 The total score for the 20 item GPRI ranged from 20 to 100, with a sample mean  $49.36 \pm 13.23$ .  
59 The total was calculated by the sum of the raw scores for each of the statements. Females had a  
60 significantly higher score for the GPRI than males ( $50.37 \pm 13.14$  vs  $41.91 \pm 11.47$ ,  $p<0.01$ ), and



1  
2  
3 participants testing for HD had a higher but non-significant score than participants testing for  
4  
5 cancer ( $52.24 \pm 13.24$  vs  $49.37 \pm 13.22$ , n.s.).  
6  
7  
8  
9

## 10 **Validity**

11  
12 Construct validity – correlations: The GPRI was assessed for its correlation with other  
13  
14 standardized measures of psychological functioning at baseline. Convergent validity was  
15  
16 demonstrated by the correlation between the GPRI and the following measures: a positive  
17  
18 correlation with the IES total score at  $r = .51$ ,  $p < .001$ , and with BSI at  $r = .58$ ,  $p < .001$ .  
19  
20  
21  
22  
23

24  
25 Sensitivity, specificity and the predictive value of GPRI for future distress: The HAM-D and  
26  
27 HAM-A were used to identify distress during the one month post genetic testing follow up. A  
28  
29 total of 63 “cases” (13.6% of 463 completers) were identified as having psychological distress  
30  
31 levels above threshold. Of these 63 cases, 55 reported genetic testing results: 18 positive, 26  
32  
33 negative and 11 uninformative. This is equivalent to 23% among participants testing positive,  
34  
35 10% among those with negative results, and 20% among uninformative. Participants scoring  
36  
37 above HAM-D (N=55) threshold had significantly higher GPRI scores than participants below  
38  
39 the threshold (N=408) ( $61.12 \pm 13.27$  vs.  $47.91 \pm 12.27$ ,  $p < 0.01$ ). Same patterns were observed for  
40  
41 HAM-A high (N=40) vs. low (N=423) ( $62.53 \pm 12.92$  vs.  $48.25 \pm 12.43$ ,  $p < 0.01$ ).  
42  
43  
44  
45

46  
47 The predictive value of a test describes how many of the test-positives (in this case, a  
48  
49 high score on GPRI) truly have the psychological condition. An ROC curve was used to plot the  
50  
51 true positive rate (sensitivity) over the false positive rate (1-specificity). A good ROC curve rises  
52  
53 sharply, indicating a high proportion in true positive and a low proportion of false positives. The  
54  
55  
56  
57  
58  
59  
60

1  
2  
3 ROC curve for the GPRI was 0.78, which is considered as an indicator of an adequate screening  
4 instrument [39].  
5  
6

7  
8 An important purpose of the GRPI in our study was to identify individuals at risk for post  
9 genetic testing psychological distress. Therefore, the cutoff value was set to maximize  
10 sensitivity – in another word, not to miss detecting a “case”. Using a GPRI cut off score of 50,  
11 the instrument was able to predict 84% of the “cases” identified by HAM-D or HAM-A  
12 conducted post genetic testing results, with a specificity value of 60% (Figure 1).  
13  
14  
15  
16  
17  
18  
19  
20  
21

22 Insert Figure 1 about Here  
23  
24  
25  
26

## 27 **DISCUSSION**

28  
29 The aim of this study was to develop a brief, easy-to-use psychosocial screening instrument  
30 specific for the genetic testing context and to examine its reliability and validity (Appendix A).  
31  
32 To our knowledge this is the first report of a psychosocial screening instrument for use across  
33 AOHD. Unlike current psychological instruments used mainly in research studies in genetics  
34 clinics to identify existing symptoms of depression and anxiety, or impacts, the GPRI assesses  
35 psychological risk factors, such as anticipated impacts of a genetic testing result and the  
36 perception of the disease. The GPRI demonstrates promising psychometric properties as a tool  
37 designed to assist genetics health care providers determine which of their patients undergoing  
38 genetic testing for AOHD is at increased psychological risk and who will benefit from added  
39 psychosocial support.  
40  
41  
42  
43  
44  
45  
46  
47  
48  
49  
50  
51  
52

53 A high reliability was demonstrated by a Cronbach's Alpha at 0.81, moderate to high  
54 item-total correlation and inter-item correlation of the whole scale. The construct validity of the  
55  
56  
57  
58  
59  
60

1  
2  
3 scale was supported by high correlations between the GPRI and standardized psychological  
4 measures (BSI, IES). The clinical utility and predictive value of the GPRI was supported as  
5 well. A GPRI score above the cutoff of 50 at baseline was able to predict 84% of “distress” cases  
6 identified by HAM-D or HAM-A, a strong indicator of its potential usefulness in a clinical  
7 setting.  
8  
9

10  
11 A brief self-administered screening questionnaire will be easy to incorporate into genetics  
12 clinics; the GPRI can be completed and scored quickly during clinical visits and without  
13 additional burden to patients and health providers. In addition, by focusing specifically on known  
14 risk factors associated with inheritable illness, the instrument will be perceived as being more  
15 clinically relevant and acceptable to patients. Patients with higher scores on the GPRI can be  
16 flagged and either receive telephone follow up to further assess concerns or potential distress, or  
17 be invited back for an appointment for further assessment treatment.  
18  
19  
20  
21  
22  
23  
24  
25  
26  
27  
28  
29  
30

31  
32 Alternatively, genetic counselors or geneticists with available psychosocial personnel  
33 could make a referral for a more formal psychosocial assessment to further explore and address  
34 the specific psychological factors self-reported. For example, in the case where an individual is  
35 particularly fearful of developing an illness or is concerned about specific impacts, such as  
36 expecting relationship or family communications difficulties, or for those with a past history of  
37 psychological illness, a psychologically trained health professional could employ cognitive-  
38 behavioral strategies to address ongoing anxiety, or provide psychological treatment to address  
39 any psychiatric symptoms (i.e. depression) [40]. Furthermore, several items incorporate  
40 variables related to heritable disease experiences or their perceptions, and the scale appeared  
41 acceptable to patients, demonstrating face validity in such a way that it may be more user  
42 friendly for the non-mental health professional, compared for example, to a standardized  
43  
44  
45  
46  
47  
48  
49  
50  
51  
52  
53  
54  
55  
56  
57  
58  
59  
60

1  
2  
3 psychological instrument on depression. The GPRI could be considered a “communimetric  
4 measures”, that is, the items themselves are useful for the clinician in communicating concerns  
5 about specific areas of functioning directly with the patient. For example, if item 6 is endorsed  
6 by the patient as “strongly agree”, the clinician can further explore the patient’s concern and help  
7 identify the need for further clinical services [41].  
8  
9

10  
11  
12  
13  
14  
15 Left untreated, significant levels of distress may lead to lower quality of life [40], or  
16 potentially lower satisfaction with genetics services [21]. A screening approach allows both for  
17 careful monitoring during a known stressful period-that of awaiting test results [42], and an  
18 opportunity for planned follow up and optimal use of limited psychosocial resources [2, 20, 21].  
19  
20  
21  
22  
23

24  
25 Our study findings are limited by the characteristics of the sample, in that most  
26 participants were female and undergoing testing for *BRCA1/2*. This pattern is similar to that  
27 observed in the literature on genetic testing for AOHD, which is predominantly focused on  
28 Hereditary Breast-Ovarian Cancer Syndrome. We attempted to obtain a larger sample of  
29 individuals undergoing genetic testing for HD or Lynch Syndrome which would presumably  
30 provide a greater sample of males. However, these sample pools were much smaller. This study  
31 and the GPRI represents a start to developing a general tool, since our belief and the literature  
32 suggests that these mental health issues or adjustment risk factors are not disease specific. We  
33 suggest that future studies address the validity of GPRI in male populations and in the rare adult  
34 onset hereditary diseases, such as HD. Future studies should also include randomized controlled  
35 trials to assess the effectiveness of the GPRI in predicting distress, the impact of the instrument  
36 on referral patterns, patient and provider satisfaction, and provider knowledge and skill in  
37 identifying and managing psychosocial distress, and on cost-effectiveness. The GPRI will also  
38  
39  
40  
41  
42  
43  
44  
45  
46  
47  
48  
49  
50  
51  
52  
53  
54  
55  
56  
57  
58  
59  
60

1  
2  
3 need to be evaluated in primary care settings where genetics services might be offered more  
4 frequently to meet the demand.  
5  
6  
7  
8  
9

## 10 **CONCLUSIONS**

11  
12 This is the first study to develop a screening tool specifically to help identify individuals  
13 undergoing genetic testing for AOHD who are at increased psychological risk. The study  
14 resulted in an easy to use, 20-item scale consisting of 3 factors with promising psychometric  
15 properties. The GPRI has the potential to be used as a clinical screening tool and as a validated  
16 measure for future studies. Future work can examine its impact on clinical referral patterns  
17 within the field of genetics, and on its acceptability, reliability and validity with larger samples  
18 of individuals undergoing genetic testing for HD, Lynch Syndrome, and potentially for emerging  
19 new genetic tests, such as for cardiac or psychiatric disorders.  
20  
21  
22  
23  
24  
25  
26  
27  
28  
29  
30  
31  
32  
33  
34  
35  
36  
37  
38  
39  
40  
41  
42  
43  
44  
45  
46  
47  
48  
49  
50  
51  
52  
53  
54  
55  
56  
57  
58  
59  
60

## Acknowledgement

The first author is a recipient of a career scientist award from the Canadian Institutes of Health Research (CIHR) and the Ontario Women's Health Council. This study was funded by Canadian Institutes of Health Research (CIHR) Grant No. AHC 73144. We would like to express our gratitude to all the genetic testing patients who participated in our study. Thank you for your contribution towards this very important work and the development of the instrument. Thank you also to the genetic counselors and clinic staff from the participating genetic centers who assisted in recruitment: Children's Hospital of Eastern Ontario (Eastern Ontario Regional Genetics Centre); North York General Hospital (Clinical Genetics); Mount Sinai Hospital (Familial GI Cancer Registry & Familial Breast Cancer Clinic); Princess Margaret Hospital (Familial Breast & Ovarian Cancer Clinic); and BC Cancer Agency (Hereditary Cancer Program). We would also like to acknowledge and thank the research staff for their commitment and hard work to complete this national multi-site study. Finally, the team would like to pay special recognition to the late Dr. Anne Summers, who was co-investigator on the team. Her dedication to the need for empirically based tools and her strong vision to support recipients of new genetic technology were key influences in the conceptualization, funding and completion of this study.

**Ethics:** Research Ethics Board approval was obtained at all five participating sites: Toronto (Mount Sinai Hospital, North York General Hospital, Princess Margaret Hospital); Ottawa (Children's Hospital of Eastern Ontario); and Vancouver (British Columbia Cancer Agency).

**Data Sharing Statement:** There is no additional data available

**Conflict of Interest:** The authors do not have any conflict of interest to disclose.

**Funding:** This study was funded by Canadian Institutes of Health Research (CIHR) Grant No. AHC 73144.

## Contributorship Statements

### **Dr. Mary Jane Esplen**

Principal Applicant responsible for leading all aspects of the research, oversees budget, hiring staff, supervising data collection, analysis and interpretation, and writing of all manuscripts and reports.

### **Dr. Mario Cappelli**

Co-principal inv. responsible for assisting in item generation and refinement, the implementation of data collection, interpretation of findings and writing of manuscripts and reports.

### **Dr. Jiahui Wong**

Co-Applicant responsible assisting in instrument development, statistical procedures, sampling and interpretation of findings and writing of manuscripts and reports.

### **Dr. Joan Bottorff**

Co-Applicant responsible for refining of items, guiding the recruitment of providers and testing of the instrument in genetic services, development of guidelines and writing of manuscripts and reports.

### **Dr. Jon Hunter**

Co-Applicant responsible for assisting in item generation and refinement, guideline development, interpretation of findings and writing of manuscripts and reports.

### **Dr. June Carroll**

Co-Applicant responsible for assisting in item generation and refinement, implementation of the screening validation strategy and development of guidelines, interpretation of findings and writing of manuscripts and reports.

### **Dr. Michel Dorval**

Co-Applicant responsible for refining of items, guiding the recruitment of providers and testing of the instrument in genetic services, interpretation of findings and writing of manuscripts and reports.

### **Dr. Brenda Wilson**

Co-Applicant responsible for co-leading the implementation of the consensus guidelines components of the proposed study. Will assist in item generation for tool, interpretation of findings, writing of manuscripts and reports.

### **Dr. Judith Allanson**

Co-Applicant responsible for refining of items, guiding the recruitment of providers/patients and testing of the instrument in genetic services, development of guidelines and writing of manuscripts and reports.

### **Ms. Kara Semotiuk**

Co-Applicant responsible for refining of items, guiding the recruitment of providers and testing of the instrument in genetic services and development of guidelines, and writing of manuscripts and reports.

### **Ms. Melyssa Aronson**

Co-Applicant responsible for refining of items, guiding the recruitment of providers and testing of the instrument in genetic services, development of guidelines and writing of manuscripts and reports.

### **Dr. Louise Bordeleau**

Co-Applicant responsible for overseeing recruitment at MSH and UHN site in Toronto, testing of instrument and interpretation of findings, writing of manuscripts and reports.

1  
2  
3  
4  
5  
6  
7  
8  
9  
10  
11  
12  
13  
14  
15  
16  
17  
18  
19  
20  
21  
22  
23  
24  
25  
26  
27  
28  
29  
30  
31  
32  
33  
34  
35  
36  
37  
38  
39  
40  
41  
42  
43  
44  
45  
46  
47  
48  
49  
50  
51  
52  
53  
54  
55  
56  
57  
58  
59  
60

**Ms. Nicole Charlemagne**

Project coordinator, responsible for: patient recruitment and follow-up; assisting in item generation, refinement, and overall layout and design of tool; data collection, data entry, and data clean-up; revisions and submission of manuscript.

**Dr. Wendy Meschino**

Co-Applicant responsible for refining of items, guiding the recruitment of providers and testing of the instrument in genetic services, interpretation of findings and writing of manuscripts and reports.

For peer review only



## REFERENCES

1. Lerman C, Croyle RT. Emotional and behavioral responses to genetic testing for susceptibility to cancer. *Oncology (Williston Park)*. 1996;**10**:191-5, 9; discussion 200-2.
2. Bleiker EM, Hahn DE, Aaronson NK. Psychosocial issues in cancer genetics--current status and future directions. *Acta Oncol*. 2003;**42**:276-86.
3. Wellisch DK, Lindberg NM. A psychological profile of depressed and nondepressed women at high risk for breast cancer. *Psychosomatics*. 2001;**42**:330-6.
4. Broadstock M, Michie S, Marteau T. Psychological consequences of predictive genetic testing: a systematic review. *Eur J Hum Genet*. 2000;**8**:731-8.
5. Ho SM, Ho JW, Bonanno GA, et al. Hopefulness predicts resilience after hereditary colorectal cancer genetic testing: a prospective outcome trajectories study. *BMC Cancer*. 2010;**10**:279.
6. Trask PC, Paterson AG, Wang C, et al. Cancer-specific worry interference in women attending a breast and ovarian cancer risk evaluation program: impact on emotional distress and health functioning. *Psychooncology*. 2001;**10**:349-60.
7. Coyne JC, Kruus L, Racioppo M, et al. What do ratings of cancer-specific distress mean among women at high risk of breast and ovarian cancer? *Am J Med Genet A*. 2003;**116A**:222-8.
8. Marteau TM, Croyle RT. The new genetics. Psychological responses to genetic testing. *BMJ*. 1998;**316**:693-6.
9. Meiser B. Psychological impact of genetic testing for cancer susceptibility: an update of the literature. *Psychooncology*. 2005;**14**:1060-74.
10. Hamilton JG, Lobel M, Moyer A. Emotional distress following genetic testing for hereditary breast and ovarian cancer: a meta-analytic review. *Health Psychol*. 2009;**28**:510-8.
11. Shaw C, Abrams K, Marteau TM. Psychological impact of predicting individuals' risks of illness: a systematic review. *Soc Sci Med*. 1999;**49**:1571-98.

- 1  
2  
3  
4  
5  
6  
7  
8  
9  
10  
11  
12  
13  
14  
15  
16  
17  
18  
19  
20  
21  
22  
23  
24  
25  
26  
27  
28  
29  
30  
31  
32  
33  
34  
35  
36  
37  
38  
39  
40  
41  
42  
43  
44  
45  
46  
47  
48  
49  
50  
51  
52  
53  
54  
55  
56  
57  
58  
59  
60
12. Dorval M, Gauthier G, Maunsell E, et al. No evidence of false reassurance among women with an inconclusive BRCA1/2 genetic test result. *Cancer Epidemiol Biomarkers Prev.* 2005;**14**:2862-7.
  13. Cameron LD, Sherman KA, Marteau TM, et al. Impact of genetic risk information and type of disease on perceived risk, anticipated affect, and expected consequences of genetic tests. *Health Psychol.* 2009;**28**:307-16.
  14. Smith KR, West JA, Croyle RT, et al. Familial context of genetic testing for cancer susceptibility: moderating effect of siblings' test results on psychological distress one to two weeks after BRCA1 mutation testing. *Cancer Epidemiol Biomarkers Prev.* 1999;**8**:385-92.
  15. Dougall AL, Smith AW, Somers TJ, et al. Coping with genetic testing for breast cancer susceptibility. *Psychosom Med.* 2009;**71**:98-105.
  16. Esplen MJ, Urquhart C, Butler K, et al. The experience of loss and anticipation of distress in colorectal cancer patients undergoing genetic testing. *J Psychosom Res.* 2003;**55**:427-35.
  17. Zabora JR. Screening procedures for psychological distress. In: Holland JC, editor. *Psycho-Oncology*. New York: Oxford University Press; 1998. p. 653-62.
  18. Watson M, Lloyd S, Davidson J, et al. The impact of genetic counselling on risk perception and mental health in women with a family history of breast cancer. *Br J Cancer.* 1999;**79**:868-74.
  19. Cella D, Hughes C, Peterman A, et al. A brief assessment of concerns associated with genetic testing for cancer: the Multidimensional Impact of Cancer Risk Assessment (MICRA) questionnaire. *Health Psychol.* 2002;**21**:564-72.
  20. Zabora J, BrintzenhofeSzoc K, Curbow B, et al. The prevalence of psychological distress by cancer site. *Psychooncology.* 2001;**10**:19-28.
  21. Thewes B, Meiser B, Tucker K, et al. Screening for psychological distress and vulnerability factors in women at increased risk for breast cancer: A review of the literature. *Psychology, Health & Medicine.* 2003;**8**:289-303.
  22. Howell D, Keller-Olaman S, Oliver T, et al. A Pan-Canadian Practice Guideline: Screening, Assessment and Care of Psychosocial Distress (Depression, Anxiety) in Adults with

1  
2  
3  
4  
5  
6  
7  
8  
9  
10  
11  
12  
13  
14  
15  
16  
17  
18  
19  
20  
21  
22  
23  
24  
25  
26  
27  
28  
29  
30  
31  
32  
33  
34  
35  
36  
37  
38  
39  
40  
41  
42  
43  
44  
45  
46  
47  
48  
49  
50  
51  
52  
53  
54  
55  
56  
57  
58  
59  
60

Cancer. Toronto: Canadian Partnership Against Cancer (Cancer Journey Action Group) and the Canadian Association of Psychosocial Oncology 2010.

23. Read CY, Perry DJ, Duffy ME. Design and psychometric evaluation of the Psychological Adaptation to Genetic Information Scale. *J Nurs Scholarsh*. 2005;**37**:203-8.

24. Jackson D. A sequential system for personality scale development. In: Spielberger C, editor. *Current Topics in Clinical and Community Psychology*. New York: Academic Press; 1970. p. 61-96.

25. Stuckless N, Goranson R. The vengeance scale: Development of a measure of attitudes toward revenge. *Journal of Social Behavior and Personality*. 1992;**7**:25-42.

26. Briggs SR, Cheek JM. The role of factor analysis in the development and evaluation of personality scales. *Journal of Personality*. 1986;**54**:106-48.

27. Derogatis LR. The brief symptom inventory (BSI). Administration, Scoring and Procedures Manual. 3rd ed. New York: National Computer Systems; 1993.

28. Horowitz MJ, Wilner N, Alvarez W. Impact of Events Scale: A Measure of Subjective Stress. *Psychosomatic Medicine*. 1979;**41**:209-18.

29. Hamilton MA. A rating scale for depression. *Journal of Neurology, Neurosurgery and Psychiatry*. 1960;**23**:56-23.

30. Katzelnick DJ, Simon GE, Pearson SD, et al. Randomized trial of a depression management program in high utilizers of medical care. *Arch Fam Med*. 2000;**9**:345-51.

31. DudokdeWit AC, Tibben A, Duivenvoorden HJ, et al. Predicting adaptation to presymptomatic DNA testing for late onset disorders: who will experience distress? Rotterdam Leiden Genetics Workgroup. *J Med Genet*. 1998;**35**:745-54.

32. Walsh W, Betz N. *Tests and Assessments*. New Jersey: Prentice Hall Inc; 1985.

33. Melnick EL, Everitt BS. *Quantitative risk analysis and assessment*. Hebokea NJ: John Wiley & Sons; 2008.

- 1  
2  
3 34. Moller HJ. Rating depressed patients: observer- vs self-assessment. *Eur Psychiatry*.  
4 2000;**15**:160-72.  
5  
6  
7  
8 35. Aben I, Verhey F, Lousberg R, et al. Validity of the beck depression inventory, hospital  
9 anxiety and depression scale, SCL-90, and hamilton depression rating scale as screening  
10 instruments for depression in stroke patients. *Psychosomatics*. 2002;**43**:386-93.  
11  
12  
13 36. Pasquini M, Biondi M, Costantini A, et al. Detection and treatment of depressive and  
14 anxiety disorders among cancer patients: feasibility and preliminary findings from a liaison  
15 service in an oncology division. *Depress Anxiety*. 2006;**23**:441-8.  
16  
17  
18  
19 37. Beck CT. A checklist to identify women at risk for developing postpartum depression. *J*  
20 *Obstet Gynecol Neonatal Nurs*. 1998;**27**:39-46.  
21  
22  
23 38. Reid AJ, Biringer A, Carroll JD, et al. Using the ALPHA form in practice to assess  
24 antenatal psychosocial health. Antenatal Psychosocial Health Assessment. *CMAJ*. 1998;**159**:677-  
25 84.  
26  
27  
28  
29 39. Goutham R. What is an ROC curve? *The Journal of Family Practice*. 2003;**52**:695.  
30  
31  
32 40. Esplen MJ, Hunter J. Therapy in the Setting of Genetic Predisposition to Cancer' in  
33 'Handbook of Psychotherapy in Cancer Care. In: Watson M, Kissane D, editors. Handbook of  
34 Psychotherapy in Cancer Care. London: John Wiley & Sons Ltd; 2011. p. 201-12.  
35  
36  
37  
38 41. Lyons JS. A Communication Theory of Measurement in Human Service Settings. New  
39 York: Springer; 2009.  
40  
41  
42 42. Broadstock M, Michie S, Gray J, et al. The psychological consequences of offering  
43 mutation searching in the family for those at risk of hereditary breast and ovarian cancer--a pilot  
44 study. *Psychooncology*. 2000;**9**:537-48.  
45  
46  
47  
48  
49  
50  
51  
52  
53  
54  
55  
56  
57  
58  
59  
60

**Table 1**  
**Description of Phase II Participants Characteristics (N=712)**

| Variables in GPRI*                                                                                       |                           |                                                 |
|----------------------------------------------------------------------------------------------------------|---------------------------|-------------------------------------------------|
| Age in years: mean (SD)                                                                                  |                           | 49.80 (+12.53),<br>range 18-80,<br>median 50.00 |
| Gender: n (%)                                                                                            | Male                      | 85 (12%)                                        |
|                                                                                                          | Female                    | 627 (88%)                                       |
| Type of AOHD being tested: n (%)                                                                         | Cancer (BRCA)             | 580 (82%)                                       |
|                                                                                                          | Cancer (other, ie, Colon) | 90 (13%)                                        |
|                                                                                                          | Huntington disease        | 31 (4%)                                         |
|                                                                                                          | Hemochromatosis           | 5 (1%)                                          |
| Personal history of disease being tested: n (%)                                                          |                           | 441 (62%)                                       |
| Recent significant event (diagnosis of or loss of significant others to the disease being tested): n (%) |                           | 333 (47%)                                       |
| Disease worries affect daily mood (strongly agree or somewhat agree): n (%)                              |                           | 189 (27%)                                       |
| Sad in the past month (often or almost all the time): n (%)                                              |                           | 121 (17%)                                       |
| Anxious in the past month (often or almost all the time) n (%)                                           |                           | 121 (17%)                                       |

\* Note: there are missing data for some GRPT variables. The total count for each variable do not necessarily add up to 712

**Table 2**  
**Psychosocial Well Being 1 Month Post Genetic Testing Results**  
**By Disease Type (N=473)**

|                                                                                                                                                                                                                                                                                                                       | <b>Overall<br/>N (%)</b> | <b>Huntington</b> | <b>BRCA</b> | <b>Other<br/>Cancer</b> |
|-----------------------------------------------------------------------------------------------------------------------------------------------------------------------------------------------------------------------------------------------------------------------------------------------------------------------|--------------------------|-------------------|-------------|-------------------------|
| IES intrusion $\geq 17^a$                                                                                                                                                                                                                                                                                             | 60 (13.0%)               | 5 (23.8%)         | 51 (12.5%)  | 4 (9.5%)                |
| IES avoidance $\geq 17^a$                                                                                                                                                                                                                                                                                             | 65 (13.7%)               | 5 (23.8%)         | 57 (14.0%)  | 3 (7.1%)                |
| BSI-18 total $\geq 13^b$                                                                                                                                                                                                                                                                                              | 95 (20.1%)               | 6 (28.6%)         | 86 (21.1%)  | 3 (7.1%)                |
| <p>a. Shemesh E. et al (2004) Posttraumatic stress, non adherence, and adverse outcome in survivors of a myocardial infarction. <i>Psychosomatic Medicine</i>, 66: 521-526</p> <p>b. Zabora et al (2001): A new psychosocial screening instrument for use with cancer patients. <i>Psychosomatics</i>, 42:241–246</p> |                          |                   |             |                         |

**Table 3**  
**GPRI Factor Solutions and Factor Loadings**

|                                                                                                                                                                                           | Factor Loadings | Communalities | Item-Total | Item Mean |
|-------------------------------------------------------------------------------------------------------------------------------------------------------------------------------------------|-----------------|---------------|------------|-----------|
| • My worries about the disease affect my daily mood                                                                                                                                       | .759            | .652          | .582       | 2.22      |
| • I worry often about my risk of getting the disease                                                                                                                                      | .742            | .551          | .529       | 2.67      |
| • I am concerned about my risk of getting the disease                                                                                                                                     | .656            | .484          | .472       | 3.28      |
| • I have generally felt nervous and anxious in the past month                                                                                                                             | .652            | .538          | .600       | 2.54      |
| • I have generally felt sad in the past month                                                                                                                                             | .627            | .524          | .572       | 2.58      |
| • If I learn that I have a genetic mutation,<br>... I will have more problems in my life                                                                                                  | .617            | .406          | .399       | 2.79      |
| ...I will have difficulties with my family relationships                                                                                                                                  | .513            | .324          | .424       | 1.62      |
| ... I will change plans for my career                                                                                                                                                     | .451            | .228          | .262       | 2.08      |
| • The disease is currently causing a significant disruption in my family life                                                                                                             | .568            | .408          | .463       | 2.42      |
| • I am worried that my test result will impact on my relationship with my significant other                                                                                               | .546            | .308          | .383       | 2.54      |
| • I am worried about talking to my children about the heritable nature of the disease for which I am being tested                                                                         | .522            | .326          | .453       | 2.04      |
| • I feel guilty that I might pass on the disease risk to my children                                                                                                                      | .508            | .276          | .414       | 3.11      |
| Factor 1: Anticipated or experienced impact of having a disease risk or genetic mutation: 12 statements, Cronbach's alpha = .85, inter – item correlation = .32, variance explained = 22% |                 |               |            |           |
| • I have had emotional problems in the past                                                                                                                                               | .796            | .655          | .423       | 2.66      |
| • I have been diagnosed with a depressive or anxiety disorder in the past                                                                                                                 | .769            | .596          | .349       | 2.01      |
| • I have had counselling with a mental health professional in the past                                                                                                                    | .762            | .593          | .433       | 2.85      |
| • I have had emotional problems that led me to thoughts about suicide                                                                                                                     | .623            | .389          | .262       | 1.45      |
| • I am now seeing a counselor for one or more of these emotional concerns                                                                                                                 | .509            | .272          | .274       | 1.35      |
| Factor 2: Personal history or vulnerability to mental health issues or symptoms: 5 items, Cronbach's alpha = .76, inter – item correlation = .39, variance explained = 14%                |                 |               |            |           |
| • I have taken care of a very ill parent or another close family member                                                                                                                   | .687            | .493          | .116       | 2.36      |
| • I lost a close family member (e.g. parent/ sibling) to the disease for which I am receiving counseling/testing                                                                          | .667            | .445          | -.002      | 2.87      |
| • I have/had a personal diagnosis of the disease for which I am receiving counseling/testing                                                                                              | -.642           | .413          | -.073      | 3.47      |
| Factor 3: Personal or family history of the genetic disease being tested in the clinic: 3 items, Cronbach's alpha = .08, inter – item correlation = .03, variance explained = 8%          |                 |               |            |           |

1  
2  
3  
4  
5  
6  
7  
8  
9  
10  
11  
12  
13  
14  
15  
16  
17  
18  
19  
20  
21  
22  
23  
24  
25  
26  
27  
28  
29  
30  
31  
32  
33  
34  
35  
36  
37  
38  
39  
40  
41  
42  
43  
44  
45  
46  
47  
48  
49  
50  
51  
52  
53  
54  
55  
56  
57  
58  
59  
60

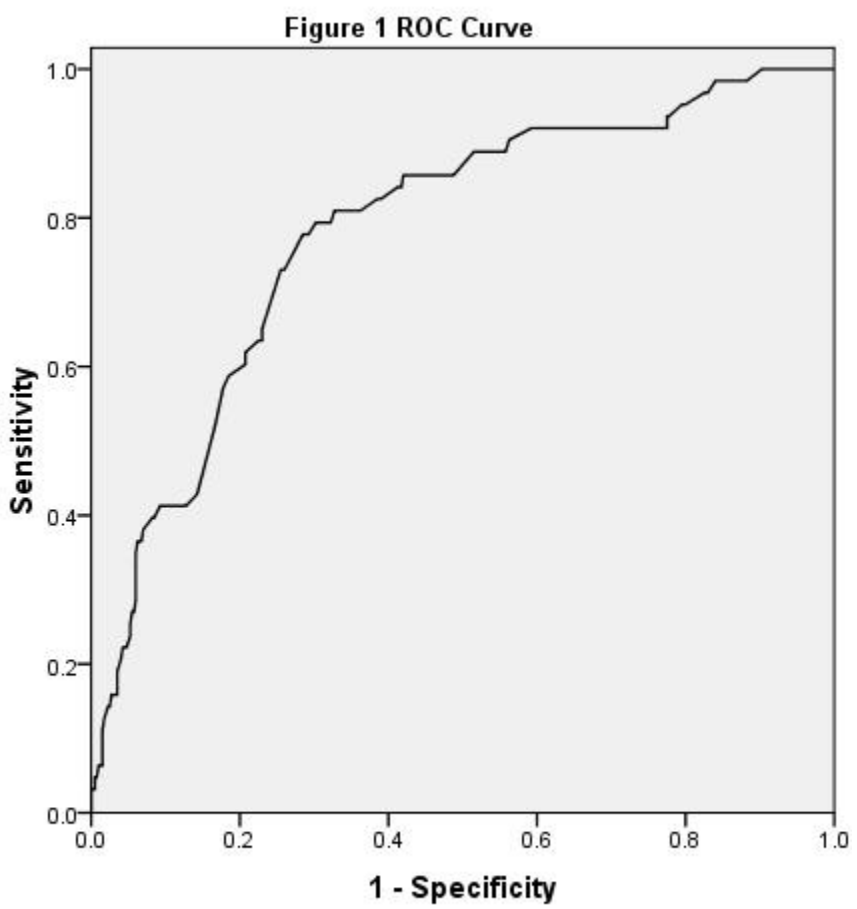

Diagonal segments are produced by ties.

For peer review only



# Genetic Psychosocial Risk Instrument (GPRI)

The purpose of this questionnaire is to help identify individuals who may need additional support while going through genetic testing. The questions are about your life experiences and feelings about the disease for which you are receiving genetic testing/counseling. Please note that whenever the word "disease" is used, it is referring to the disease for which you are having genetic testing and/or counseling. Please read each statement carefully, then respond by placing a firm checkmark in the most appropriate space.

|       |                        |
|-------|------------------------|
| Name: | Date (dd / mm / yyyy): |
|-------|------------------------|

1. I have/had a personal diagnosis of the disease for which I am receiving counseling/testing (5) Yes (1) No
2. I have taken care of a very ill parent or another close family member (e.g. sibling) (0) Yes (1) No  
 If yes, the illness was related to the condition for which I am receiving counseling/testing (5) Yes (3) No
3. I lost a close family member (e.g. parent/sibling) to the disease for which I am receiving counseling/testing (5) Yes (1) No  
 If yes, please indicate who the family member was who died (check all that apply):  
 (0) a parent (0) a sibling (0) other (specify) \_\_\_\_\_

|                                                                                                                                    | Strongly agree | Somewhat agree | Neither agree/disagree | Somewhat disagree | Strongly disagree | Not applicable |
|------------------------------------------------------------------------------------------------------------------------------------|----------------|----------------|------------------------|-------------------|-------------------|----------------|
| 4. If I learn that I <u>have</u> a genetic mutation, I believe that:                                                               |                |                |                        |                   |                   |                |
| a. I will have more problems in my life                                                                                            | 5              | 4              | 3                      | 2                 | 1                 | 0              |
| b. I will change plans for my career/ profession                                                                                   | 5              | 4              | 3                      | 2                 | 1                 | 3              |
| c. I will have difficulties in my family relationships                                                                             | 5              | 4              | 3                      | 2                 | 1                 | 3              |
| 5. The disease for which I am at risk is <u>currently</u> causing a significant disruption in my family life                       | 5              | 4              | 3                      | 2                 | 1                 | 3              |
| 6. I am worried that my test result will impact on my relationship with my significant other (or future partner)                   | 5              | 4              | 3                      | 2                 | 1                 | 3              |
| 7. I am worried about talking to my children (young or adult) about the heritable nature of the disease for which I'm being tested | 5              | 4              | 3                      | 2                 | 1                 | 3              |
| 8. My worries about the disease affect my daily mood                                                                               | 5              | 4              | 3                      | 2                 | 1                 | 3              |
| 9. I worry often about my risk of getting the disease                                                                              | 5              | 4              | 3                      | 2                 | 1                 | 3              |
| 10. I am concerned about my risk of getting the disease                                                                            | 5              | 4              | 3                      | 2                 | 1                 | 3              |
| 11. I feel guilty that I might pass on the disease risk to my children                                                             | 5              | 4              | 3                      | 2                 | 1                 | 3              |

|                                                                 | Almost all of the time | Often | Sometimes | Hardly ever | Not at all |
|-----------------------------------------------------------------|------------------------|-------|-----------|-------------|------------|
| 12. I have generally felt sad in the past month                 | 5                      | 4     | 3         | 2           | 1          |
| 13. I have generally felt nervous and anxious in the past month | 5                      | 4     | 3         | 2           | 1          |

14. I have had emotional problems in the past (5) Yes (1) No
15. I have had counseling with a counselor and/or a mental health professional in the past (5) Yes (1) No
16. I have been diagnosed with a depressive or anxiety disorder in the past (5) Yes (1) No
17. I have had emotional problems that led me to have thoughts about suicide (5) Yes (1) No
18. I am now seeing a counselor for one or more of these emotional concerns (5) Yes (1) No

19. I am interested in talking with a counsellor about one or more of these concerns (0) Yes (0) No

**FOR OFFICE USE ONLY**

Instruction to the user: Please sum the score of all items and enter the total score here \_\_\_\_\_

If the total score is 50 or greater, and if item 19 above is Yes, then a psychosocial referral is recommended.

For peer review only - <http://bmjopen.bmj.com/site/about/guidelines.xhtml>

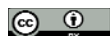



**Developing A Brief Screening Instrument for Psychosocial Risk Associated with Genetic Testing – A Pan Canadian Cohort Study**

|                                 |                                                                                                                                                                                                                                                                                                                                                                                                                                                                                                                                                                                                                                                                                                                                                                                                                                                                                                                                                                                                            |
|---------------------------------|------------------------------------------------------------------------------------------------------------------------------------------------------------------------------------------------------------------------------------------------------------------------------------------------------------------------------------------------------------------------------------------------------------------------------------------------------------------------------------------------------------------------------------------------------------------------------------------------------------------------------------------------------------------------------------------------------------------------------------------------------------------------------------------------------------------------------------------------------------------------------------------------------------------------------------------------------------------------------------------------------------|
| Journal:                        | <i>BMJ Open</i>                                                                                                                                                                                                                                                                                                                                                                                                                                                                                                                                                                                                                                                                                                                                                                                                                                                                                                                                                                                            |
| Manuscript ID:                  | bmjopen-2012-002227.R1                                                                                                                                                                                                                                                                                                                                                                                                                                                                                                                                                                                                                                                                                                                                                                                                                                                                                                                                                                                     |
| Article Type:                   | Research                                                                                                                                                                                                                                                                                                                                                                                                                                                                                                                                                                                                                                                                                                                                                                                                                                                                                                                                                                                                   |
| Date Submitted by the Author:   | 17-Jan-2013                                                                                                                                                                                                                                                                                                                                                                                                                                                                                                                                                                                                                                                                                                                                                                                                                                                                                                                                                                                                |
| Complete List of Authors:       | Esplen, Mary Jane; Toronto General Hospital, Behavioural Science & Health Research Division; de Souza Institute, Cappelli, Mario; Children's Hospital of Eastern Ontario, ; University of Ottawa,<br>Wong, Jiahui; de Souza Institute, ; University of Toronto, Department of Psychiatry<br>Bottorff, Joan; University of British Columbia Okanagan,<br>Hunter, Jon; Mount Sinai Hospital, ; University of Toronto, Department of Psychiatry<br>Carroll, June; Mount Sinai Hospital,<br>Dorval, Michel; Laval University,<br>Wilson, Brenda; University of Ottawa,<br>Allanson, Judith; Childrens Hospital of Eastern Ontario, Genetics<br>Semotiuk, Kara; Mount Sinai Hospital, Zane Cohen Centre for Digestive Diseases<br>Aronson, Melyssa; Mount Sinai Hospital, Zane Cohen Centre for Digestive Diseases<br>Bordeleau, Louise; McMaster University,<br>Charlemagne, Nicole; Toronto General Hospital, Behavioural Science & Health Research Division<br>Meschino, Wendy; North York General Hospital, |
| <b>Primary Subject Heading</b>: | Genetics and genomics                                                                                                                                                                                                                                                                                                                                                                                                                                                                                                                                                                                                                                                                                                                                                                                                                                                                                                                                                                                      |
| Secondary Subject Heading:      | Health services research                                                                                                                                                                                                                                                                                                                                                                                                                                                                                                                                                                                                                                                                                                                                                                                                                                                                                                                                                                                   |
| Keywords:                       | Genetics < TROPICAL MEDICINE, Cancer, Psychosocial, Screening, Psychosocial adjustment, behavioural science                                                                                                                                                                                                                                                                                                                                                                                                                                                                                                                                                                                                                                                                                                                                                                                                                                                                                                |
|                                 |                                                                                                                                                                                                                                                                                                                                                                                                                                                                                                                                                                                                                                                                                                                                                                                                                                                                                                                                                                                                            |

SCHOLARONE™  
Manuscripts

**Title**

Developing A Brief Screening Instrument for Psychosocial Risk Associated with Genetic Testing – A Pan Canadian Cohort Study

**Corresponding Author Address**

Mary Jane Esplen, PhD  
CIHR Scientist and Professor  
Department of Psychiatry, Faculty of Medicine, University of Toronto  
Behavioral Sciences and Health Research Division  
University Health Network  
200 Elizabeth Street, 9-EN-242A  
Toronto ON M5G 2C4 Canada  
Tel: (416) 340-3024  
Fax: (416) 340-4739  
Email: mesplen@uhnres.utoronto.ca

**List of Authors and Institutions**

Mary Jane Esplen PhD<sup>1,2,3</sup>, Mario Cappelli PhD<sup>4</sup>, Jiahui Wong PhD<sup>2,3</sup>, Joan Bottorff PhD<sup>5</sup>, Jon Hunter MD<sup>2,6</sup>, June Carroll MD<sup>6</sup>, Michel Dorval PhD<sup>7</sup>, Brenda Wilson PhD<sup>8</sup>, Judith Allanson MD<sup>9</sup>, Kara Semotiuk MSc<sup>10</sup>, Melyssa Aronson MSc<sup>10</sup>, Louise Bordeleau MD<sup>11</sup>, Nicole Charlemagne MSW<sup>1</sup>, Wendy Meschino MD<sup>12</sup>  
<sup>1</sup>University Health Network, Toronto ON; <sup>2</sup>University of Toronto: Department of Psychiatry, Toronto ON; <sup>3</sup>de Souza Institute, Toronto ON; <sup>4</sup>Children's Hospital of Eastern Ontario, Ottawa ON; <sup>5</sup>University of British Columbia Okanagan, Kelowna BC; <sup>6</sup>Mount Sinai Hospital, Toronto ON; <sup>7</sup>Laval University, Quebec QC; <sup>8</sup>University of Ottawa, Ottawa ON; <sup>9</sup>Eastern Ontario Regional Genetics Centre, Ottawa ON; <sup>10</sup>Zane Cohen Centre for Digestive Diseases, Mount Sinai Hospital, Toronto ON; <sup>11</sup>McMaster University, Hamilton ON; <sup>12</sup>North York General Hospital, Toronto ON.

**Keywords:**

Genetics, Psychosocial, Screening, Psychosocial Problems, Psychosocial Functioning, Psychological Risk Factors

**Word Count:** 5115

**Abstract:**

Objectives: To develop a brief, reliable and valid instrument to screen psychosocial risk among those who are undergoing genetic testing for Adult-Onset Hereditary Disease (AOHD).

Design: A prospective two-phase cohort study.

Setting: 5 genetic testing centres for AOHD such as cancer, Huntingtons, or Hemochromatosis, in ambulatory clinics of tertiary hospitals across Canada.

Participants: 141 individuals undergoing genetic testing were approached and consented to the instrument development phase of the study (Phase I). The Genetic Psychosocial Risk Instrument (GPRI) developed in Phase I was tested in Phase II for item refinement and validation. A separate cohort of 722 individuals consented to the study, 712 completed the baseline package, and 463 completed all follow-up assessments. Most participants were female, at mid-life stage. Individuals in advanced stages of the illness or with cognitive impairment or language barrier were excluded.

Interventions: Phase I: GPRI items were generated from 1) a review of the literature, 2) input from genetic counselors and 3) phase I participants. Phase II: further item refinement and validation was conducted with a second cohort of participants who completed the GPRI at baseline and were followed for psychological distress one month post genetic testing results.

Primary and secondary outcome measures: GPRI, Hamilton Depression Rating Scale (HAM-D), Hamilton Anxiety Rating Scale (HAM-A), Brief Symptom Inventory (BSI), and Impact of Event Scale (IES).

Results: The final 20 item GPRI had a high reliability - Cronbach's Alpha at 0.81. The construct validity was supported by high correlations between GPRI and BSI and IES. The predictive value was demonstrated by a Receiver Operating Characteristic (ROC) curve of 0.78 plotting GPRI against follow-up assessments using HAM-D and HAM-A.

Conclusions: With a cut off score of 50, GPRI identified 84% of participants who displayed distress post genetic testing results, supporting its potential usefulness in a clinical setting.

Word count: 299

Trial registration: Not applicable

## Summary

### 1) Article Focus

- A significant group of individuals undergoing genetic testing for Adult onset disease experience distress or challenges in adaptation, some might develop depression or anxiety
- Existing psychological screening tools do not take into consideration “risk factors” associated with heritable illness or genetic-related stressors
- A screening tool designed for genetic testing services is a useful tool to guide clinicians in relation to which patients would benefit from added psychosocial support during the genetic testing process.

### 2) Key Messages

- A subgroup of patients undergoing genetic testing required added psychosocial support to facilitate adaptation to genetic/ risk information. Busy genetic service providers can face challenges to identify these individuals and provide timely interventions or referrals.
- A new brief instrument was designed and validated to identify those individuals at risk for psychological distress such as depression or anxiety who are undergoing genetic testing for adult onset diseases.
- This is the first study to develop and validate a psychological screening instrument for genetic testing field.

### 3) Strengths and Limitations

- This newly developed tool, Genetic Psychosocial Risk Instrument (GPRI), is the first reported psychosocial screening instrument for use across Adult Onset Hereditary Diseases.
- The GPRI demonstrates promising psychometric properties as a tool designed to assist genetics health care providers determine which of their patients undergoing genetic testing for AOHD is at increased psychological risk and who will benefit from added psychosocial support.
- Study findings are limited by the characteristics of the sample, most participants were female and undergoing testing for BRCA1/2. Future studies could further address the validity of GPRI in male populations and in the rare adult onset hereditary diseases, such as Huntington’s disease.

## INTRODUCTION

Genetic predisposition is an important determinant of chronic disease and disability. Despite the benefits of genetic testing, such as increased screening or prophylactic interventions, individuals at high risk for serious illness may become increasingly fearful or distressed about the future. In fact, a consistent finding is that the majority of individuals do adjust to genetic test results, however a subset of individuals undergoing genetic testing for Adult Onset Hereditary Disease (AOHD) experience psychological distress, such as anxiety or depressive symptoms. A screening tool, designed for the genetic testing context, would be helpful in assisting geneticists, genetic counselors or primary care providers to identify this particular group for the implementation of at appropriate preventive or follow-up interventions. Herein, we present a newly developed psychological risk screening instrument that can be readily used within a genetic service for AOHD.

### **Risk Factors and Psychological Impact of Genetic Testing: The Evidence**

The knowledge of genetic risk is life-long and individuals and families often find themselves confronted with ongoing need to face issues and make decisions. Examples include decision-making around prevention and treatment options (e.g. increased surveillance, prophylactic surgery, chemoprevention), the need to notify family members, and in relation personal decisions, such as those involving childbearing [1, 2]. Studies utilizing standardized measures of distress (e.g. symptoms of anxiety or depression) have demonstrated that 8 to 25% of individuals undergoing genetic testing experience distress, the level of which falls within the clinical ranges for depression and anxiety [2-5]. Studies that have utilized standardized disease specific measures of distress (i.e. instruments measuring breast/ovarian cancer worry) have demonstrated

1  
2  
3 higher prevalence levels [6, 7].  
4

5  
6 The risk factors for psychological symptoms amongst individuals undergoing genetic  
7 testing have been delineated in several studies [4, 8, 9]. While there is generally elevated  
8 distress using global measures for depression or anxiety among those who receive positive test  
9 results [9-11], individuals testing negative or receiving uninformative results may also have  
10 adjustment difficulties [12]. For example, individuals may feel guilt or continue to worry about  
11 their disease risk [2, 7, 12]. These findings highlight the importance of considering risk factors  
12 in addition to the test result itself. Individuals who have elevated psychological symptoms at the  
13 pre-test stage and those with a previous psychiatric history (i.e., depression) are particularly at  
14 risk for an adverse psychological outcome after testing [2, 8, 9].  
15  
16  
17  
18  
19  
20  
21  
22  
23  
24  
25  
26

27 Additional risk factors for distress are more specific to the genetics context and include  
28 the level of penetrance of the gene mutation or degree of certainty of developing the disease [4].  
29 The perception of control over the disease (including the number of prevention/treatment  
30 options) and perception of the immediacy of risk (proximity in age to perceived disease onset)  
31 are important predictors [4, 13]. The expectation of a negative test result can play a role in  
32 adjustment, as can the context of test results of other family members [9, 14]. As in other  
33 medical areas, specific coping styles can affect adjustment [15]. The prior experiences with loss  
34 of family members to disease, as well as the developmental level (i.e. young age) of the  
35 individual at the time of the loss [2, 3, 16] are significant factors affecting potential adjustment.  
36 In addition, the prior experience of giving care to a family member with the disease and lower  
37 levels of social support have been associated with poorer adjustment following a positive test  
38 result [2-4, 8, 16].  
39  
40  
41  
42  
43  
44  
45  
46  
47  
48  
49  
50  
51  
52  
53  
54  
55  
56  
57  
58  
59  
60

1  
2  
3  
4  
5  
6  
7  
8  
9  
10  
11  
12  
13  
14  
15  
16  
17  
18  
19  
20  
21  
22  
23  
24  
25  
26  
27  
28  
29  
30  
31  
32  
33  
34  
35  
36  
37  
38  
39  
40  
41  
42  
43  
44  
45  
46  
47  
48  
49  
50  
51  
52  
53  
54  
55  
56  
57  
58  
59  
60

It is clear that there is not one predominant factor, but rather, a series of variables that may contribute to elevated levels of psychological distress [2, 17]. Emotional reactions may impede the assimilation of risk information and the adoption of preventive measures [2, 18]. Psychological distress occurs along a continuum [19, 20] and can be difficult to identify by health professionals [21]. Distress may not become manifest to the health care team until the patient reaches an observable crisis level, i.e. the onset of severe depression or anxiety, or significant conflicts with the family. An early screening instrument would enable healthcare providers to identify patients being at higher psychological risk in order that appropriate support can be given at the right time. In fact, there is now a general consensus that genetic testing should be accompanied by psychological support to promote optimal adjustment [2, 22].

### **Screening for Psychological Risk Factors- Why is it necessary?**

The gold standard for identifying psychologically distressed individuals involves structured clinical interviews administered by a clinical psychologist or psychiatrist [21]. However, it is too costly and often not feasible in genetic clinics. Standardized measures of psychological functioning (e.g. global scales of depression or anxiety) can also be used as a method for identifying distress. However, few clinics use these measures in practice because of personnel and time requirements for scoring and interpretation of them. Furthermore, these instruments tend to identify global symptoms that are consistent with the diagnostic classifications of anxiety and/or depression and may lack sensitivity to the important and unique issues that surround genetic testing; issues that may include concerns about family members, past experiences with an inheritable disease, and uncertainty about risk reduction options [19, 21]. In addition, items on these measures typically focus on symptoms of anxiety or depression, rather on variables



1  
2  
3 associated with heritable disease or genetic testing or risk, which may pose barriers for use by  
4 genetics health service providers who may prefer instruments that, at face value, appear to them  
5 and their patients as being clinically more relevant to the genetic testing context.  
6  
7  
8  
9

10 More recently, new outcome measures designed to assess the psychological impact of  
11 receiving genetic information have been developed. For example, the Multidimensional Impact  
12 of Cancer Risk Assessment (MICRA) is designed to assess concerns and impacts associated with  
13 genetic testing for BRCA1/2 [19] and another tool, the Psychological Adaptation to Genetic  
14 Information Scale, is now available [23]. While these measures will require further validation  
15 they provide more clinically relevant approaches to capturing specific impacts of genetic  
16 information, such as the increased sense of vulnerability often experienced following genetic  
17 testing [19, 23].  
18  
19  
20  
21  
22  
23  
24  
25  
26  
27  
28

29 Measures of global psychological functioning and the evolving outcome measurement  
30 tools for the genetics field are not designed to “predict” vulnerability for future distress, but  
31 rather, measure current distress levels. Screening, the aim of the tool developed in this study in  
32 contrast, is a rapid, cost-effective alternative [21] to prospectively identify individuals who may  
33 experience significant difficulty in their attempts to adapt to their genetic information [17]. A  
34 screening tool enables providers to offer timely and focused educational and psychosocial  
35 interventions to *prevent* future distress.  
36  
37  
38  
39  
40  
41  
42  
43  
44  
45

46 The primary *objective* of this study was to develop a brief, reliable and valid  
47 psychological risk screening instrument for use in the genetic testing context. The new  
48 instrument aimed to incorporate empirically based risk factors for psychological symptoms and  
49 would need to show a high sensitivity, specificity and predictive validity indicating risk for  
50 future distress post genetic testing results. A cutoff point would need to be determined to guide  
51  
52  
53  
54  
55  
56  
57  
58  
59  
60

1  
2  
3 clinical decisions as to whether or not to refer, further assess, or intervene to reduce an  
4 individual's expressed concern.  
5  
6  
7  
8  
9

## 10 **METHODS AND MATERIALS**

11  
12 The study was carried out from September 2005 to July 2010, with research ethics board  
13 approval from participating genetics clinics: Toronto (Mount Sinai Hospital, North York General  
14 Hospital, Princess Margaret Hospital); Ottawa (Children's Hospital of Eastern Ontario); and  
15 Vancouver (British Columbia Cancer Agency). Individuals beginning the genetic testing process  
16 for AOHD at each site were approached by genetic counsellors on the project team for their  
17 permission to be contacted about the study. Those who expressed interest were mailed the  
18 baseline package that included the informed consent. The informed consent included all  
19 components of the study, including questionnaires, follow-up phone calls, telephone interviews,  
20 as well as to the release of their genetic testing information to the research team.  
21  
22  
23  
24  
25  
26  
27  
28  
29  
30  
31  
32  
33

34 A two phase approach was used for this study: **Phase I: Item Generation and Refinement**,  
35 and **Phase II: Validation**. The multi-stage method [24] takes validation into consideration at  
36 each stage of scale development and has been used successfully in previous studies [25].  
37  
38  
39  
40  
41  
42

### 43 **Phase I: Item Generation and Refinement.**

#### 44 ***Item generation***

45  
46 To generate items for the Genetic Psychosocial Risk Instrument (GPRI), a literature search was  
47 performed for the following AOHDs: Cancer (Hereditary Breast-Ovarian Cancer Syndrome/  
48 Lynch Syndrome), Huntington Disease (HD), and Hemochromatosis. These diseases were  
49 selected as they represented the majority of patients attending genetic clinics and had an  
50  
51  
52  
53  
54  
55  
56  
57  
58  
59  
60

1  
2  
3 associated available psychosocial literature for review. Databases including Cinahl (1982 to  
4 2006), Medline (1966 to 2006), PsychInfo (1985 to 2006), and Pubmed (1985 to 2006) were  
5 searched as well as hand search of references from major publications. Keywords included:  
6 genetic screening, genetic testing, psychological, psychological well-being, psychological  
7 adjustment, stress, adaptation, cancer worry, disease worry, and distress. Selection criteria for the  
8 literature review included studies with a follow-up design or review articles. Each selected study  
9 was reviewed by two reviewers on its quality of evidence and generalizability using a  
10 standardized template. A total of 73 relevant studies were identified among the disease groups:  
11 49 on cancer, 20 on HD, 2 on Hemochromatosis, and 2 described mixed conditions.  
12  
13  
14  
15  
16  
17  
18  
19  
20  
21  
22  
23  
24

25 Risk factors for psychological distress identified by the literature review provided the  
26 basis for item generation. Items were written in a mixed format where respondents were asked  
27 for their endorsement of each statement ranging from Yes/No for risk factors of binary nature, to  
28 a 5-point likert-type scale for risk factors with stages in frequency and/or intensity. The  
29 instrument items were further refined by 10 genetic service providers (3 geneticists, 4 genetic  
30 counselors, 2 oncologists, 1 genetics nurse) rating items on *comprehension, readability, and*  
31 *perceived clinical relevance* using a ten-point scale with 0 being "excellent/definitely relevant"  
32 and 10 being "very poor/definitely not relevant". Risk factor items were removed if rated above  
33 five by more than 3 providers. Providers were also asked to suggest additional risk factor items.  
34 These suggestions were checked against the literature for empirical evidence. Following this  
35 step, 7 volunteers undergoing genetic testing for AOHDs were recruited to try out the scale for  
36 clarity, succinctness and relevance from the clients' perspectives. At this stage, the proposed  
37 instrument consisted of 56 items: demographics (4 items); perceived risk (8 items); life events  
38 and family history of the disease (8 items); perceived impact of carrying a mutation (9 items);  
39  
40  
41  
42  
43  
44  
45  
46  
47  
48  
49  
50  
51  
52  
53  
54  
55  
56  
57  
58  
59  
60

1  
2  
3 family communication (6 items); disease specific concerns (5 items); optimism (3 items); social  
4 support (3 items), pre-morbid functioning and previous psychiatric history (10 items).  
5  
6  
7  
8  
9

### 10 ***Item refinement:***

11  
12 Subjects: Following informed consent, a convenient sample of 141 participants who had given  
13 blood for genetic tests at the Toronto and Ottawa sites completed the GPRI (using a three  
14 patients per item ratio) to select the best items for the candidate scale. The participants were  
15 middle aged ( $48.67 \pm 13.29$ ), mostly female (77%) testing for hereditary breast cancer, and many  
16 (65%) had already suffered the onset of the illness.  
17  
18  
19  
20  
21  
22  
23

24 Scoring: To ensure that binary items carry an equal weight as the 5-point likert-type  
25 items, a score of 5 was assigned to *Yes* and 1 to *No*. A score of 3 or mean-substitute was assigned  
26 to *Not Applicable* to allow it to be counted in the total score. Reliability analysis was carried out  
27 and a Cronbach's Alpha was set for .75 or higher for the scale to move to the next phase [26].  
28 Any item with an item-total correlation less than .20 was identified for potential removal. Using  
29 team consensus, a total of 19 items were removed, combined or substituted, resulting in a 37  
30 item GPRI candidate scale at the end of phase I.  
31  
32  
33  
34  
35  
36  
37  
38  
39  
40  
41  
42

### 43 **Phase II: Scale Validation**

44  
45 Subjects: Individuals undergoing genetic testing for one of the AOHDs in each of the five study  
46 sites were invited to participate: 1) age 18 or above undergoing genetic testing for cancer, HD, or  
47 Hemochromatosis; 2) fluent in English; and 3) residing within 1.5 hours driving distance from  
48 study site. Although the onset of an AOHD was not an exclusion criterion, individuals in  
49 advanced stages of the illness and / or who were unable to consent due to cognitive impairment  
50  
51  
52  
53  
54  
55  
56  
57  
58  
59  
60

1  
2  
3 were excluded. At baseline, participants were asked to complete a set of self-report  
4  
5 questionnaires (e.g. Brief Symptom Inventory, etc.) described below within a one month period  
6  
7 following the provision of a blood sample. For those who received a genetic test result,  
8  
9 questionnaires were mailed within two weeks to one month of the disclosure of test result. These  
10  
11 participants were also telephoned to complete the Hamilton Depression and Hamilton telephone-  
12  
13 based Anxiety Scales to further assess depressive and anxiety symptoms. .  
14  
15

16  
17 Materials: At baseline, three psychosocial measures were used: GPRI Candidate Scale  
18  
19 from Phase I. To facilitate scoring of the scale by genetic providers, scores for response to each  
20  
21 item on the GPRI were imbedded in the questionnaire, where clinicians could calculate a total  
22  
23 score in less than 5 minutes. Brief Symptom Inventory (BSI) The BSI is a 53-item measure of  
24  
25 psychological distress that contains three global scales i) depression, ii) anxiety and iii)  
26  
27 somatization [27]. It is widely used in medical and psychiatric populations to assess  
28  
29 psychological functioning; Impact of Event Scale (IES): The IES is a 15-item, likert-style scale  
30  
31 used to assess the experience of a specific stress response and is designed to be easily anchored  
32  
33 in relation to a specific stressor or life event. As previously utilized in the genetics literature to  
34  
35 assess genetic testing-related distress, the IES items were anchored in relation to the event of  
36  
37 “the genetic test result”. The IES has two sub-scales: i) intrusive thoughts and feelings associated  
38  
39 with the stressful life event, and ii) items associated with patterns of avoidance of certain  
40  
41 thoughts, feelings, or situations [28].  
42  
43  
44  
45  
46  
47

48  
49 Measures at one month post genetic testing results included: the self -reports scales of the  
50  
51 BSI, IES and each participant received a telephone call for the telephone-based Hamilton  
52  
53 Depression 29-item Rating Scale (HAM-D) and Hamilton Anxiety Rating Scale (HAM-A). The  
54  
55 HAM-D evaluates depressed mood, vegetative and cognitive symptoms of depression, and  
56  
57  
58  
59  
60

1  
2  
3 comorbid anxiety symptoms [29]. The HAM-A quantifies the severity of anxiety  
4  
5  
6  
7  
8  
9  
10  
11  
12  
13  
14  
15  
16  
17  
18  
19  
20  
21  
22  
23  
24  
25  
26  
27  
28  
29  
30  
31  
32  
33  
34  
35  
36  
37  
38  
39  
40  
41  
42  
43  
44  
45  
46  
47  
48  
49  
50  
51  
52  
53  
54  
55  
56  
57  
58  
59  
60

comorbid anxiety symptoms [29]. The HAM-A quantifies the severity of anxiety symptomatology and consists of 14 items. The HAM-D and HAM-A have demonstrated validity in clinical interview, in person or by telephone [30]. These two instruments were selected as main outcome measures based on the literature that the standardized interview based-rating scales should be used over subjective report scales as the principal outcome criterion in psychological distress both in general practice and in research trials [34]. Cases would be defined by established cut-offs from the literature for HAM-D  $\geq 12$  [35] or HAM-A  $\geq 10$  [36]. These cut off points were established for populations in general practice, which was our study population.

The one-month follow-up time point was selected as it is when elevated distress might occur [31]. In addition, the 2-week duration criterion for depression defined by the Diagnostic and Statistical Manual of Mental Disorders, Fourth Edition (DSM-IV) is met by this time frame.

### Assessing Psychometric Property of the Scale

As a first step, items were required to have at least an 80% response rate. Second, each item was examined to determine its contribution to the internal consistency of the total 37-item scale. The minimum item-total correlation was set at .20 [32].

A principal components factor analysis with varimax rotation was performed on the candidate scale to examine the factor structure and the loading of the items. To assess the *convergent validity* of the candidate scale, the correlations between baseline GPRI, IES and BSI were calculated. To assess the *sensitivity, specificity and predictive value* of the GPRI, the follow-up HAM-D and HAM-A were used to identify “cases” who met cut offs for either the depression or anxiety symptomatology. For example, participants with a high GPRI at baseline

1  
2  
3 would be classified as “at risk” for future onset of adjustment difficulties. This would be  
4 confirmed by a high HAM-D or HAM-A score or “case” during 1 month follow-up. Similarly,  
5 those with a low GPRI score should receive low score in HAM-D or HAM-A as “non-cases”.  
6  
7 The predictive value of the GRPI, describing the number of test-positives (in our case, high  
8 GPRI) who truly have the psychological condition (i.e. cases identified by HAM-D or HAM-A),  
9 was tested by a Receiver Operating Characteristic (ROC) curve which visually plotted the true  
10 positive rate (sensitivity) over false positive rate (1-specificity). We included cases to be  
11 identified by either anxiety and/or depressive symptomatology as both have been reported in the  
12 literature [8, 9].  
13  
14  
15  
16  
17  
18  
19  
20  
21  
22  
23

24 To address the issue of missing follow-up data in a cohort study, as suggested in the  
25 literature [33], we tested the assumption that the sub sample with missing data had a similar  
26 baseline exposure (similar GPRI) as the non-missing subsample by comparing baseline GPRI  
27 between the participants and dropouts. This step assesses if there was systematic bias resulting  
28 from the loss of information in the follow-up period.  
29  
30  
31  
32  
33  
34  
35  
36  
37  
38

## 39 RESULTS

### 40 Participant characteristics

41 Study packages were mailed to 1129 individuals interested in hearing more about the study. Of  
42 these individuals, 722 of them consented and 712 (98%) completed the GPRI. Most participants  
43 were tested for the inheritable cancers, while a small percentage of participants were tested for  
44 hemochromatosis and HD. Similar to phase I, phase II participants were mostly female, at mid-  
45 life stage, and more than half had a past diagnosis of the disease (see table 1).  
46  
47  
48  
49  
50  
51  
52  
53  
54

55 **Insert Table 1 about Here**  
56  
57  
58  
59  
60

1  
2  
3 Of the 712 participants, 85 (12%) did not receive genetic testing results at the scheduled  
4 follow-up time and were not eligible for follow-up measures on psychological symptoms in  
5 response to a genetic testing result. Of the remaining 627 participants, 152 (24%) did not return  
6 the self-administered follow-up questionnaires and 12 (2%) submitted the follow-up  
7 questionnaire package but did not complete a standardized telephone interview using HAM-D  
8 and HAM-A (up to 4 telephone calls were made to reach each participant). Therefore the final  
9 number of participants with complete follow-up data is 463 (74%). The age, and baseline GPRI  
10 score between individuals who did not receive genetic testing results (age  $51.4 \pm 12.7$ , GPRI  
11  $49.3 \pm 12.7$ ), those who did not return the follow-up questionnaires (age  $48.1 \pm 11.6$ , GPRI  
12  $50.2 \pm 14.4$ ) and those who completed follow-up measures (age  $50.1 \pm 12.8$ , GPRI  $49.1 \pm 13.5$ ) were  
13 compared. There was no statistically significant group difference (ANOVA and all post-hoc  
14 comparisons  $p > 0.05$ ).

15  
16 Because of the similarity between the dropouts and completers, we proceeded with  
17 reliability and validity analysis of the tool using the subsample that provided outcome data.

18  
19 We carried out the calculations for distress level, for example, for depression and anxiety  
20 symptoms using the BSI data, for specific distress associated a genetic test result using the IES.  
21 Approximately, 13.0% to 20.1% of participants reached the threshold of moderate to severe  
22 distress respectively (see table 2).

#### 23 24 25 26 27 28 29 30 31 32 33 34 35 36 37 38 39 40 41 42 43 44 45 46 47 48 49 50 51 52 53 54 55 56 57 58 59 60

**Insert Table 2 about Here**

HAM-D and HAM-A interview data from 463 participants were used as a further  
validation tool to measure psychological symptoms post genetic testing results. Defined by cut-  
offs for HAM-D  $\geq 12$  [35] or HAM-A  $\geq 10$  in the literature [36], the rates for psychological



1  
2  
3 distress of either depression or anxiety was 13.7% (N=63). The rate was 13% for HD, 15% for  
4  
5 breast cancer and 7% for Lynch Syndrome.  
6  
7  
8  
9

### 10 **Reliability and Factor Analysis**

11  
12 A reliability analysis was performed on 37 items. Twenty items belonging to 18 questions were  
13  
14 selected based on the criteria for item selection described in the methods section. The  
15  
16 Cronbach's alpha of the 20 item GPRI was 0.81 suggesting a good level of internal consistency.  
17  
18

19  
20 The factor analysis resulted in a psychometrically sound 3-factor solution, with subscales  
21  
22 representing the dimensions of: 1) *Perceived impact and personal adjustment to genetic testing*  
23  
24 (12 items); 2) *Past history of mental health concerns* (5 items) and 3) *Personal history/family*  
25  
26 *history/loss to cancer* (3 items). All three factors met the minimum Eigenvalue criteria of 1.  
27  
28

29  
30 The first, 12-item factor (ALPHA = 0.85), accounting for 22% of the variance, includes  
31  
32 items associated with the anticipated or experienced impact of being at high risk for AOHD.  
33  
34 Example items included: "My worries about the disease affect my daily mood"; "The disease for  
35  
36 which I am at risk is currently causing a significant disruption in my family life".  
37  
38

39  
40 The second 5-item factor (ALPHA = 0.76), accounted for an additional 14% of the total  
41  
42 variance, and reflected a sense of a person's past history or vulnerability in the area of mental  
43  
44 health , e.g. "I have had emotional problems in the past", These items have been used in other  
45  
46 medical health areas [37, 38] and tend to be predictive of maladjustment [20] following a life  
47  
48 event.  
49

50  
51 The third 3 item factor (ALPHA = 0.08), accounted for 8% of the total variance and  
52  
53 pertained to personal or family-related experiences associated with the heritable disorder for  
54  
55 which the participant is undergoing testing. . Examples include: "I have a personal diagnosis of  
56  
57  
58  
59  
60

1  
2  
3 the disease for which I am receiving counseling”; “I lost a close family member to the disease for  
4 which I am receiving counseling”; and “I have taken care of a very ill parent or another close  
5 family member”. These 3 final items had low item total correlation because they were different  
6 from the rest of the items in that they focused on direct experiences related to the illness, rather  
7 than psychosocial-related items. These items were kept in the scale as they contributed  
8 significantly to the overall variance, and correlated highly with HAM-D and HAM-A. To  
9 determine the relationships between the three factors/subscales, correlations were computed.  
10 Factor1 and factor2 had moderate correlations with each other (factor1/factor2  $r=0.30$ ,  $p<0.01$ ).  
11 The correlation of the first two factors with factor3 was much lower as expected (factor1/factor3  
12  $r=0.06$ , and factor2/factor3  $r=0.01$ , not statistically significant). These results support the  
13 multidimensional character of the GPRI scale (see Table 3).  
14  
15  
16  
17  
18  
19  
20  
21  
22  
23  
24  
25  
26  
27  
28

29  
30 **Insert Table 3 about Here**

31  
32 One additional statement “I am interested in talking to a counselor about one or more of  
33 these concerns” was added to the tool at the end as suggested by participants and providers to  
34 remind them the option of seeing a counselor if required. This statement is not part of the items  
35 examined during the instrument development and therefore does not carry a score.  
36  
37  
38  
39

40  
41 The total score for the 20 item GPRI ranged from 20 to 100, with a sample mean  
42  $49.36\pm 13.23$ . The total was calculated by the sum of the raw scores for each of the statements.  
43 Females had a significantly higher score for the GPRI than males ( $50.37\pm 13.14$  vs.  $41.91\pm 11.47$ ,  
44  $p<0.01$ ), and participants testing for HD had a higher, but non-significant score than participants  
45 testing for cancer ( $52.24\pm 13.24$  vs.  $49.37\pm 13.22$ , n.s.).  
46  
47  
48  
49  
50  
51  
52  
53  
54  
55  
56  
57  
58  
59  
60

## Validity

Construct validity – correlations: The GPRI was assessed for its correlation with other standardized self-report measures of psychological functioning collected at baseline. Convergent validity was demonstrated by the correlation between the GPRI and the following measures: a positive correlation with the IES total score at  $r = .51, p < .001$ , and with BSI at  $r = .58, p < .001$ .

Sensitivity, specificity and the predictive value of GPRI for future distress: The telephone interview-based HAM-D and HAM-A were used to identify subjects who presented specific psychological symptoms of distress such as depression and/or anxiety during the one month post genetic testing follow-up. A total of 63 “cases” (13.6% of 463 completers) were identified as having psychological distress levels above specified thresholds defined in the methods section for either anxiety or depression symptoms or both. About 23% among participants testing positive met the distress threshold, as did 10% among those with negative results, and 20% among uninformative. Participants scoring above HAM-D (N=55) threshold had significantly higher GPRI scores than participants below the threshold (N=408) ( $61.12 \pm 13.27$  vs.  $47.91 \pm 12.27, p < 0.01$ ). Same patterns were observed for HAM-A high (N=40) vs. low (N=423) ( $62.53 \pm 12.92$  vs.  $48.25 \pm 12.43, p < 0.01$ ).

Other demographic characteristics of these 63 subjects include: most were female and undergoing testing for BRCA1/2, which was similar to the whole sample of 712 (table 1). Compared with the whole sample, these subjects had a slightly higher percentage of personal history of cancer (65% vs. 62%), higher rate of recent significant event of loss (56% vs. 47%), greater percentage reporting disease worries affecting mood (54.8% vs. 27%), having a feeling of sadness in the past month (46% vs. 17%) and anxiousness in the past month (33% vs. 17%). Our instrument captured all of these characteristics of this subsample.

1  
2  
3  
4  
5  
6  
7  
8  
9  
10  
11  
12  
13  
14  
15  
16  
17  
18  
19  
20  
21  
22  
23  
24  
25  
26  
27  
28  
29  
30  
31  
32  
33  
34  
35  
36  
37  
38  
39  
40  
41  
42  
43  
44  
45  
46  
47  
48  
49  
50  
51  
52  
53  
54  
55  
56  
57  
58  
59  
60

The predictive value of a test describes how many of the test-positives (in this case, a high score on GPRI) truly have the psychological condition. An ROC curve was used to plot the true positive rate (sensitivity) over the false positive rate (1-specificity). A good ROC curve rises sharply, indicating a high proportion in true positive and a low proportion of false positives. The ROC curve for the GPRI was 0.78, which is considered as an indicator of an adequate screening instrument [39].

An important purpose of the GRPI in our study was to identify individuals at risk for post genetic testing psychological distress. Therefore, the cutoff value was set to maximize sensitivity – in another word, not to miss detecting a “case”. Using a GPRI cut off score of 50, the instrument was able to predict 84% of the “cases” identified by HAM-D or HAM-A conducted post genetic testing results, with a specificity value of 60% (Figure 1).

**Insert Figure 1 about Here**

## DISCUSSION

The aim of this study was to develop a brief, easy-to-use psychosocial screening instrument specific for the genetic testing context and to examine its reliability and validity (Appendix A). To our knowledge this is the first report of a psychosocial screening instrument for use across AOHD. Unlike current psychological instruments used mainly in research studies in genetics clinics to identify existing global symptoms of depression and anxiety, or impacts, the GPRI assesses *psychological risk factors*, such as the specific anticipated impacts of a genetic testing result and the perception of the disease. The GPRI demonstrates promising psychometric properties as a tool designed to assist genetics health care providers determine which of their

1  
2  
3 patients undergoing genetic testing for AOHD is at increased psychological risk and should  
4  
5 likely be considered for additional psychosocial support to facilitate adjustment to a test result.  
6  
7

8 A high reliability was demonstrated by a Cronbach's Alpha at 0.81, moderate to high  
9  
10 item-total correlation and inter-item correlation of the whole scale. The construct validity of the  
11  
12 scale was supported by high correlations between the GPRI and standardized psychological  
13  
14 measures (BSI, IES). The clinical utility and predictive value of the GPRI was supported as  
15  
16 well. A GPRI score above the cutoff of 50 at baseline was able to predict 84% of “distress” cases  
17  
18 identified by HAM-D or HAM-A, a strong indicator of its potential usefulness in a clinical  
19  
20 setting.  
21  
22  
23

24 A brief self-administered screening tool will be easy and likely highly acceptable for  
25  
26 incorporation into genetics clinics. The GPRI can be completed and scored quickly during  
27  
28 clinical visits and without additional burden to patients and health providers. In addition, by  
29  
30 focusing specifically on known risk factors associated with inheritable illness, the instrument  
31  
32 will be perceived as being more clinically relevant and acceptable to patients. Patients with  
33  
34 higher GPRI scores can be flagged and either receive telephone follow-up to further assess  
35  
36 concerns or potential distress or be invited back for an appointment for further assessment and  
37  
38 required psychological treatment.  
39  
40  
41  
42

43 Alternatively, genetic clinics with available psychosocial personnel could utilize the tool  
44  
45 to guide referrals for a formal psychosocial assessment that can further explore and address  
46  
47 specific self-reported psychological factors. For example, in the case where an individual is  
48  
49 particularly fearful of developing an illness or is concerned about specific impacts, such as  
50  
51 expecting relationship or family communications difficulties, information on communication  
52  
53 strategies, personal coaching or family-based interventions could be employed to support the  
54  
55  
56  
57  
58  
59  
60

1  
2  
3 individual. For an individuals who reports a past history of psychological illness, a mental health  
4 professional could further assess current psychological functioning and implement specific  
5 approaches, and could offer cognitive-behavioral strategies or psychotropic medication to assist  
6 in the management of anxiety or depressive symptoms [40]. Several items incorporate variables  
7 related to heritable disease experiences and associated perceptions which can be used to guide  
8 educational interventions to correct any myths or beliefs.  
9

10  
11 The scale appeared highly acceptable to patients. A high face validity will contribute to  
12 better scale uptake being perceived as “user friendly” and clinically relevant, compared for  
13 example, to a standardized psychological instrument on depression, which have demonstrated  
14 some barriers to clinic uptake [19]. The GPRI in contrast might be considered as a  
15 “communimetric measure”, that is, the items themselves are useful for the clinician in  
16 communicating concerns about specific areas of functioning directly with the patient [41].  
17

18  
19 Left untreated, significant levels of psychological symptoms may lead to lower quality  
20 of life [40], and lower satisfaction with genetics services [21]. A psychological screening  
21 approach allows both for careful monitoring during a known stressful period-that of awaiting test  
22 results [42], and provides an opportunity for any planned follow-up care. Flagging those  
23 individuals who might benefit most from psychosocial care also best utilizes the often limited  
24 psychological resources in genetic clinics [2, 20, 21].  
25

26  
27 Our study findings are limited by the characteristics of the sample, in that most  
28 participants were female and undergoing testing for *BRCA1/2*. This pattern is similar to that  
29 observed in the literature on genetic testing for AOHD, which is predominantly focused on  
30 Hereditary Breast-Ovarian Cancer Syndrome. We attempted to obtain a larger sample of  
31 individuals undergoing genetic testing for HD or Lynch Syndrome which would presumably  
32  
33  
34  
35  
36  
37  
38  
39  
40  
41  
42  
43  
44  
45  
46  
47  
48  
49  
50  
51  
52  
53  
54  
55  
56  
57  
58  
59  
60

1  
2  
3 provide a greater sample of males. However, these sample pools were much smaller. However,  
4  
5 this study and the resulting GPRI represent an attempt to begin the development of a general tool  
6  
7 that addresses concerns that are relevant across genetic samples. Our belief stemming from  
8  
9 clinical practice and the associated literature suggest that the identified mental health issues or  
10  
11 adjustment risk factors are not disease specific. We suggest that future studies further address the  
12  
13 validity of GPRI in male populations and in the rare adult onset hereditary diseases, such as HD.  
14  
15 Future studies should also include randomized controlled trials to assess the effectiveness of the  
16  
17 GPRI in predicting distress, its impact on referral patterns, patient and provider satisfaction, as  
18  
19 well as on cost-effectiveness. The GPRI could also be evaluated in primary care settings where  
20  
21 genetics services might be offered more frequently to meet the demand.  
22  
23  
24  
25  
26  
27  
28

## 29 **CONCLUSIONS**

30  
31 This is the first study to develop a screening tool specifically to help identify individuals  
32  
33 undergoing genetic testing for AOHD who are at increased psychological risk. The study  
34  
35 resulted in an easy to use, 20-item scale consisting of 3 factors with promising psychometric  
36  
37 properties. The GPRI has the potential to be used as a clinical screening tool and as a validated  
38  
39 measure for future studies. Future work can examine its impact on clinical referral patterns  
40  
41 within the field of genetics, and on its acceptability, reliability and validity with larger samples  
42  
43 of individuals undergoing genetic testing for HD, Lynch Syndrome, and potentially for emerging  
44  
45 new genetic tests, such as for cardiac or psychiatric disorders.  
46  
47  
48  
49  
50  
51  
52  
53  
54  
55  
56  
57  
58  
59  
60

## Acknowledgement

The first author is a recipient of a career scientist award from the Canadian Institutes of Health Research (CIHR) and the Ontario Women's Health Council. This study was funded by Canadian Institutes of Health Research (CIHR) Grant No. AHC 73144. We would like to express our gratitude to all the genetic testing patients who participated in our study. Thank you for your contribution towards this very important work and the development of the instrument. Thank you also to the genetic counselors and clinic staff from the participating genetic centers who assisted in recruitment: Children's Hospital of Eastern Ontario (Eastern Ontario Regional Genetics Centre); North York General Hospital (Clinical Genetics); Mount Sinai Hospital (Familial GI Cancer Registry & Familial Breast Cancer Clinic); Princess Margaret Hospital (Familial Breast & Ovarian Cancer Clinic); and BC Cancer Agency (Hereditary Cancer Program). We would also like to thank the research staff for their commitment and hard work to complete this national multi-site study. Finally, the team would like to pay special recognition to the late Dr. Anne Summers, who was co-investigator on the team. Her dedication to the need for empirically based tools and her strong vision to support recipients of new genetic technology were key influences in the conceptualization, funding and completion of this study.

**Ethics:** Research Ethics Board approval was obtained at all five participating sites: Toronto (Mount Sinai Hospital, North York General Hospital, Princess Margaret Hospital); Ottawa (Children's Hospital of Eastern Ontario); and Vancouver (British Columbia Cancer Agency).

**Data Sharing Statement:** There is no additional data available

**Conflict of Interest:** The authors do not have any conflict of interest to disclose.

**Funding:** This study was funded by Canadian Institutes of Health Research (CIHR) Grant No. AHC 73144.



## Contributorship Statements

### Dr. Mary Jane Esplen

Principal Applicant responsible for leading all aspects of the research, oversees budget, hiring staff, supervising data collection, analysis and interpretation, and writing of all manuscripts and reports.

### Dr. Mario Cappelli

Co-principal inv. responsible for assisting in item generation and refinement, the implementation of data collection, interpretation of findings and writing of manuscripts and reports.

### Dr. Jiahui Wong

Co- Applicant responsible assisting in instrument development, statistical procedures, sampling and interpretation of findings and writing of manuscripts and reports.

### Dr. Joan Bottorff

Co-Applicant responsible for refining of items, guiding the recruitment of providers and testing of the instrument in genetic services, development of guidelines and writing of manuscripts and reports.

### Dr. Jon Hunter

Co-Applicant responsible for assisting in item generation and refinement, guideline development, interpretation of findings and writing of manuscripts and reports.

### Dr. June Carroll

Co-Applicant responsible for assisting in item generation and refinement, implementation of the screening validation strategy and development of guidelines, interpretation of findings and writing of manuscripts and reports.

### Dr. Michel Dorval

Co-Applicant responsible for refining of items, guiding the recruitment of providers and testing of the instrument in genetic services, interpretation of findings and writing of manuscripts and reports.

**Dr. Brenda Wilson**

Co-Applicant responsible for co-leading the implementation of the consensus guidelines components of the proposed study. Will assist in item generation for tool, interpretation of findings, writing of manuscripts and reports.

**Dr. Judith Allanson**

Co-Applicant responsible for refining of items, guiding the recruitment of providers/patients and testing of the instrument in genetic services, development of guidelines and writing of manuscripts and reports.

**Ms. Kara Semotiuk**

Co-Applicant responsible for refining of items, guiding the recruitment of providers and testing of the instrument in genetic services and development of guidelines, and writing of manuscripts and reports.

**Ms. Melyssa Aronson**

Co-Applicant responsible for refining of items, guiding the recruitment of providers and testing of the instrument in genetic services, development of guidelines and writing of manuscripts and reports.

**Dr. Louise Bordeleau**

Co-Applicant responsible for overseeing recruitment at MSH and UHN site in Toronto, testing of instrument and interpretation of findings, writing of manuscripts and reports.

**Ms. Nicole Charlemagne**

Project coordinator, responsible for: patient recruitment and follow-up; assisting in item generation, refinement, and overall layout and design of tool; data collection, data entry, and data clean-up; revisions and submission of manuscript.

**Dr. Wendy Meschino**

Co-Applicant responsible for refining of items, guiding the recruitment of providers and testing of the instrument in genetic services, interpretation of findings and writing of manuscripts and reports.

## REFERENCES

1. Lerman C, Croyle RT. Emotional and behavioral responses to genetic testing for susceptibility to cancer. *Oncology (Williston Park)*. 1996;**10**:191-5, 9; discussion 200-2.
2. Bleiker EM, Hahn DE, Aaronson NK. Psychosocial issues in cancer genetics--current status and future directions. *Acta Oncol*. 2003;**42**:276-86.
3. Wellisch DK, Lindberg NM. A psychological profile of depressed and nondepressed women at high risk for breast cancer. *Psychosomatics*. 2001;**42**:330-6.
4. Broadstock M, Michie S, Marteau T. Psychological consequences of predictive genetic testing: a systematic review. *Eur J Hum Genet*. 2000;**8**:731-8.
5. Ho SM, Ho JW, Bonanno GA, et al. Hopefulness predicts resilience after hereditary colorectal cancer genetic testing: a prospective outcome trajectories study. *BMC Cancer*. 2010;**10**:279.
6. Trask PC, Paterson AG, Wang C, et al. Cancer-specific worry interference in women attending a breast and ovarian cancer risk evaluation program: impact on emotional distress and health functioning. *Psychooncology*. 2001;**10**:349-60.
7. Coyne JC, Kruus L, Racioppo M, et al. What do ratings of cancer-specific distress mean among women at high risk of breast and ovarian cancer? *Am J Med Genet A*. 2003;**116A**:222-8.
8. Marteau TM, Croyle RT. The new genetics. Psychological responses to genetic testing. *BMJ*. 1998;**316**:693-6.
9. Meiser B. Psychological impact of genetic testing for cancer susceptibility: an update of the literature. *Psychooncology*. 2005;**14**:1060-74.
10. Hamilton JG, Lobel M, Moyer A. Emotional distress following genetic testing for hereditary breast and ovarian cancer: a meta-analytic review. *Health Psychol*. 2009;**28**:510-8.
11. Shaw C, Abrams K, Marteau TM. Psychological impact of predicting individuals' risks of illness: a systematic review. *Soc Sci Med*. 1999;**49**:1571-98.

- 1  
2  
3  
4  
5  
6  
7  
8  
9  
10  
11  
12  
13  
14  
15  
16  
17  
18  
19  
20  
21  
22  
23  
24  
25  
26  
27  
28  
29  
30  
31  
32  
33  
34  
35  
36  
37  
38  
39  
40  
41  
42  
43  
44  
45  
46  
47  
48  
49  
50  
51  
52  
53  
54  
55  
56  
57  
58  
59  
60
12. Dorval M, Gauthier G, Maunsell E, et al. No evidence of false reassurance among women with an inconclusive BRCA1/2 genetic test result. *Cancer Epidemiol Biomarkers Prev.* 2005;**14**:2862-7.
  13. Cameron LD, Sherman KA, Marteau TM, et al. Impact of genetic risk information and type of disease on perceived risk, anticipated affect, and expected consequences of genetic tests. *Health Psychol.* 2009;**28**:307-16.
  14. Smith KR, West JA, Croyle RT, et al. Familial context of genetic testing for cancer susceptibility: moderating effect of siblings' test results on psychological distress one to two weeks after BRCA1 mutation testing. *Cancer Epidemiol Biomarkers Prev.* 1999;**8**:385-92.
  15. Dougall AL, Smith AW, Somers TJ, et al. Coping with genetic testing for breast cancer susceptibility. *Psychosom Med.* 2009;**71**:98-105.
  16. Esplen MJ, Urquhart C, Butler K, et al. The experience of loss and anticipation of distress in colorectal cancer patients undergoing genetic testing. *J Psychosom Res.* 2003;**55**:427-35.
  17. Zabora JR. Screening procedures for psychological distress. In: Holland JC, editor. *Psycho-Oncology*. New York: Oxford University Press; 1998. p. 653-62.
  18. Watson M, Lloyd S, Davidson J, et al. The impact of genetic counselling on risk perception and mental health in women with a family history of breast cancer. *Br J Cancer.* 1999;**79**:868-74.
  19. Cella D, Hughes C, Peterman A, et al. A brief assessment of concerns associated with genetic testing for cancer: the Multidimensional Impact of Cancer Risk Assessment (MICRA) questionnaire. *Health Psychol.* 2002;**21**:564-72.
  20. Zabora J, BrintzenhofeSzoc K, Curbow B, et al. The prevalence of psychological distress by cancer site. *Psychooncology.* 2001;**10**:19-28.
  21. Thewes B, Meiser B, Tucker K, et al. Screening for psychological distress and vulnerability factors in women at increased risk for breast cancer: A review of the literature. *Psychology, Health & Medicine.* 2003;**8**:289-303.
  22. Howell D, Keller-Olaman S, Oliver T, et al. A Pan-Canadian Practice Guideline: Screening, Assessment and Care of Psychosocial Distress (Depression, Anxiety) in Adults with

1  
2  
3 Cancer. Toronto: Canadian Partnership Against Cancer (Cancer Journey Action Group) and the  
4 Canadian Association of Psychosocial Oncology 2010.  
5  
6

7  
8 23. Read CY, Perry DJ, Duffy ME. Design and psychometric evaluation of the Psychological  
9 Adaptation to Genetic Information Scale. *J Nurs Scholarsh*. 2005;**37**:203-8.  
10

11  
12 24. Jackson D. A sequential system for personality scale development. In: Spielberger C,  
13 editor. *Current Topics in Clinical and Community Psychology*. New York: Academic Press;  
14 1970. p. 61-96.  
15

16  
17  
18 25. Stuckless N, Goranson R. The vengeance scale: Development of a measure of attitudes  
19 toward revenge. *Journal of Social Behavior and Personality*. 1992;**7**:25-42.  
20

21  
22 26. Briggs SR, Cheek JM. The role of factor analysis in the development and evaluation of  
23 personality scales. *Journal of Personality*. 1986;**54**:106-48.  
24

25  
26  
27 27. Derogatis LR. The brief symptom inventory (BSI). Administration, Scoring and  
28 Procedures Manual. 3rd ed. New York: National Computer Systems; 1993.  
29

30  
31 28. Horowitz MJ, Wilner N, Alvarez W. Impact of Events Scale: A Measure of Subjective  
32 Stress. *Psychosomatic Medicine*. 1979;**41**:209-18.  
33

34  
35  
36 29. Hamilton MA. A rating scale for depression. *Journal of Neurology, Neurosurgery and*  
37 *Psychiatry*. 1960;**23**:56-23.  
38

39  
40 30. Katzelnick DJ, Simon GE, Pearson SD, et al. Randomized trial of a depression  
41 management program in high utilizers of medical care. *Arch Fam Med*. 2000;**9**:345-51.  
42

43  
44 31. DudokdeWit AC, Tibben A, Duivenvoorden HJ, et al. Predicting adaptation to  
45 presymptomatic DNA testing for late onset disorders: who will experience distress? Rotterdam  
46 Leiden Genetics Workgroup. *J Med Genet*. 1998;**35**:745-54.  
47

48  
49 32. Walsh W, Betz N. *Tests and Assessments*. New Jersey: Prentice Hall Inc; 1985.  
50

51  
52  
53 33. Melnick EL, Everitt BS. *Quantitative risk analysis and assessment*. Hebokea NJ: John  
54 Wiley & Sons; 2008.  
55  
56  
57  
58  
59  
60

- 1  
2  
3  
4  
5  
6  
7  
8  
9  
10  
11  
12  
13  
14  
15  
16  
17  
18  
19  
20  
21  
22  
23  
24  
25  
26  
27  
28  
29  
30  
31  
32  
33  
34  
35  
36  
37  
38  
39  
40  
41  
42  
43  
44  
45  
46  
47  
48  
49  
50  
51  
52  
53  
54  
55  
56  
57  
58  
59  
60
34. Moller HJ. Rating depressed patients: observer- vs self-assessment. *Eur Psychiatry*. 2000;**15**:160-72.
35. Aben I, Verhey F, Lousberg R, et al. Validity of the beck depression inventory, hospital anxiety and depression scale, SCL-90, and hamilton depression rating scale as screening instruments for depression in stroke patients. *Psychosomatics*. 2002;**43**:386-93.
36. Pasquini M, Biondi M, Costantini A, et al. Detection and treatment of depressive and anxiety disorders among cancer patients: feasibility and preliminary findings from a liaison service in an oncology division. *Depress Anxiety*. 2006;**23**:441-8.
37. Beck CT. A checklist to identify women at risk for developing postpartum depression. *J Obstet Gynecol Neonatal Nurs*. 1998;**27**:39-46.
38. Reid AJ, Biringner A, Carroll JD, et al. Using the ALPHA form in practice to assess antenatal psychosocial health. Antenatal Psychosocial Health Assessment. *CMAJ*. 1998;**159**:677-84.
39. Goutham R. What is an ROC curve? *The Journal of Family Practice*. 2003;**52**:695.
40. Esplen MJ, Hunter J. Therapy in the Setting of Genetic Predisposition to Cancer' in 'Handbook of Psychotherapy in Cancer Care. In: Watson M, Kissane D, editors. Handbook of Psychotherapy in Cancer Care. London: John Wiley & Sons Ltd; 2011. p. 201-12.
41. Lyons JS. A Communication Theory of Measurement in Human Service Settings. New York: Springer; 2009.
42. Broadstock M, Michie S, Gray J, et al. The psychological consequences of offering mutation searching in the family for those at risk of hereditary breast and ovarian cancer--a pilot study. *Psychooncology*. 2000;**9**:537-48.

**Title**

Developing A Brief Screening Instrument for Psychosocial Risk Associated with Genetic Testing – A Pan Canadian Cohort Study

**Corresponding Author Address**

Mary Jane Esplen, PhD  
CIHR Scientist and Professor  
Department of Psychiatry, Faculty of Medicine, University of Toronto  
Behavioral Sciences and Health Research Division  
University Health Network  
200 Elizabeth Street, 9-EN-242A  
Toronto ON M5G 2C4 Canada  
Tel: (416) 340-3024  
Fax: (416) 340-4739  
Email: mesplen@uhnres.utoronto.ca

**List of Authors and Institutions**

Mary Jane Esplen PhD<sup>1,2,3</sup>, Mario Cappelli PhD<sup>4</sup>, Jiahui Wong PhD<sup>2,3</sup>, Joan Bottorff PhD<sup>5</sup>, Jon Hunter MD<sup>2,6</sup>, June Carroll MD<sup>6</sup>, Michel Dorval PhD<sup>7</sup>, Brenda Wilson PhD<sup>8</sup>, Judith Allanson MD<sup>9</sup>, Kara Semotiuk MSc<sup>10</sup>, Melyssa Aronson MSc<sup>10</sup>, Louise Bordeleau MD<sup>11</sup>, Nicole Charlemagne MSW<sup>1</sup>, Wendy Meschino MD<sup>12</sup>  
<sup>1</sup>University Health Network, Toronto ON; <sup>2</sup>University of Toronto: Department of Psychiatry, Toronto ON; <sup>3</sup>de Souza Institute, Toronto ON; <sup>4</sup>Children's Hospital of Eastern Ontario, Ottawa ON; <sup>5</sup>University of British Columbia Okanagan, Kelowna BC; <sup>6</sup>Mount Sinai Hospital, Toronto ON; <sup>7</sup>Laval University, Quebec QC; <sup>8</sup>University of Ottawa, Ottawa ON; <sup>9</sup>Eastern Ontario Regional Genetics Centre, Ottawa ON; <sup>10</sup>Zane Cohen Centre for Digestive Diseases, Mount Sinai Hospital, Toronto ON; <sup>11</sup>McMaster University, Hamilton ON; <sup>12</sup>North York General Hospital, Toronto ON.

**Keywords:**

Genetics, Psychosocial, Screening, Psychosocial Problems, Psychosocial Functioning, Psychological Risk Factors

**Word Count:** 5115

**Abstract:**

Objectives: To develop a brief, reliable and valid instrument to screen psychosocial risk among those who are undergoing genetic testing for Adult-Onset Hereditary Disease (AOHD).

Design: A prospective two-phase cohort study.

Setting: 5 genetic testing centres for AOHD such as cancer, Huntingtons, or Hemochromatosis, in ambulatory clinics of tertiary hospitals across Canada.

Participants: 141 individuals undergoing genetic testing were approached and consented to the instrument development phase of the study (Phase I). The Genetic Psychosocial Risk Instrument (GPRI) developed in Phase I was tested in Phase II for item refinement and validation. A separate cohort of 722 individuals consented to the study, 712 completed the baseline package, and 463 completed all follow-up assessments. Most participants were female, at mid-life stage. Individuals in advanced stages of the illness or with cognitive impairment or language barrier were excluded.

Interventions: Phase I: GPRI items were generated from 1) a review of the literature, 2) input from genetic counselors and 3) phase I participants. Phase II: further item refinement and validation was conducted with a second cohort of participants who completed the GPRI at baseline and were followed for psychological distress one month post genetic testing results.

Primary and secondary outcome measures: GPRI, Hamilton Depression Rating Scale (HAM-D), Hamilton Anxiety Rating Scale (HAM-A), Brief Symptom Inventory (BSI), and Impact of Event Scale (IES).

Results: The final 20 item GPRI had a high reliability - Cronbach's Alpha at 0.81. The construct validity was supported by high correlations between GPRI and BSI and IES. The predictive value was demonstrated by a Receiver Operating Characteristic (ROC) curve of 0.78 plotting GPRI against follow-up assessments using HAM-D and HAM-A.

Conclusions: With a cut off score of 50, GPRI identified 84% of participants who displayed distress post genetic testing results, supporting its potential usefulness in a clinical setting.

Word count: 299

Trial registration: Not applicable



## Summary

### 1) Article Focus

- A significant group of individuals undergoing genetic testing for Adult onset disease experience distress or challenges in adaptation, some might develop depression or anxiety
- Existing psychological screening tools do not take into consideration “risk factors” associated with heritable illness or genetic-related stressors
- A screening tool designed for genetic testing services is a useful tool to guide clinicians in relation to which patients would benefit from added psychosocial support during the genetic testing process.

### 2) Key Messages

- A subgroup of patients undergoing genetic testing required added psychosocial support to facilitate adaptation to genetic/ risk information. Busy genetic service providers can face challenges to identify these individuals and provide timely interventions or referrals.
- A new brief instrument was designed and validated to identify those individuals at risk for psychological distress such as depression or anxiety who are undergoing genetic testing for adult onset diseases.
- This is the first study to develop and validate a psychological screening instrument for genetic testing field.

### 3) Strengths and Limitations

- This newly developed tool, Genetic Psychosocial Risk Instrument (GPRI), is the first reported psychosocial screening instrument for use across Adult Onset Hereditary Diseases.
- The GPRI demonstrates promising psychometric properties as a tool designed to assist genetics health care providers determine which of their patients undergoing genetic testing for AOHD is at increased psychological risk and who will benefit from added psychosocial support.
- Study findings are limited by the characteristics of the sample, most participants were female and undergoing testing for BRCA1/2. Future studies could further address the validity of GPRI in male populations and in the rare adult onset hereditary diseases, such as Huntington’s disease.

## INTRODUCTION

Genetic predisposition is an important determinant of chronic disease and disability. Despite the benefits of genetic testing, such as increased screening or prophylactic interventions, individuals at high risk for serious illness may become increasingly fearful or distressed about the future. In fact, a consistent finding is that the majority of individuals do adjust to genetic test results, however a subset of individuals undergoing genetic testing for Adult Onset Hereditary Disease (AOHD) experience psychological distress, such as anxiety or depressive symptoms. A screening tool, designed for the genetic testing context, would be helpful in assisting geneticists, genetic counselors or primary care providers to identify this particular group for the implementation of at appropriate preventive or follow-up interventions. Herein, we present a newly developed psychological risk screening instrument that can be readily used within a genetic service for AOHD.

### **Risk Factors and Psychological Impact of Genetic Testing: The Evidence**

The knowledge of genetic risk is life-long and individuals and families often find themselves confronted with ongoing need to face issues and make decisions. Examples include decision-making around prevention and treatment options (e.g. increased surveillance, prophylactic surgery, chemoprevention), the need to notify family members, and in relation personal decisions, such as those involving childbearing [1, 2]. Studies utilizing standardized measures of distress (e.g. symptoms of anxiety or depression) have demonstrated that 8 to 25% of individuals undergoing genetic testing experience distress, the level of which falls within the clinical ranges for depression and anxiety [2-5]. Studies that have utilized standardized disease specific measures of distress (i.e. instruments measuring breast/ovarian cancer worry) have demonstrated

1  
2  
3 higher prevalence levels [6, 7].  
4

5  
6 The risk factors for psychological symptoms amongst individuals undergoing genetic  
7 testing have been delineated in several studies [4, 8, 9]. While there is generally elevated  
8 distress using global measures for depression or anxiety among those who receive positive test  
9 results [9-11], individuals testing negative or receiving uninformative results may also have  
10 adjustment difficulties [12]. For example, individuals may feel guilt or continue to worry about  
11 their disease risk [2, 7, 12]. These findings highlight the importance of considering risk factors  
12 in addition to the test result itself. Individuals who have elevated psychological symptoms at the  
13 pre-test stage and those with a previous psychiatric history (i.e., depression) are particularly at  
14 risk for an adverse psychological outcome after testing [2, 8, 9].  
15  
16  
17  
18  
19  
20  
21  
22  
23  
24  
25  
26

27 Additional risk factors for distress are more specific to the genetics context and include  
28 the level of penetrance of the gene mutation or degree of certainty of developing the disease [4].  
29 The perception of control over the disease (including the number of prevention/treatment  
30 options) and perception of the immediacy of risk (proximity in age to perceived disease onset)  
31 are important predictors [4, 13]. The expectation of a negative test result can play a role in  
32 adjustment, as can the context of test results of other family members [9, 14]. As in other  
33 medical areas, specific coping styles can affect adjustment [15]. The prior experiences with loss  
34 of family members to disease, as well as the developmental level (i.e. young age) of the  
35 individual at the time of the loss [2, 3, 16] are significant factors affecting potential adjustment.  
36 In addition, the prior experience of giving care to a family member with the disease and lower  
37 levels of social support have been associated with poorer adjustment following a positive test  
38 result [2-4, 8, 16].  
39  
40  
41  
42  
43  
44  
45  
46  
47  
48  
49  
50  
51  
52  
53  
54  
55  
56  
57  
58  
59  
60

1  
2  
3  
4  
5  
6  
7  
8  
9  
10  
11  
12  
13  
14  
15  
16  
17  
18  
19  
20  
21  
22  
23  
24  
25  
26  
27  
28  
29  
30  
31  
32  
33  
34  
35  
36  
37  
38  
39  
40  
41  
42  
43  
44  
45  
46  
47  
48  
49  
50  
51  
52  
53  
54  
55  
56  
57  
58  
59  
60

It is clear that there is not one predominant factor, but rather, a series of variables that may contribute to elevated levels of psychological distress [2, 17]. Emotional reactions may impede the assimilation of risk information and the adoption of preventive measures [2, 18]. Psychological distress occurs along a continuum [19, 20] and can be difficult to identify by health professionals [21]. Distress may not become manifest to the health care team until the patient reaches an observable crisis level, i.e. the onset of severe depression or anxiety, or significant conflicts with the family. An early screening instrument would enable healthcare providers to identify patients being at higher psychological risk in order that appropriate support can be given at the right time. In fact, there is now a general consensus that genetic testing should be accompanied by psychological support to promote optimal adjustment [2, 22].

### **Screening for Psychological Risk Factors- Why is it necessary?**

The gold standard for identifying psychologically distressed individuals involves structured clinical interviews administered by a clinical psychologist or psychiatrist [21]. However, it is too costly and often not feasible in genetic clinics. Standardized measures of psychological functioning (e.g. global scales of depression or anxiety) can also be used as a method for identifying distress. However, few clinics use these measures in practice because of personnel and time requirements for scoring and interpretation of them. Furthermore, these instruments tend to identify global symptoms that are consistent with the diagnostic classifications of anxiety and/or depression and may lack sensitivity to the important and unique issues that surround genetic testing; issues that may include concerns about family members, past experiences with an inheritable disease, and uncertainty about risk reduction options [19, 21]. In addition, items on these measures typically focus on symptoms of anxiety or depression, rather on variables

1  
2  
3 associated with heritable disease or genetic testing or risk, which may pose barriers for use by  
4 genetics health service providers who may prefer instruments that, at face value, appear to them  
5 and their patients as being clinically more relevant to the genetic testing context.  
6  
7  
8  
9

10 More recently, new outcome measures designed to assess the psychological impact of  
11 receiving genetic information have been developed. For example, the Multidimensional Impact  
12 of Cancer Risk Assessment (MICRA) is designed to assess concerns and impacts associated with  
13 genetic testing for BRCA1/2 [19] and another tool, the Psychological Adaptation to Genetic  
14 Information Scale, is now available [23]. While these measures will require further validation  
15 they provide more clinically relevant approaches to capturing specific impacts of genetic  
16 information, such as the increased sense of vulnerability often experienced following genetic  
17 testing [19, 23].  
18  
19  
20  
21  
22  
23  
24  
25  
26  
27  
28

29 Measures of global psychological functioning and the evolving outcome measurement  
30 tools for the genetics field are not designed to “predict” vulnerability for future distress, but  
31 rather, measure current distress levels. Screening, the aim of the tool developed in this study in  
32 contrast, is a rapid, cost-effective alternative [21] to prospectively identify individuals who may  
33 experience significant difficulty in their attempts to adapt to their genetic information [17]. A  
34 screening tool enables providers to offer timely and focused educational and psychosocial  
35 interventions to *prevent* future distress.  
36  
37  
38  
39  
40  
41  
42  
43  
44  
45

46 The primary *objective* of this study was to develop a brief, reliable and valid  
47 psychological risk screening instrument for use in the genetic testing context. The new  
48 instrument aimed to incorporate empirically based risk factors for psychological symptoms and  
49 would need to show a high sensitivity, specificity and predictive validity indicating risk for  
50 future distress post genetic testing results. A cutoff point would need to be determined to guide  
51  
52  
53  
54  
55  
56  
57  
58  
59  
60

1  
2  
3 clinical decisions as to whether or not to refer, further assess, or intervene to reduce an  
4 individual's expressed concern.  
5  
6  
7  
8  
9

## 10 **METHODS AND MATERIALS**

11  
12 The study was carried out from September 2005 to July 2010, with research ethics board  
13 approval from participating genetics clinics: Toronto (Mount Sinai Hospital, North York General  
14 Hospital, Princess Margaret Hospital); Ottawa (Children's Hospital of Eastern Ontario); and  
15 Vancouver (British Columbia Cancer Agency). Individuals beginning the genetic testing process  
16 for AOHD at each site were approached by genetic counsellors on the project team for their  
17 permission to be contacted about the study. Those who expressed interest were mailed the  
18 baseline package that included the informed consent. The informed consent included all  
19 components of the study, including questionnaires, follow-up phone calls, telephone interviews,  
20 as well as to the release of their genetic testing information to the research team.  
21  
22  
23  
24  
25  
26  
27  
28  
29  
30  
31  
32  
33

34 A two phase approach was used for this study: **Phase I: Item Generation and Refinement**,  
35 and **Phase II: Validation**. The multi-stage method [24] takes validation into consideration at  
36 each stage of scale development and has been used successfully in previous studies [25].  
37  
38  
39  
40  
41  
42

### 43 **Phase I: Item Generation and Refinement.**

#### 44 ***Item generation***

45  
46 To generate items for the Genetic Psychosocial Risk Instrument (GPRI), a literature search was  
47 performed for the following AOHDs: Cancer (Hereditary Breast-Ovarian Cancer Syndrome/  
48 Lynch Syndrome), Huntington Disease (HD), and Hemochromatosis. These diseases were  
49 selected as they represented the majority of patients attending genetic clinics and had an  
50  
51  
52  
53  
54  
55  
56  
57  
58  
59  
60

1  
2  
3 associated available psychosocial literature for review. Databases including Cinahl (1982 to  
4 2006), Medline (1966 to 2006), PsychInfo (1985 to 2006), and Pubmed (1985 to 2006) were  
5 searched as well as hand search of references from major publications. Keywords included:  
6 genetic screening, genetic testing, psychological, psychological well-being, psychological  
7 adjustment, stress, adaptation, cancer worry, disease worry, and distress. Selection criteria for the  
8 literature review included studies with a follow-up design or review articles. Each selected study  
9 was reviewed by two reviewers on its quality of evidence and generalizability using a  
10 standardized template. A total of 73 relevant studies were identified among the disease groups:  
11 49 on cancer, 20 on HD, 2 on Hemochromatosis, and 2 described mixed conditions.  
12  
13  
14  
15  
16  
17  
18  
19  
20  
21  
22  
23

24 Risk factors for psychological distress identified by the literature review provided the  
25 basis for item generation. Items were written in a mixed format where respondents were asked  
26 for their endorsement of each statement ranging from Yes/No for risk factors of binary nature, to  
27 a 5-point likert-type scale for risk factors with stages in frequency and/or intensity. The  
28 instrument items were further refined by 10 genetic service providers (3 geneticists, 4 genetic  
29 counselors, 2 oncologists, 1 genetics nurse) rating items on *comprehension, readability, and*  
30 *perceived clinical relevance* using a ten-point scale with 0 being "excellent/definitely relevant"  
31 and 10 being "very poor/definitely not relevant". Risk factor items were removed if rated above  
32 five by more than 3 providers. Providers were also asked to suggest additional risk factor items.  
33  
34  
35  
36  
37  
38  
39  
40  
41  
42  
43  
44  
45  
46  
47  
48  
49  
50  
51  
52  
53  
54  
55  
56  
57  
58  
59  
60  
61  
62  
63  
64  
65  
66  
67  
68  
69  
70  
71  
72  
73  
74  
75  
76  
77  
78  
79  
80  
81  
82  
83  
84  
85  
86  
87  
88  
89  
90  
91  
92  
93  
94  
95  
96  
97  
98  
99  
100  
101  
102  
103  
104  
105  
106  
107  
108  
109  
110  
111  
112  
113  
114  
115  
116  
117  
118  
119  
120  
121  
122  
123  
124  
125  
126  
127  
128  
129  
130  
131  
132  
133  
134  
135  
136  
137  
138  
139  
140  
141  
142  
143  
144  
145  
146  
147  
148  
149  
150  
151  
152  
153  
154  
155  
156  
157  
158  
159  
160  
161  
162  
163  
164  
165  
166  
167  
168  
169  
170  
171  
172  
173  
174  
175  
176  
177  
178  
179  
180  
181  
182  
183  
184  
185  
186  
187  
188  
189  
190  
191  
192  
193  
194  
195  
196  
197  
198  
199  
200  
201  
202  
203  
204  
205  
206  
207  
208  
209  
210  
211  
212  
213  
214  
215  
216  
217  
218  
219  
220  
221  
222  
223  
224  
225  
226  
227  
228  
229  
230  
231  
232  
233  
234  
235  
236  
237  
238  
239  
240  
241  
242  
243  
244  
245  
246  
247  
248  
249  
250  
251  
252  
253  
254  
255  
256  
257  
258  
259  
260  
261  
262  
263  
264  
265  
266  
267  
268  
269  
270  
271  
272  
273  
274  
275  
276  
277  
278  
279  
280  
281  
282  
283  
284  
285  
286  
287  
288  
289  
290  
291  
292  
293  
294  
295  
296  
297  
298  
299  
300  
301  
302  
303  
304  
305  
306  
307  
308  
309  
310  
311  
312  
313  
314  
315  
316  
317  
318  
319  
320  
321  
322  
323  
324  
325  
326  
327  
328  
329  
330  
331  
332  
333  
334  
335  
336  
337  
338  
339  
340  
341  
342  
343  
344  
345  
346  
347  
348  
349  
350  
351  
352  
353  
354  
355  
356  
357  
358  
359  
360  
361  
362  
363  
364  
365  
366  
367  
368  
369  
370  
371  
372  
373  
374  
375  
376  
377  
378  
379  
380  
381  
382  
383  
384  
385  
386  
387  
388  
389  
390  
391  
392  
393  
394  
395  
396  
397  
398  
399  
400  
401  
402  
403  
404  
405  
406  
407  
408  
409  
410  
411  
412  
413  
414  
415  
416  
417  
418  
419  
420  
421  
422  
423  
424  
425  
426  
427  
428  
429  
430  
431  
432  
433  
434  
435  
436  
437  
438  
439  
440  
441  
442  
443  
444  
445  
446  
447  
448  
449  
450  
451  
452  
453  
454  
455  
456  
457  
458  
459  
460  
461  
462  
463  
464  
465  
466  
467  
468  
469  
470  
471  
472  
473  
474  
475  
476  
477  
478  
479  
480  
481  
482  
483  
484  
485  
486  
487  
488  
489  
490  
491  
492  
493  
494  
495  
496  
497  
498  
499  
500  
501  
502  
503  
504  
505  
506  
507  
508  
509  
510  
511  
512  
513  
514  
515  
516  
517  
518  
519  
520  
521  
522  
523  
524  
525  
526  
527  
528  
529  
530  
531  
532  
533  
534  
535  
536  
537  
538  
539  
540  
541  
542  
543  
544  
545  
546  
547  
548  
549  
550  
551  
552  
553  
554  
555  
556  
557  
558  
559  
560  
561  
562  
563  
564  
565  
566  
567  
568  
569  
570  
571  
572  
573  
574  
575  
576  
577  
578  
579  
580  
581  
582  
583  
584  
585  
586  
587  
588  
589  
590  
591  
592  
593  
594  
595  
596  
597  
598  
599  
600  
601  
602  
603  
604  
605  
606  
607  
608  
609  
610  
611  
612  
613  
614  
615  
616  
617  
618  
619  
620  
621  
622  
623  
624  
625  
626  
627  
628  
629  
630  
631  
632  
633  
634  
635  
636  
637  
638  
639  
640  
641  
642  
643  
644  
645  
646  
647  
648  
649  
650  
651  
652  
653  
654  
655  
656  
657  
658  
659  
660  
661  
662  
663  
664  
665  
666  
667  
668  
669  
670  
671  
672  
673  
674  
675  
676  
677  
678  
679  
680  
681  
682  
683  
684  
685  
686  
687  
688  
689  
690  
691  
692  
693  
694  
695  
696  
697  
698  
699  
700  
701  
702  
703  
704  
705  
706  
707  
708  
709  
710  
711  
712  
713  
714  
715  
716  
717  
718  
719  
720  
721  
722  
723  
724  
725  
726  
727  
728  
729  
730  
731  
732  
733  
734  
735  
736  
737  
738  
739  
740  
741  
742  
743  
744  
745  
746  
747  
748  
749  
750  
751  
752  
753  
754  
755  
756  
757  
758  
759  
760  
761  
762  
763  
764  
765  
766  
767  
768  
769  
770  
771  
772  
773  
774  
775  
776  
777  
778  
779  
780  
781  
782  
783  
784  
785  
786  
787  
788  
789  
790  
791  
792  
793  
794  
795  
796  
797  
798  
799  
800  
801  
802  
803  
804  
805  
806  
807  
808  
809  
810  
811  
812  
813  
814  
815  
816  
817  
818  
819  
820  
821  
822  
823  
824  
825  
826  
827  
828  
829  
830  
831  
832  
833  
834  
835  
836  
837  
838  
839  
840  
841  
842  
843  
844  
845  
846  
847  
848  
849  
850  
851  
852  
853  
854  
855  
856  
857  
858  
859  
860  
861  
862  
863  
864  
865  
866  
867  
868  
869  
870  
871  
872  
873  
874  
875  
876  
877  
878  
879  
880  
881  
882  
883  
884  
885  
886  
887  
888  
889  
890  
891  
892  
893  
894  
895  
896  
897  
898  
899  
900  
901  
902  
903  
904  
905  
906  
907  
908  
909  
910  
911  
912  
913  
914  
915  
916  
917  
918  
919  
920  
921  
922  
923  
924  
925  
926  
927  
928  
929  
930  
931  
932  
933  
934  
935  
936  
937  
938  
939  
940  
941  
942  
943  
944  
945  
946  
947  
948  
949  
950  
951  
952  
953  
954  
955  
956  
957  
958  
959  
960  
961  
962  
963  
964  
965  
966  
967  
968  
969  
970  
971  
972  
973  
974  
975  
976  
977  
978  
979  
980  
981  
982  
983  
984  
985  
986  
987  
988  
989  
990  
991  
992  
993  
994  
995  
996  
997  
998  
999  
1000

1  
2  
3 family communication (6 items); disease specific concerns (5 items); optimism (3 items); social  
4 support (3 items), pre-morbid functioning and previous psychiatric history (10 items).  
5  
6  
7  
8  
9

### 10 ***Item refinement:***

11  
12 Subjects: Following informed consent, a convenient sample of 141 participants who had given  
13 blood for genetic tests at the Toronto and Ottawa sites completed the GPRI (using a three  
14 patients per item ratio) to select the best items for the candidate scale. The participants were  
15 middle aged ( $48.67 \pm 13.29$ ), mostly female (77%) testing for hereditary breast cancer, and many  
16 (65%) had already suffered the onset of the illness.  
17  
18  
19  
20  
21  
22  
23

24 Scoring: To ensure that binary items carry an equal weight as the 5-point likert-type  
25 items, a score of 5 was assigned to *Yes* and 1 to *No*. A score of 3 or mean-substitute was assigned  
26 to *Not Applicable* to allow it to be counted in the total score. Reliability analysis was carried out  
27 and a Cronbach's Alpha was set for .75 or higher for the scale to move to the next phase [26].  
28  
29  
30  
31  
32  
33  
34  
35  
36  
37  
38  
39  
40  
41  
42  
43  
44  
45  
46  
47  
48  
49  
50  
51  
52  
53  
54  
55  
56  
57  
58  
59  
60

### 44 **Phase II: Scale Validation**

46 Subjects: Individuals undergoing genetic testing for one of the AOHDs in each of the five study  
47 sites were invited to participate: 1) age 18 or above undergoing genetic testing for cancer, HD, or  
48 Hemochromatosis; 2) fluent in English; and 3) residing within 1.5 hours driving distance from  
49 study site. Although the onset of an AOHD was not an exclusion criterion, individuals in  
50 advanced stages of the illness and / or who were unable to consent due to cognitive impairment  
51  
52  
53  
54  
55  
56  
57  
58  
59  
60



1  
2  
3 were excluded. At baseline, participants were asked to complete a set of self-report  
4  
5 questionnaires (e.g. Brief Symptom Inventory, etc.) described below within a one month period  
6  
7 following the provision of a blood sample. For those who received a genetic test result,  
8  
9 questionnaires were mailed within two weeks to one month of the disclosure of test result. These  
10  
11 participants were also telephoned to complete the Hamilton Depression and Hamilton telephone-  
12  
13 based Anxiety Scales to further assess depressive and anxiety symptoms. .  
14  
15

16  
17 Materials: At baseline, three psychosocial measures were used: GPRI Candidate Scale  
18  
19 from Phase I. To facilitate scoring of the scale by genetic providers, scores for response to each  
20  
21 item on the GPRI were imbedded in the questionnaire, where clinicians could calculate a total  
22  
23 score in less than 5 minutes. Brief Symptom Inventory (BSI) The BSI is a 53-item measure of  
24  
25 psychological distress that contains three global scales i) depression, ii) anxiety and iii)  
26  
27 somatization [27]. It is widely used in medical and psychiatric populations to assess  
28  
29 psychological functioning; Impact of Event Scale (IES): The IES is a 15-item, likert-style scale  
30  
31 used to assess the experience of a specific stress response and is designed to be easily anchored  
32  
33 in relation to a specific stressor or life event. As previously utilized in the genetics literature to  
34  
35 assess genetic testing-related distress, the IES items were anchored in relation to the event of  
36  
37 “the genetic test result”. The IES has two sub-scales: i) intrusive thoughts and feelings associated  
38  
39 with the stressful life event, and ii) items associated with patterns of avoidance of certain  
40  
41 thoughts, feelings, or situations [28].  
42  
43  
44  
45  
46  
47

48  
49 Measures at one month post genetic testing results included: the self -reports scales of the  
50  
51 BSI, IES and each participant received a telephone call for the telephone-based Hamilton  
52  
53 Depression 29-item Rating Scale (HAM-D) and Hamilton Anxiety Rating Scale (HAM-A). The  
54  
55 HAM-D evaluates depressed mood, vegetative and cognitive symptoms of depression, and  
56  
57  
58  
59  
60

1  
2  
3 comorbid anxiety symptoms [29]. The HAM-A quantifies the severity of anxiety  
4  
5  
6  
7  
8  
9  
10  
11  
12  
13  
14  
15  
16  
17  
18  
19  
20  
21  
22  
23  
24  
25  
26  
27  
28  
29  
30  
31  
32  
33  
34  
35  
36  
37  
38  
39  
40  
41  
42  
43  
44  
45  
46  
47  
48  
49  
50  
51  
52  
53  
54  
55  
56  
57  
58  
59  
60

comorbid anxiety symptoms [29]. The HAM-A quantifies the severity of anxiety  
symptomatology and consists of 14 items. The HAM-D and HAM-A have demonstrated validity  
in clinical interview, in person or by telephone [30]. These two instruments were selected as  
main outcome measures based on the literature that the standardized interview based-rating  
scales should be used over subjective report scales as the principal outcome criterion in  
psychological distress both in general practice and in research trials [34]. Cases would be defined  
by established cut-offs from the literature for HAM-D  $\geq 12$  [35] or HAM-A  $\geq 10$  [36]. These  
cut off points were established for populations in general practice, which was our study  
population.

The one-month follow-up time point was selected as it is when elevated distress might  
occur [31]. In addition, the 2-week duration criterion for depression defined by the Diagnostic  
and Statistical Manual of Mental Disorders, Fourth Edition (DSM-IV) is met by this time frame.

### Assessing Psychometric Property of the Scale

As a first step, items were required to have at least an 80% response rate. Second, each item was  
examined to determine its contribution to the internal consistency of the total 37-item scale. The  
minimum item-total correlation was set at .20 [32].

A principal components factor analysis with varimax rotation was performed on the  
candidate scale to examine the factor structure and the loading of the items. To assess the  
*convergent validity* of the candidate scale, the correlations between baseline GPRI, IES and BSI  
were calculated. To assess the *sensitivity, specificity and predictive value* of the GPRI, the  
follow-up HAM-D and HAM-A were used to identify “cases” who met cut offs for either the  
depression or anxiety symptomatology. For example, participants with a high GPRI at baseline

1  
2  
3 would be classified as “at risk” for future onset of adjustment difficulties. This would be  
4 confirmed by a high HAM-D or HAM-A score or “case” during 1 month follow-up. Similarly,  
5 those with a low GPRI score should receive low score in HAM-D or HAM-A as “non-cases”.  
6  
7 The predictive value of the GRPI, describing the number of test-positives (in our case, high  
8 GPRI) who truly have the psychological condition (i.e. cases identified by HAM-D or HAM-A),  
9 was tested by a Receiver Operating Characteristic (ROC) curve which visually plotted the true  
10 positive rate (sensitivity) over false positive rate (1-specificity). We included cases to be  
11 identified by either anxiety and/or depressive symptomatology as both have been reported in the  
12 literature [8, 9].  
13  
14  
15  
16  
17  
18  
19  
20  
21  
22  
23  
24

25 To address the issue of missing follow-up data in a cohort study, as suggested in the  
26 literature [33], we tested the assumption that the sub sample with missing data had a similar  
27 baseline exposure (similar GPRI) as the non-missing subsample by comparing baseline GPRI  
28 between the participants and dropouts. This step assesses if there was systematic bias resulting  
29 from the loss of information in the follow-up period.  
30  
31  
32  
33  
34  
35  
36  
37  
38

## 39 RESULTS

### 40 Participant characteristics

41 Study packages were mailed to 1129 individuals interested in hearing more about the study. Of  
42 these individuals, 722 of them consented and 712 (98%) completed the GPRI. Most participants  
43 were tested for the inheritable cancers, while a small percentage of participants were tested for  
44 hemochromatosis and HD. Similar to phase I, phase II participants were mostly female, at mid-  
45 life stage, and more than half had a past diagnosis of the disease (see table 1).  
46  
47  
48  
49  
50  
51  
52  
53  
54

55 **Insert Table 1 about Here**  
56  
57  
58  
59  
60

1  
2  
3 Of the 712 participants, 85 (12%) did not receive genetic testing results at the scheduled  
4 follow-up time and were not eligible for follow-up measures on psychological symptoms in  
5 response to a genetic testing result. Of the remaining 627 participants, 152 (24%) did not return  
6 the self-administered follow-up questionnaires and 12 (2%) submitted the follow-up  
7 questionnaire package but did not complete a standardized telephone interview using HAM-D  
8 and HAM-A (up to 4 telephone calls were made to reach each participant). Therefore the final  
9 number of participants with complete follow-up data is 463 (74%). The age, and baseline GPRI  
10 score between individuals who did not receive genetic testing results (age 51.4±12.7, GPRI  
11 49.3±12.7), those who did not return the follow-up questionnaires (age 48.1±11.6, GPRI  
12 50.2±14.4) and those who completed follow-up measures (age 50.1±12.8, GPRI 49.1±13.5) were  
13 compared. There was no statistically significant group difference (ANOVA and all post-hoc  
14 comparisons  $p>0.05$ ).

15  
16 Because of the similarity between the dropouts and completers, we proceeded with  
17 reliability and validity analysis of the tool using the subsample that provided outcome data.

18 We carried out the calculations for distress level, for example, for depression and anxiety  
19 symptoms using the BSI data, for specific distress associated a genetic test result using the IES.  
20 Approximately, 13.0% to 20.1% of participants reached the threshold of moderate to severe  
21 distress respectively (see table 2).

#### 22 **Insert Table 2 about Here**

23 HAM-D and HAM-A interview data from 463 participants were used as a further  
24 validation tool to measure psychological symptoms post genetic testing results. Defined by cut-  
25 offs for HAM-D  $\geq 12$  [35] or HAM-A  $\geq 10$  in the literature [36], the rates for psychological  
26  
27  
28  
29  
30  
31  
32  
33  
34  
35  
36  
37  
38  
39  
40  
41  
42  
43  
44  
45  
46  
47  
48  
49  
50  
51  
52  
53  
54  
55  
56  
57  
58  
59  
60

1  
2  
3  
4  
5  
6  
7  
8  
9  
10  
11  
12  
13  
14  
15  
16  
17  
18  
19  
20  
21  
22  
23  
24  
25  
26  
27  
28  
29  
30  
31  
32  
33  
34  
35  
36  
37  
38  
39  
40  
41  
42  
43  
44  
45  
46  
47  
48  
49  
50  
51  
52  
53  
54  
55  
56  
57  
58  
59  
60

distress of either depression or anxiety was 13.7% (N=63). The rate was 13% for HD, 15% for breast cancer and 7% for Lynch Syndrome.

### Reliability and Factor Analysis

A reliability analysis was performed on 37 items. Twenty items belonging to 18 questions were selected based on the criteria for item selection described in the methods section. The Cronbach's alpha of the 20 item GPRI was 0.81 suggesting a good level of internal consistency.

The factor analysis resulted in a psychometrically sound 3-factor solution, with subscales representing the dimensions of: 1) *Perceived impact and personal adjustment to genetic testing* (12 items); 2) *Past history of mental health concerns* (5 items) and 3) *Personal history/family history/loss to cancer* (3 items). All three factors met the minimum Eigenvalue criteria of 1.

The first, 12-item factor (ALPHA = 0.85), accounting for 22% of the variance, includes items associated with the anticipated or experienced impact of being at high risk for AOHD. Example items included: "My worries about the disease affect my daily mood"; "The disease for which I am at risk is currently causing a significant disruption in my family life".

The second 5-item factor (ALPHA = 0.76), accounted for an additional 14% of the total variance, and reflected a sense of a person's past history or vulnerability in the area of mental health, e.g. "I have had emotional problems in the past". These items have been used in other medical health areas [37, 38] and tend to be predictive of maladjustment [20] following a life event.

The third 3 item factor (ALPHA = 0.08), accounted for 8% of the total variance and pertained to personal or family-related experiences associated with the hereditary disorder for which the participant is undergoing testing. Examples include: "I have a personal diagnosis of

1  
2  
3 the disease for which I am receiving counseling”; “I lost a close family member to the disease for  
4 which I am receiving counseling”; and “I have taken care of a very ill parent or another close  
5 family member”. These 3 final items had low item total correlation because they were different  
6 from the rest of the items in that they focused on direct experiences related to the illness, rather  
7 than psychosocial-related items. These items were kept in the scale as they contributed  
8 significantly to the overall variance, and correlated highly with HAM-D and HAM-A. To  
9 determine the relationships between the three factors/subscales, correlations were computed.  
10 Factor1 and factor2 had moderate correlations with each other (factor1/factor2  $r=0.30$ ,  $p<0.01$ ).  
11 The correlation of the first two factors with factor3 was much lower as expected (factor1/factor3  
12  $r=0.06$ , and factor2/factor3  $r=0.01$ , not statistically significant). These results support the  
13 multidimensional character of the GPRI scale (see Table 3).  
14  
15  
16  
17  
18  
19  
20  
21  
22  
23  
24  
25  
26  
27  
28

29  
30 **Insert Table 3 about Here**

31  
32 One additional statement “I am interested in talking to a counselor about one or more of  
33 these concerns” was added to the tool at the end as suggested by participants and providers to  
34 remind them the option of seeing a counselor if required. This statement is not part of the items  
35 examined during the instrument development and therefore does not carry a score.  
36  
37  
38  
39

40  
41 The total score for the 20 item GPRI ranged from 20 to 100, with a sample mean  
42  $49.36\pm 13.23$ . The total was calculated by the sum of the raw scores for each of the statements.  
43 Females had a significantly higher score for the GPRI than males ( $50.37\pm 13.14$  vs.  $41.91\pm 11.47$ ,  
44  $p<0.01$ ), and participants testing for HD had a higher, but non-significant score than participants  
45 testing for cancer ( $52.24\pm 13.24$  vs.  $49.37\pm 13.22$ , n.s.).  
46  
47  
48  
49  
50  
51  
52  
53  
54  
55  
56  
57  
58  
59  
60

## Validity

Construct validity – correlations: The GPRI was assessed for its correlation with other standardized self-report measures of psychological functioning collected at baseline. Convergent validity was demonstrated by the correlation between the GPRI and the following measures: a positive correlation with the IES total score at  $r = .51, p < .001$ , and with BSI at  $r = .58, p < .001$ .

Sensitivity, specificity and the predictive value of GPRI for future distress: The telephone interview-based HAM-D and HAM-A were used to identify subjects who presented specific psychological symptoms of distress such as depression and/or anxiety during the one month post genetic testing follow-up. A total of 63 “cases” (13.6% of 463 completers) were identified as having psychological distress levels above specified thresholds defined in the methods section for either anxiety or depression symptoms or both. About 23% among participants testing positive met the distress threshold, as did 10% among those with negative results, and 20% among uninformative. Participants scoring above HAM-D (N=55) threshold had significantly higher GPRI scores than participants below the threshold (N=408) ( $61.12 \pm 13.27$  vs.  $47.91 \pm 12.27, p < 0.01$ ). Same patterns were observed for HAM-A high (N=40) vs. low (N=423) ( $62.53 \pm 12.92$  vs.  $48.25 \pm 12.43, p < 0.01$ ).

Other demographic characteristics of these 63 subjects include: most were female and undergoing testing for BRCA1/2, which was similar to the whole sample of 712 (table 1). Compared with the whole sample, these subjects had a slightly higher percentage of personal history of cancer (65% vs. 62%), higher rate of recent significant event of loss (56% vs. 47%), greater percentage reporting disease worries affecting mood (54.8% vs. 27%), having a feeling of sadness in the past month (46% vs. 17%) and anxiousness in the past month (33% vs. 17%). Our instrument captured all of these characteristics of this subsample.

1  
2  
3  
4  
5  
6  
7  
8  
9  
10  
11  
12  
13  
14  
15  
16  
17  
18  
19  
20  
21  
22  
23  
24  
25  
26  
27  
28  
29  
30  
31  
32  
33  
34  
35  
36  
37  
38  
39  
40  
41  
42  
43  
44  
45  
46  
47  
48  
49  
50  
51  
52  
53  
54  
55  
56  
57  
58  
59  
60

The predictive value of a test describes how many of the test-positives (in this case, a high score on GPRI) truly have the psychological condition. An ROC curve was used to plot the true positive rate (sensitivity) over the false positive rate (1-specificity). A good ROC curve rises sharply, indicating a high proportion in true positive and a low proportion of false positives. The ROC curve for the GPRI was 0.78, which is considered as an indicator of an adequate screening instrument [39].

An important purpose of the GRPI in our study was to identify individuals at risk for post genetic testing psychological distress. Therefore, the cutoff value was set to maximize sensitivity – in another word, not to miss detecting a “case”. Using a GPRI cut off score of 50, the instrument was able to predict 84% of the “cases” identified by HAM-D or HAM-A conducted post genetic testing results, with a specificity value of 60% (Figure 1).

**Insert Figure 1 about Here**

## DISCUSSION

The aim of this study was to develop a brief, easy-to-use psychosocial screening instrument specific for the genetic testing context and to examine its reliability and validity (Appendix A). To our knowledge this is the first report of a psychosocial screening instrument for use across AOHD. Unlike current psychological instruments used mainly in research studies in genetics clinics to identify existing global symptoms of depression and anxiety, or impacts, the GPRI assesses *psychological risk factors*, such as the specific anticipated impacts of a genetic testing result and the perception of the disease. The GPRI demonstrates promising psychometric properties as a tool designed to assist genetics health care providers determine which of their



1  
2  
3 patients undergoing genetic testing for AOHD is at increased psychological risk and should  
4  
5 likely be considered for additional psychosocial support to facilitate adjustment to a test result.  
6  
7

8 A high reliability was demonstrated by a Cronbach's Alpha at 0.81, moderate to high  
9  
10 item-total correlation and inter-item correlation of the whole scale. The construct validity of the  
11  
12 scale was supported by high correlations between the GPRI and standardized psychological  
13  
14 measures (BSI, IES). The clinical utility and predictive value of the GPRI was supported as  
15  
16 well. A GPRI score above the cutoff of 50 at baseline was able to predict 84% of “distress” cases  
17  
18 identified by HAM-D or HAM-A, a strong indicator of its potential usefulness in a clinical  
19  
20 setting.  
21  
22  
23

24 A brief self-administered screening tool will be easy and likely highly acceptable for  
25  
26 incorporation into genetics clinics. The GPRI can be completed and scored quickly during  
27  
28 clinical visits and without additional burden to patients and health providers. In addition, by  
29  
30 focusing specifically on known risk factors associated with inheritable illness, the instrument  
31  
32 will be perceived as being more clinically relevant and acceptable to patients. Patients with  
33  
34 higher GPRI scores can be flagged and either receive telephone follow-up to further assess  
35  
36 concerns or potential distress or be invited back for an appointment for further assessment and  
37  
38 required psychological treatment.  
39  
40  
41  
42

43 Alternatively, genetic clinics with available psychosocial personnel could utilize the tool  
44  
45 to guide referrals for a formal psychosocial assessment that can further explore and address  
46  
47 specific self-reported psychological factors. For example, in the case where an individual is  
48  
49 particularly fearful of developing an illness or is concerned about specific impacts, such as  
50  
51 expecting relationship or family communications difficulties, **information on communication**  
52  
53 **strategies, personal coaching or family-based interventions could be employed to support the**  
54  
55  
56  
57  
58  
59  
60

1  
2  
3 individual. For an individuals who reports a past history of psychological illness, a mental health  
4 professional could further assess current psychological functioning and implement specific  
5 approaches, and could offer cognitive-behavioral strategies or psychotropic medication to assist  
6 in the management of anxiety or depressive symptoms [40]. Several items incorporate variables  
7 related to heritable disease experiences and associated perceptions which can be used to guide  
8 educational interventions to correct any myths or beliefs.  
9

10  
11  
12  
13  
14  
15  
16  
17  
18 The scale appeared highly acceptable to patients. A high face validity will contribute to  
19 better scale uptake being perceived as “user friendly” and clinically relevant, compared for  
20 example, to a standardized psychological instrument on depression, which have demonstrated  
21 some barriers to clinic uptake [19]. The GPRI in contrast might be considered as a  
22 “communimetric measure”, that is, the items themselves are useful for the clinician in  
23 communicating concerns about specific areas of functioning directly with the patient [41].  
24  
25  
26  
27  
28  
29  
30

31  
32 Left untreated, significant levels of psychological symptoms may lead to lower quality  
33 of life [40], and lower satisfaction with genetics services [21]. A psychological screening  
34 approach allows both for careful monitoring during a known stressful period-that of awaiting test  
35 results [42], and provides an opportunity for any planned follow-up care. Flagging those  
36 individuals who might benefit most from psychosocial care also best utilizes the often limited  
37 psychological resources in genetic clinics [2, 20, 21].  
38  
39  
40  
41  
42  
43  
44  
45

46  
47 Our study findings are limited by the characteristics of the sample, in that most  
48 participants were female and undergoing testing for *BRCA1/2*. This pattern is similar to that  
49 observed in the literature on genetic testing for AOHD, which is predominantly focused on  
50 Hereditary Breast-Ovarian Cancer Syndrome. We attempted to obtain a larger sample of  
51 individuals undergoing genetic testing for HD or Lynch Syndrome which would presumably  
52  
53  
54  
55  
56  
57  
58  
59  
60

1  
2  
3 provide a greater sample of males. However, these sample pools were much smaller. However,  
4  
5 this study and the resulting GPRI represent an attempt to begin the development of a general tool  
6  
7 that addresses concerns that are relevant across genetic samples. Our belief stemming from  
8  
9 clinical practice and the associated literature suggest that the identified mental health issues or  
10  
11 adjustment risk factors are not disease specific. We suggest that future studies further address the  
12  
13 validity of GPRI in male populations and in the rare adult onset hereditary diseases, such as HD.  
14  
15 Future studies should also include randomized controlled trials to assess the effectiveness of the  
16  
17 GPRI in predicting distress, its impact on referral patterns, patient and provider satisfaction, as  
18  
19 well as on cost-effectiveness. The GPRI could also be evaluated in primary care settings where  
20  
21 genetics services might be offered more frequently to meet the demand.  
22  
23  
24  
25  
26  
27  
28

## 29 CONCLUSIONS

30  
31 This is the first study to develop a screening tool specifically to help identify individuals  
32  
33 undergoing genetic testing for AOHD who are at increased psychological risk. The study  
34  
35 resulted in an easy to use, 20-item scale consisting of 3 factors with promising psychometric  
36  
37 properties. The GPRI has the potential to be used as a clinical screening tool and as a validated  
38  
39 measure for future studies. Future work can examine its impact on clinical referral patterns  
40  
41 within the field of genetics, and on its acceptability, reliability and validity with larger samples  
42  
43 of individuals undergoing genetic testing for HD, Lynch Syndrome, and potentially for emerging  
44  
45 new genetic tests, such as for cardiac or psychiatric disorders.  
46  
47  
48  
49  
50  
51  
52  
53  
54  
55  
56  
57  
58  
59  
60

## Acknowledgement

The first author is a recipient of a career scientist award from the Canadian Institutes of Health Research (CIHR) and the Ontario Women's Health Council. This study was funded by Canadian Institutes of Health Research (CIHR) Grant No. AHC 73144. We would like to express our gratitude to all the genetic testing patients who participated in our study. Thank you for your contribution towards this very important work and the development of the instrument. Thank you also to the genetic counselors and clinic staff from the participating genetic centers who assisted in recruitment: Children's Hospital of Eastern Ontario (Eastern Ontario Regional Genetics Centre); North York General Hospital (Clinical Genetics); Mount Sinai Hospital (Familial GI Cancer Registry & Familial Breast Cancer Clinic); Princess Margaret Hospital (Familial Breast & Ovarian Cancer Clinic); and BC Cancer Agency (Hereditary Cancer Program). We would also like to thank the research staff for their commitment and hard work to complete this national multi-site study. Finally, the team would like to pay special recognition to the late Dr. Anne Summers, who was co-investigator on the team. Her dedication to the need for empirically based tools and her strong vision to support recipients of new genetic technology were key influences in the conceptualization, funding and completion of this study.

**Ethics:** Research Ethics Board approval was obtained at all five participating sites: Toronto (Mount Sinai Hospital, North York General Hospital, Princess Margaret Hospital); Ottawa (Children's Hospital of Eastern Ontario); and Vancouver (British Columbia Cancer Agency).

**Data Sharing Statement:** There is no additional data available

**Conflict of Interest:** The authors do not have any conflict of interest to disclose.

**Funding:** This study was funded by Canadian Institutes of Health Research (CIHR) Grant No. AHC 73144.

## Contributorship Statements

### Dr. Mary Jane Esplen

Principal Applicant responsible for leading all aspects of the research, oversees budget, hiring staff, supervising data collection, analysis and interpretation, and writing of all manuscripts and reports.

### Dr. Mario Cappelli

Co-principal inv. responsible for assisting in item generation and refinement, the implementation of data collection, interpretation of findings and writing of manuscripts and reports.

### Dr. Jiahui Wong

Co- Applicant responsible assisting in instrument development, statistical procedures, sampling and interpretation of findings and writing of manuscripts and reports.

### Dr. Joan Bottorff

Co-Applicant responsible for refining of items, guiding the recruitment of providers and testing of the instrument in genetic services, development of guidelines and writing of manuscripts and reports.

### Dr. Jon Hunter

Co-Applicant responsible for assisting in item generation and refinement, guideline development, interpretation of findings and writing of manuscripts and reports.

### Dr. June Carroll

Co-Applicant responsible for assisting in item generation and refinement, implementation of the screening validation strategy and development of guidelines, interpretation of findings and writing of manuscripts and reports.

### Dr. Michel Dorval

Co-Applicant responsible for refining of items, guiding the recruitment of providers and testing of the instrument in genetic services, interpretation of findings and writing of manuscripts and reports.

**Dr. Brenda Wilson**

Co-Applicant responsible for co-leading the implementation of the consensus guidelines components of the proposed study. Will assist in item generation for tool, interpretation of findings, writing of manuscripts and reports.

**Dr. Judith Allanson**

Co-Applicant responsible for refining of items, guiding the recruitment of providers/patients and testing of the instrument in genetic services, development of guidelines and writing of manuscripts and reports.

**Ms. Kara Semotiuk**

Co-Applicant responsible for refining of items, guiding the recruitment of providers and testing of the instrument in genetic services and development of guidelines, and writing of manuscripts and reports.

**Ms. Melyssa Aronson**

Co-Applicant responsible for refining of items, guiding the recruitment of providers and testing of the instrument in genetic services, development of guidelines and writing of manuscripts and reports.

**Dr. Louise Bordeleau**

Co-Applicant responsible for overseeing recruitment at MSH and UHN site in Toronto, testing of instrument and interpretation of findings, writing of manuscripts and reports.

**Ms. Nicole Charlemagne**

Project coordinator, responsible for: patient recruitment and follow-up; assisting in item generation, refinement, and overall layout and design of tool; data collection, data entry, and data clean-up; revisions and submission of manuscript.

**Dr. Wendy Meschino**

Co-Applicant responsible for refining of items, guiding the recruitment of providers and testing of the instrument in genetic services, interpretation of findings and writing of manuscripts and reports.

## REFERENCES

1. Lerman C, Croyle RT. Emotional and behavioral responses to genetic testing for susceptibility to cancer. *Oncology (Williston Park)*. 1996;**10**:191-5, 9; discussion 200-2.
2. Bleiker EM, Hahn DE, Aaronson NK. Psychosocial issues in cancer genetics--current status and future directions. *Acta Oncol*. 2003;**42**:276-86.
3. Wellisch DK, Lindberg NM. A psychological profile of depressed and nondepressed women at high risk for breast cancer. *Psychosomatics*. 2001;**42**:330-6.
4. Broadstock M, Michie S, Marteau T. Psychological consequences of predictive genetic testing: a systematic review. *Eur J Hum Genet*. 2000;**8**:731-8.
5. Ho SM, Ho JW, Bonanno GA, et al. Hopefulness predicts resilience after hereditary colorectal cancer genetic testing: a prospective outcome trajectories study. *BMC Cancer*. 2010;**10**:279.
6. Trask PC, Paterson AG, Wang C, et al. Cancer-specific worry interference in women attending a breast and ovarian cancer risk evaluation program: impact on emotional distress and health functioning. *Psychooncology*. 2001;**10**:349-60.
7. Coyne JC, Kruus L, Racioppo M, et al. What do ratings of cancer-specific distress mean among women at high risk of breast and ovarian cancer? *Am J Med Genet A*. 2003;**116A**:222-8.
8. Marteau TM, Croyle RT. The new genetics. Psychological responses to genetic testing. *BMJ*. 1998;**316**:693-6.
9. Meiser B. Psychological impact of genetic testing for cancer susceptibility: an update of the literature. *Psychooncology*. 2005;**14**:1060-74.
10. Hamilton JG, Lobel M, Moyer A. Emotional distress following genetic testing for hereditary breast and ovarian cancer: a meta-analytic review. *Health Psychol*. 2009;**28**:510-8.
11. Shaw C, Abrams K, Marteau TM. Psychological impact of predicting individuals' risks of illness: a systematic review. *Soc Sci Med*. 1999;**49**:1571-98.

- 1  
2  
3  
4  
5  
6  
7  
8  
9  
10  
11  
12  
13  
14  
15  
16  
17  
18  
19  
20  
21  
22  
23  
24  
25  
26  
27  
28  
29  
30  
31  
32  
33  
34  
35  
36  
37  
38  
39  
40  
41  
42  
43  
44  
45  
46  
47  
48  
49  
50  
51  
52  
53  
54  
55  
56  
57  
58  
59  
60
12. Dorval M, Gauthier G, Maunsell E, et al. No evidence of false reassurance among women with an inconclusive BRCA1/2 genetic test result. *Cancer Epidemiol Biomarkers Prev.* 2005;**14**:2862-7.
  13. Cameron LD, Sherman KA, Marteau TM, et al. Impact of genetic risk information and type of disease on perceived risk, anticipated affect, and expected consequences of genetic tests. *Health Psychol.* 2009;**28**:307-16.
  14. Smith KR, West JA, Croyle RT, et al. Familial context of genetic testing for cancer susceptibility: moderating effect of siblings' test results on psychological distress one to two weeks after BRCA1 mutation testing. *Cancer Epidemiol Biomarkers Prev.* 1999;**8**:385-92.
  15. Dougall AL, Smith AW, Somers TJ, et al. Coping with genetic testing for breast cancer susceptibility. *Psychosom Med.* 2009;**71**:98-105.
  16. Esplen MJ, Urquhart C, Butler K, et al. The experience of loss and anticipation of distress in colorectal cancer patients undergoing genetic testing. *J Psychosom Res.* 2003;**55**:427-35.
  17. Zabora JR. Screening procedures for psychological distress. In: Holland JC, editor. *Psycho-Oncology*. New York: Oxford University Press; 1998. p. 653-62.
  18. Watson M, Lloyd S, Davidson J, et al. The impact of genetic counselling on risk perception and mental health in women with a family history of breast cancer. *Br J Cancer.* 1999;**79**:868-74.
  19. Cella D, Hughes C, Peterman A, et al. A brief assessment of concerns associated with genetic testing for cancer: the Multidimensional Impact of Cancer Risk Assessment (MICRA) questionnaire. *Health Psychol.* 2002;**21**:564-72.
  20. Zabora J, BrintzenhofeSzoc K, Curbow B, et al. The prevalence of psychological distress by cancer site. *Psychooncology.* 2001;**10**:19-28.
  21. Thewes B, Meiser B, Tucker K, et al. Screening for psychological distress and vulnerability factors in women at increased risk for breast cancer: A review of the literature. *Psychology, Health & Medicine.* 2003;**8**:289-303.
  22. Howell D, Keller-Olaman S, Oliver T, et al. A Pan-Canadian Practice Guideline: Screening, Assessment and Care of Psychosocial Distress (Depression, Anxiety) in Adults with



1  
2  
3 Cancer. Toronto: Canadian Partnership Against Cancer (Cancer Journey Action Group) and the  
4 Canadian Association of Psychosocial Oncology 2010.  
5  
6

7  
8 23. Read CY, Perry DJ, Duffy ME. Design and psychometric evaluation of the Psychological  
9 Adaptation to Genetic Information Scale. *J Nurs Scholarsh*. 2005;**37**:203-8.  
10

11  
12 24. Jackson D. A sequential system for personality scale development. In: Spielberger C,  
13 editor. *Current Topics in Clinical and Community Psychology*. New York: Academic Press;  
14 1970. p. 61-96.  
15

16  
17  
18 25. Stuckless N, Goranson R. The vengeance scale: Development of a measure of attitudes  
19 toward revenge. *Journal of Social Behavior and Personality*. 1992;**7**:25-42.  
20

21  
22 26. Briggs SR, Cheek JM. The role of factor analysis in the development and evaluation of  
23 personality scales. *Journal of Personality*. 1986;**54**:106-48.  
24

25  
26  
27 27. Derogatis LR. The brief symptom inventory (BSI). Administration, Scoring and  
28 Procedures Manual. 3rd ed. New York: National Computer Systems; 1993.  
29

30  
31 28. Horowitz MJ, Wilner N, Alvarez W. Impact of Events Scale: A Measure of Subjective  
32 Stress. *Psychosomatic Medicine*. 1979;**41**:209-18.  
33

34  
35  
36 29. Hamilton MA. A rating scale for depression. *Journal of Neurology, Neurosurgery and*  
37 *Psychiatry*. 1960;**23**:56-23.  
38

39  
40 30. Katzelnick DJ, Simon GE, Pearson SD, et al. Randomized trial of a depression  
41 management program in high utilizers of medical care. *Arch Fam Med*. 2000;**9**:345-51.  
42

43  
44 31. DudokdeWit AC, Tibben A, Duivenvoorden HJ, et al. Predicting adaptation to  
45 presymptomatic DNA testing for late onset disorders: who will experience distress? Rotterdam  
46 Leiden Genetics Workgroup. *J Med Genet*. 1998;**35**:745-54.  
47

48  
49 32. Walsh W, Betz N. *Tests and Assessments*. New Jersey: Prentice Hall Inc; 1985.  
50

51  
52  
53 33. Melnick EL, Everitt BS. *Quantitative risk analysis and assessment*. Hebokea NJ: John  
54 Wiley & Sons; 2008.  
55  
56  
57  
58  
59  
60

- 1  
2  
3  
4  
5  
6  
7  
8  
9  
10  
11  
12  
13  
14  
15  
16  
17  
18  
19  
20  
21  
22  
23  
24  
25  
26  
27  
28  
29  
30  
31  
32  
33  
34  
35  
36  
37  
38  
39  
40  
41  
42  
43  
44  
45  
46  
47  
48  
49  
50  
51  
52  
53  
54  
55  
56  
57  
58  
59  
60
34. Moller HJ. Rating depressed patients: observer- vs self-assessment. *Eur Psychiatry*. 2000;**15**:160-72.
35. Aben I, Verhey F, Lousberg R, et al. Validity of the beck depression inventory, hospital anxiety and depression scale, SCL-90, and hamilton depression rating scale as screening instruments for depression in stroke patients. *Psychosomatics*. 2002;**43**:386-93.
36. Pasquini M, Biondi M, Costantini A, et al. Detection and treatment of depressive and anxiety disorders among cancer patients: feasibility and preliminary findings from a liaison service in an oncology division. *Depress Anxiety*. 2006;**23**:441-8.
37. Beck CT. A checklist to identify women at risk for developing postpartum depression. *J Obstet Gynecol Neonatal Nurs*. 1998;**27**:39-46.
38. Reid AJ, Biringer A, Carroll JD, et al. Using the ALPHA form in practice to assess antenatal psychosocial health. Antenatal Psychosocial Health Assessment. *CMAJ*. 1998;**159**:677-84.
39. Goutham R. What is an ROC curve? *The Journal of Family Practice*. 2003;**52**:695.
40. Esplen MJ, Hunter J. Therapy in the Setting of Genetic Predisposition to Cancer' in 'Handbook of Psychotherapy in Cancer Care. In: Watson M, Kissane D, editors. Handbook of Psychotherapy in Cancer Care. London: John Wiley & Sons Ltd; 2011. p. 201-12.
41. Lyons JS. A Communication Theory of Measurement in Human Service Settings. New York: Springer; 2009.
42. Broadstock M, Michie S, Gray J, et al. The psychological consequences of offering mutation searching in the family for those at risk of hereditary breast and ovarian cancer--a pilot study. *Psychooncology*. 2000;**9**:537-48.

**Table 1**  
**Description of Phase II Participants Characteristics (N=712)**

| Variables in GPRI*                                                                                       |                                                                                     |                                                 |
|----------------------------------------------------------------------------------------------------------|-------------------------------------------------------------------------------------|-------------------------------------------------|
| Age in years: mean (SD)                                                                                  |                                                                                     | 49.80 (+12.53),<br>range 18-80,<br>median 50.00 |
| Gender: n (%)                                                                                            | Male<br>Female                                                                      | 85 (12%)<br>627 (88%)                           |
| Type of AOHD being tested: n (%)                                                                         | Cancer (BRCA)<br>Cancer (other, ie, Colon)<br>Huntington disease<br>Hemochromatosis | 580 (82%)<br>90 (13%)<br>31 (4%)<br>5 (1%)      |
| Personal history of disease being tested: n (%)                                                          |                                                                                     | 441 (62%)                                       |
| Recent significant event (diagnosis of or loss of significant others to the disease being tested): n (%) |                                                                                     | 333 (47%)                                       |
| Disease worries affect daily mood (strongly agree or somewhat agree): n (%)                              |                                                                                     | 189 (27%)                                       |
| Sad in the past month (often or almost all the time): n (%)                                              |                                                                                     | 121 (17%)                                       |
| Anxious in the past month (often or almost all the time) n (%)                                           |                                                                                     | 121 (17%)                                       |

\* Note: there are missing data for some GRPI variables. The total count for each variable do not necessarily add up to 712

**Table 2**  
**Psychological Symptom of Distress 1 Month Post Genetic Testing Results**  
**By Disease Type (N=475)**

|                                                                                                                                                                                                                                                                                                                       | <b>Overall<br/>N (%)</b> | <b>Huntington</b> | <b>BRCA</b> | <b>Other<br/>Cancer</b> |
|-----------------------------------------------------------------------------------------------------------------------------------------------------------------------------------------------------------------------------------------------------------------------------------------------------------------------|--------------------------|-------------------|-------------|-------------------------|
| IES intrusion $\geq 17^a$                                                                                                                                                                                                                                                                                             | 60 (13.0%)               | 5 (23.8%)         | 51 (12.5%)  | 4 (9.5%)                |
| IES avoidance $\geq 17^a$                                                                                                                                                                                                                                                                                             | 65 (13.7%)               | 5 (23.8%)         | 57 (14.0%)  | 3 (7.1%)                |
| BSI-18 total $\geq 13^b$                                                                                                                                                                                                                                                                                              | 95 (20.1%)               | 6 (28.6%)         | 86 (21.1%)  | 3 (7.1%)                |
| <p>a. Shemesh E. et al (2004) Posttraumatic stress, non adherence, and adverse outcome in survivors of a myocardial infarction. <i>Psychosomatic Medicine</i>, 66: 521-526</p> <p>b. Zabora et al (2001): A new psychosocial screening instrument for use with cancer patients. <i>Psychosomatics</i>, 42:241-246</p> |                          |                   |             |                         |

**Table 3**  
**GPRI Factor Solutions and Factor Loadings**

|                                                                                                                                                                                           | Factor Loadings | Communalities | Item-Total | Item Mean |
|-------------------------------------------------------------------------------------------------------------------------------------------------------------------------------------------|-----------------|---------------|------------|-----------|
| • My worries about the disease affect my daily mood                                                                                                                                       | .759            | .652          | .582       | 2.22      |
| • I worry often about my risk of getting the disease                                                                                                                                      | .742            | .551          | .529       | 2.67      |
| • I am concerned about my risk of getting the disease                                                                                                                                     | .656            | .484          | .472       | 3.28      |
| • I have generally felt nervous and anxious in the past month                                                                                                                             | .652            | .538          | .600       | 2.54      |
| • I have generally felt sad in the past month                                                                                                                                             | .627            | .524          | .572       | 2.58      |
| • If I learn that I have a genetic mutation,<br>... I will have more problems in my life                                                                                                  | .617            | .406          | .399       | 2.79      |
| ...I will have difficulties with my family relationships                                                                                                                                  | .513            | .324          | .424       | 1.62      |
| ... I will change plans for my career                                                                                                                                                     | .451            | .228          | .262       | 2.08      |
| • The disease is currently causing a significant disruption in my family life                                                                                                             | .568            | .408          | .463       | 2.42      |
| • I am worried that my test result will impact on my relationship with my significant other                                                                                               | .546            | .308          | .383       | 2.54      |
| • I am worried about talking to my children about the heritable nature of the disease for which I am being tested                                                                         | .522            | .326          | .453       | 2.04      |
| • I feel guilty that I might pass on the disease risk to my children                                                                                                                      | .508            | .276          | .414       | 3.11      |
| Factor 1: Anticipated or experienced impact of having a disease risk or genetic mutation: 12 statements, Cronbach's alpha = .85, inter – item correlation = .32, variance explained = 22% |                 |               |            |           |
| • I have had emotional problems in the past                                                                                                                                               | .796            | .655          | .423       | 2.66      |
| • I have been diagnosed with a depressive or anxiety disorder in the past                                                                                                                 | .769            | .596          | .349       | 2.01      |
| • I have had counselling with a mental health professional in the past                                                                                                                    | .762            | .593          | .433       | 2.85      |
| • I have had emotional problems that led me to thoughts about suicide                                                                                                                     | .623            | .389          | .262       | 1.45      |
| • I am now seeing a counselor for one or more of these emotional concerns                                                                                                                 | .509            | .272          | .274       | 1.35      |
| Factor 2: Personal history or vulnerability to mental health issues or symptoms: 5 items, Cronbach's alpha = .76, inter – item correlation = .39, variance explained = 14%                |                 |               |            |           |
| • I have taken care of a very ill parent or another close family member                                                                                                                   | .687            | .493          | .116       | 2.36      |
| • I lost a close family member (e.g. parent/ sibling) to the disease for which I am receiving counseling/testing                                                                          | .667            | .445          | -.002      | 2.87      |
| • I have/had a personal diagnosis of the disease for which I am receiving counseling/testing                                                                                              | -.642           | .413          | -.073      | 3.47      |
| Factor 3: Personal or family history of the genetic disease being tested in the clinic: 3 items, Cronbach's alpha = .08, inter – item correlation = .03, variance explained = 8%          |                 |               |            |           |

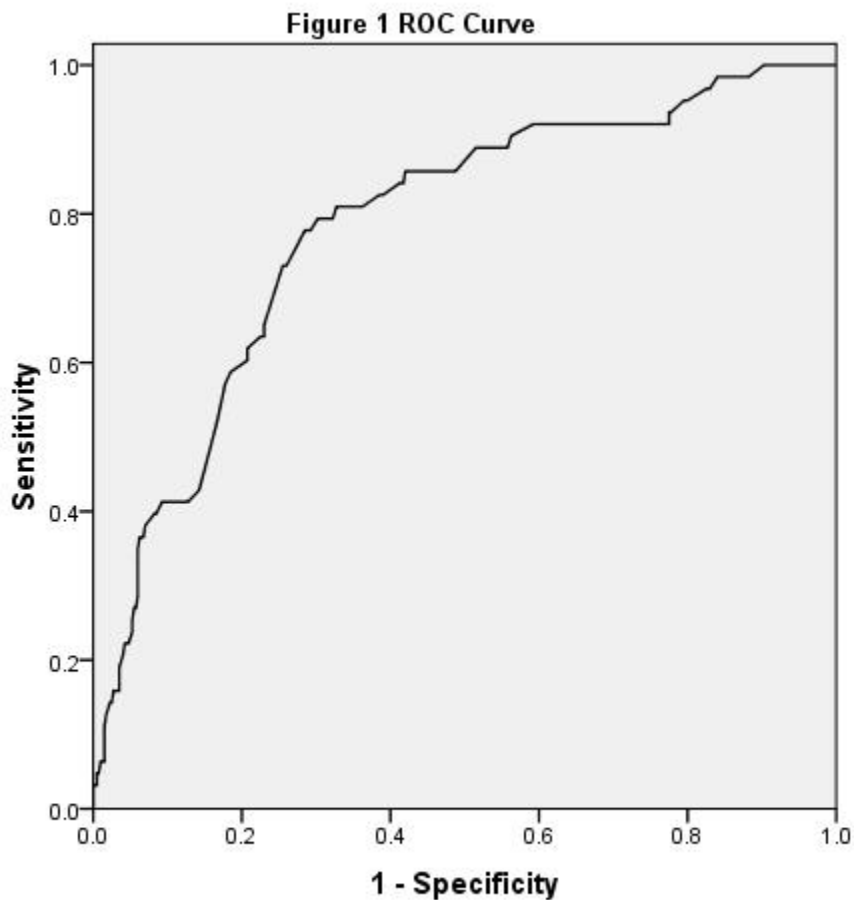

36 Diagonal segments are produced by ties.

For peer review only

## Appendix A Genetic Psychosocial Risk Instrument (GPRI)

The purpose of this questionnaire is to help identify individuals who may need additional support while going through genetic testing. The questions are about your life experiences and feelings about the disease for which you are receiving genetic testing/counseling. Please note that whenever the word "disease" is used, it is referring to the disease for which you are having genetic testing and/or counseling. Please read each statement carefully, then respond by placing a firm checkmark in the most appropriate space.

Name:

Date (dd / mm / yyyy):

- |                                                                                                                  |           |          |
|------------------------------------------------------------------------------------------------------------------|-----------|----------|
| 1. I have/had a personal diagnosis of the disease for which I am receiving counseling/testing                    | ( 5 ) Yes | ( 1 ) No |
| 2. I have taken care of a very ill parent or another close family member (e.g. sibling)                          | ( 0 ) Yes | ( 1 ) No |
| <u>If yes</u> , the illness was related to the condition for which I am receiving counseling/testing             | ( 5 ) Yes | ( 3 ) No |
| 3. I lost a close family member (e.g. parent/sibling) to the disease for which I am receiving counseling/testing | ( 5 ) Yes | ( 1 ) No |
| <u>If yes</u> , please indicate who the family member was who died (check all that apply):                       |           |          |
| ( 0 ) a parent    ( 0 ) a sibling    ( 0 ) other (specify) _____                                                 |           |          |

|                                                                                                                                    | Strongly agree | Somewhat agree | Neither agree/disagree | Somewhat disagree | Strongly disagree | Not applicable |
|------------------------------------------------------------------------------------------------------------------------------------|----------------|----------------|------------------------|-------------------|-------------------|----------------|
| 4. If I learn that I <u>have</u> a genetic mutation, I believe that:                                                               |                |                |                        |                   |                   |                |
| a. I will have more problems in my life                                                                                            | 5              | 4              | 3                      | 2                 | 1                 | 0              |
| b. I will change plans for my career/ profession                                                                                   | 5              | 4              | 3                      | 2                 | 1                 | 3              |
| c. I will have difficulties in my family relationships                                                                             | 5              | 4              | 3                      | 2                 | 1                 | 3              |
| 5. The disease for which I am at risk is <u>currently</u> causing a significant disruption in my family life                       | 5              | 4              | 3                      | 2                 | 1                 | 3              |
| 6. I am worried that my test result will impact on my relationship with my significant other (or future partner)                   | 5              | 4              | 3                      | 2                 | 1                 | 3              |
| 7. I am worried about talking to my children (young or adult) about the heritable nature of the disease for which I'm being tested | 5              | 4              | 3                      | 2                 | 1                 | 3              |
| 8. My worries about the disease affect my daily mood                                                                               | 5              | 4              | 3                      | 2                 | 1                 | 3              |
| 9. I worry often about my risk of getting the disease                                                                              | 5              | 4              | 3                      | 2                 | 1                 | 3              |
| 10. I am concerned about my risk of getting the disease                                                                            | 5              | 4              | 3                      | 2                 | 1                 | 3              |
| 11. I feel guilty that I might pass on the disease risk to my children                                                             | 5              | 4              | 3                      | 2                 | 1                 | 3              |

|                                                                 | Almost all of the time | Often | Sometimes | Hardly ever | Not at all |
|-----------------------------------------------------------------|------------------------|-------|-----------|-------------|------------|
| 12. I have generally felt sad in the past month                 | 5                      | 4     | 3         | 2           | 1          |
| 13. I have generally felt nervous and anxious in the past month | 5                      | 4     | 3         | 2           | 1          |

- |                                                                                            |           |          |
|--------------------------------------------------------------------------------------------|-----------|----------|
| 14. I have had emotional problems in the past                                              | ( 5 ) Yes | ( 1 ) No |
| 15. I have had counseling with a counselor and/or a mental health professional in the past | ( 5 ) Yes | ( 1 ) No |
| 16. I have been diagnosed with a depressive or anxiety disorder in the past                | ( 5 ) Yes | ( 1 ) No |
| 17. I have had emotional problems that led me to have thoughts about suicide               | ( 5 ) Yes | ( 1 ) No |
| 18. I am now seeing a counselor for one or more of these emotional concerns                | ( 5 ) Yes | ( 1 ) No |

- |                                                                                      |           |          |
|--------------------------------------------------------------------------------------|-----------|----------|
| 19. I am interested in talking with a counsellor about one or more of these concerns | ( 0 ) Yes | ( 0 ) No |
|--------------------------------------------------------------------------------------|-----------|----------|

**Instruction to the user:** Item #19 is for referral purpose only, no score is assigned. The remaining items all have assigned scores. Because item #4 has three sub-statements, a total of 20 statements/items are included in the scoring.

Please sum the score of all items & enter the total score here \_\_\_\_\_. If it is 50 or greater, and if #19 is Yes, then a psychosocial referral is recommended.

**For peer review only - <http://bmjopen.bmj.com/site/about/guidelines.xhtml>**

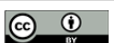



**Developing A Brief Screening Instrument for Psychosocial Risk Associated with Genetic Testing – A Pan Canadian Cohort Study**

|                                 |                                                                                                                                                                                                                                                                                                                                                                                                                                                                                                                                                                                                                                                                                                                                                                                                                                                                                                                                                                                                            |
|---------------------------------|------------------------------------------------------------------------------------------------------------------------------------------------------------------------------------------------------------------------------------------------------------------------------------------------------------------------------------------------------------------------------------------------------------------------------------------------------------------------------------------------------------------------------------------------------------------------------------------------------------------------------------------------------------------------------------------------------------------------------------------------------------------------------------------------------------------------------------------------------------------------------------------------------------------------------------------------------------------------------------------------------------|
| Journal:                        | <i>BMJ Open</i>                                                                                                                                                                                                                                                                                                                                                                                                                                                                                                                                                                                                                                                                                                                                                                                                                                                                                                                                                                                            |
| Manuscript ID:                  | bmjopen-2012-002227.R2                                                                                                                                                                                                                                                                                                                                                                                                                                                                                                                                                                                                                                                                                                                                                                                                                                                                                                                                                                                     |
| Article Type:                   | Research                                                                                                                                                                                                                                                                                                                                                                                                                                                                                                                                                                                                                                                                                                                                                                                                                                                                                                                                                                                                   |
| Date Submitted by the Author:   | 09-Feb-2013                                                                                                                                                                                                                                                                                                                                                                                                                                                                                                                                                                                                                                                                                                                                                                                                                                                                                                                                                                                                |
| Complete List of Authors:       | Esplen, Mary Jane; Toronto General Hospital, Behavioural Science & Health Research Division; de Souza Institute, Cappelli, Mario; Children's Hospital of Eastern Ontario, ; University of Ottawa,<br>Wong, Jiahui; de Souza Institute, ; University of Toronto, Department of Psychiatry<br>Bottorff, Joan; University of British Columbia Okanagan,<br>Hunter, Jon; Mount Sinai Hospital, ; University of Toronto, Department of Psychiatry<br>Carroll, June; Mount Sinai Hospital,<br>Dorval, Michel; Laval University,<br>Wilson, Brenda; University of Ottawa,<br>Allanson, Judith; Childrens Hospital of Eastern Ontario, Genetics<br>Semotiuk, Kara; Mount Sinai Hospital, Zane Cohen Centre for Digestive Diseases<br>Aronson, Melyssa; Mount Sinai Hospital, Zane Cohen Centre for Digestive Diseases<br>Bordeleau, Louise; McMaster University,<br>Charlemagne, Nicole; Toronto General Hospital, Behavioural Science & Health Research Division<br>Meschino, Wendy; North York General Hospital, |
| <b>Primary Subject Heading</b>: | Genetics and genomics                                                                                                                                                                                                                                                                                                                                                                                                                                                                                                                                                                                                                                                                                                                                                                                                                                                                                                                                                                                      |
| Secondary Subject Heading:      | Mental health                                                                                                                                                                                                                                                                                                                                                                                                                                                                                                                                                                                                                                                                                                                                                                                                                                                                                                                                                                                              |
| Keywords:                       | Genetics < TROPICAL MEDICINE, Cancer, Psychosocial, Screening, Psychosocial adjustment, behavioural science                                                                                                                                                                                                                                                                                                                                                                                                                                                                                                                                                                                                                                                                                                                                                                                                                                                                                                |
|                                 |                                                                                                                                                                                                                                                                                                                                                                                                                                                                                                                                                                                                                                                                                                                                                                                                                                                                                                                                                                                                            |

SCHOLARONE™  
Manuscripts



**Title**

Developing A Brief Screening Instrument for Psychosocial Risk Associated with Genetic Testing – A Pan Canadian Cohort Study

**Corresponding Author Address**

Mary Jane Esplen, PhD  
CIHR Scientist and Professor  
Department of Psychiatry, Faculty of Medicine, University of Toronto  
Behavioral Sciences and Health Research Division  
University Health Network  
200 Elizabeth Street, 9-EN-242A  
Toronto ON M5G 2C4 Canada  
Tel: (416) 340-3024  
Fax: (416) 340-4739  
Email: mesplen@uhnres.utoronto.ca

**List of Authors and Institutions**

Mary Jane Esplen PhD<sup>1,2,3</sup>, Mario Cappelli PhD<sup>4</sup>, Jiahui Wong PhD<sup>2,3</sup>, Joan Bottorff PhD<sup>5</sup>, Jon Hunter MD<sup>2,6</sup>, June Carroll MD<sup>6</sup>, Michel Dorval PhD<sup>7</sup>, Brenda Wilson PhD<sup>8</sup>, Judith Allanson MD<sup>9</sup>, Kara Semotiuk MSc<sup>10</sup>, Melyssa Aronson MSc<sup>10</sup>, Louise Bordeleau MD<sup>11</sup>, Nicole Charlemagne MSW<sup>1</sup>, Wendy Meschino MD<sup>12</sup>  
<sup>1</sup>University Health Network, Toronto ON; <sup>2</sup>University of Toronto: Department of Psychiatry, Toronto ON; <sup>3</sup>de Souza Institute, Toronto ON; <sup>4</sup>Children's Hospital of Eastern Ontario, Ottawa ON; <sup>5</sup>University of British Columbia Okanagan, Kelowna BC; <sup>6</sup>Mount Sinai Hospital, Toronto ON; <sup>7</sup>Laval University, Quebec QC; <sup>8</sup>University of Ottawa, Ottawa ON; <sup>9</sup>Eastern Ontario Regional Genetics Centre, Ottawa ON; <sup>10</sup>Zane Cohen Centre for Digestive Diseases, Mount Sinai Hospital, Toronto ON; <sup>11</sup>McMaster University, Hamilton ON; <sup>12</sup>North York General Hospital, Toronto ON.

**Keywords:**

Genetics, Psychosocial, Screening, Psychosocial Problems, Psychosocial Functioning, Psychological Risk Factors

**Word Count:** 5124

**Abstract:**

Objectives: To develop a brief, reliable and valid instrument to screen psychosocial risk among those who are undergoing genetic testing for Adult-Onset Hereditary Disease (AOHD).

Design: A prospective two-phase cohort study.

Setting: 5 genetic testing centres for AOHD such as cancer, Huntingtons, or Hemochromatosis, in ambulatory clinics of tertiary hospitals across Canada.

Participants: 141 individuals undergoing genetic testing were approached and consented to the instrument development phase of the study (Phase I). The Genetic Psychosocial Risk Instrument (GPRI) developed in Phase I was tested in Phase II for item refinement and validation. A separate cohort of 722 individuals consented to the study, 712 completed the baseline package, and 463 completed all follow-up assessments. Most participants were female, at mid-life stage. Individuals in advanced stages of the illness or with cognitive impairment or language barrier were excluded.

Interventions: Phase I: GPRI items were generated from 1) a review of the literature, 2) input from genetic counselors and 3) phase I participants. Phase II: further item refinement and validation was conducted with a second cohort of participants who completed the GPRI at baseline and were followed for psychological distress one month post genetic testing results.

Primary and secondary outcome measures: GPRI, Hamilton Depression Rating Scale (HAM-D), Hamilton Anxiety Rating Scale (HAM-A), Brief Symptom Inventory (BSI), and Impact of Event Scale (IES).

Results: The final 20 item GPRI had a high reliability - Cronbach's Alpha at 0.81. The construct validity was supported by high correlations between GPRI and BSI and IES. The predictive value was demonstrated by a Receiver Operating Characteristic (ROC) curve of 0.78 plotting GPRI against follow-up assessments using HAM-D and HAM-A.

Conclusions: With a cut off score of 50, GPRI identified 84% of participants who displayed distress post genetic testing results, supporting its potential usefulness in a clinical setting.

Word count: 299

Trial registration: Not applicable

## Summary

### 1) Article Focus

- A significant group of individuals undergoing genetic testing for Adult onset disease experience distress or challenges in adaptation, some might develop depression or anxiety
- Existing psychological screening tools do not take into consideration “risk factors” associated with heritable illness or genetic-related stressors
- A screening tool designed for genetic testing services is a useful tool to guide clinicians in relation to which patients would benefit from added psychosocial support during the genetic testing process.

### 2) Key Messages

- A subgroup of patients undergoing genetic testing required added psychosocial support to facilitate adaptation to genetic/ risk information. Busy genetic service providers can face challenges to identify these individuals and provide timely interventions or referrals.
- A new brief instrument was designed and validated to identify those individuals at risk for psychological distress such as depression or anxiety who are undergoing genetic testing for adult onset diseases.
- This is the first study to develop and validate a psychological screening instrument for genetic testing field.

### 3) Strengths and Limitations

- This newly developed tool, Genetic Psychosocial Risk Instrument (GPRI), is the first reported psychosocial screening instrument for use across Adult Onset Hereditary Diseases.
- The GPRI demonstrates promising psychometric properties as a tool designed to assist genetics health care providers determine which of their patients undergoing genetic testing for AOHD is at increased psychological risk and who will benefit from added psychosocial support.
- Study findings are limited by the characteristics of the sample, most participants were female and undergoing testing for BRCA1/2. Future studies could further address the validity of GPRI in male populations and in the rare adult onset hereditary diseases, such as Huntington’s disease.

## INTRODUCTION

Genetic predisposition is an important determinant of chronic disease and disability. Despite the benefits of genetic testing, such as increased screening or prophylactic interventions, individuals at high risk for serious illness may become increasingly fearful or distressed about the future. In fact, a consistent finding is that the majority of individuals do adjust to genetic test results, however a subset of individuals undergoing genetic testing for Adult Onset Hereditary Disease (AOHD) experience psychological distress, such as anxiety or depressive symptoms. A screening tool, designed for the genetic testing context, would be helpful in assisting geneticists, genetic counselors or primary care providers to identify this particular group for the implementation of appropriate preventive or follow-up interventions. Herein, we present a newly developed psychological risk screening instrument that can be readily used within a genetic service for AOHD.

### **Risk Factors and Psychological Impact of Genetic Testing: The Evidence**

The knowledge of genetic risk is life-long and individuals and families often find themselves confronted with an ongoing need to face issues and make decisions. Examples include decision-making around prevention and treatment options (e.g. increased surveillance, prophylactic surgery, chemoprevention), the need to notify family members about a mutation in the family, and in personal decision-making, for example decisions involving childbearing [1, 2]. Studies utilizing standardized measures of distress (e.g. global measures of anxiety or depression symptoms) have demonstrated that 8 to 25% of individuals undergoing genetic testing experience distress, the level of which falls within the clinical ranges for depression and anxiety [2-5]. Studies that have utilized standardized measures of *distress-specific distress* (i.e.

1  
2  
3 instruments measuring breast/ovarian cancer worry) have demonstrated higher prevalence levels  
4  
5 [6, 7].  
6  
7

8 The risk factors for psychological symptoms amongst individuals undergoing genetic  
9 testing have been delineated in several studies [4, 8, 9]. While there is generally elevated  
10 distress using global measures for depression or anxiety among those who receive positive test  
11 results [9-11], individuals testing negative or receiving uninformative results may also have  
12 adjustment difficulties [12] following testing. For example, individuals may feel guilt or  
13 continue to worry about their disease risk even when testing negative [2, 7, 12]. These findings  
14 highlight the importance of considering risk factors in addition to the type of test result itself.  
15 Individuals who have elevated psychological symptoms at the pre-test stage and those with a  
16 previous psychiatric history (i.e., depression) are particularly at risk for an adverse psychological  
17 outcome after testing [2, 8, 9].  
18  
19  
20  
21  
22  
23  
24  
25  
26  
27  
28  
29  
30  
31

32 Additional risk factors for distress are more specific to the genetics context and include  
33 the level of penetrance of the gene mutation or degree of certainty of developing the disease [4].  
34 The perception of control over the disease (including the number of prevention/treatment  
35 options) and perception of the immediacy of risk (proximity in age to perceived disease onset)  
36 are important predictors [4, 13]. The expectation of a negative test result can play a role in  
37 adjustment, as can the context of test results of other family members [9, 14]. As in other  
38 medical areas, specific coping styles can affect adjustment [15]. The prior experiences with loss  
39 of family members to disease, as well as the developmental level (i.e. young age) of the  
40 individual at the time of the loss [2, 3, 16] are significant factors affecting potential adjustment.  
41  
42  
43  
44  
45  
46  
47  
48  
49  
50  
51  
52  
53 In addition, the prior experience of giving care to a family member with the disease and lower  
54  
55  
56  
57  
58  
59  
60

1  
2  
3 levels of social support have been associated with poorer adjustment following a positive test  
4  
5 result [2-4, 8, 16].  
6  
7

8 It is clear that there is not one predominant factor, but rather, a series of variables that can  
9  
10 be assessed prior to receiving a test result that may contribute to elevated levels of psychological  
11  
12 distress following genetic testing [2, 17]. Emotional reactions may impede the assimilation of  
13  
14 risk information and the adoption of preventive measures recommended following notification of  
15  
16 a mutation [2, 18]. Psychological distress occurs along a continuum [19, 20] and can be difficult  
17  
18 to identify by health professionals [21]. Distress may not become manifest to the health care  
19  
20 team until the patient reaches an observable crisis level, i.e. the onset of severe depression or  
21  
22 anxiety, or significant conflicts with the family. An early screening instrument would enable  
23  
24 healthcare providers to identify patients being at higher psychological risk in order that  
25  
26 appropriate support can be given at the right time. In fact, there is now a general consensus that  
27  
28 genetic testing should be accompanied by psychological support to promote optimal adjustment  
29  
30 [2, 22].  
31  
32  
33  
34  
35  
36  
37  
38

### 39 **Screening for Psychological Risk Factors- Why is it necessary?**

40  
41 The gold standard for identifying psychologically distressed individuals involves structured  
42  
43 clinical interviews administered by a clinical psychologist or psychiatrist [21]. However, it is too  
44  
45 costly and often not feasible in genetic clinics. Standardized measures of psychological  
46  
47 functioning (e.g. global scales of depression or anxiety) can also be used as a method for  
48  
49 identifying distress. However, few clinics use these measures in practice because of personnel  
50  
51 and time requirements for scoring and interpretation of them. Furthermore, items on these  
52  
53 measures typically focus on symptoms of anxiety or depression, rather than on variables  
54  
55  
56  
57  
58  
59  
60

1  
2  
3 associated with heritable disease or genetic testing or risk, which may pose barriers for use by  
4 genetics health service providers who may prefer instruments that, at face value, appear to them  
5 and their patients as being clinically more relevant to the genetic testing context.  
6  
7  
8  
9

10 More recently, new outcome measures designed to assess the psychological impact of  
11 receiving genetic information have been developed. For example, the Multidimensional Impact  
12 of Cancer Risk Assessment (MICRA) is designed to assess concerns and impacts associated with  
13 genetic testing for BRCA1/2 [19] and another tool, the Psychological Adaptation to Genetic  
14 Information Scale, is now available [23]. While these measures will require further validation  
15 they provide more clinically relevant approaches to capturing specific impacts of genetic  
16 information, such as the increased sense of vulnerability often experienced following genetic  
17 testing [19, 23].  
18  
19  
20  
21  
22  
23  
24  
25  
26  
27  
28

29 Measures of global psychological functioning and the evolving outcome measurement  
30 tools for the genetics field are not designed to “predict” vulnerability for future distress, but  
31 rather, measure current distress levels. Screening, the aim of the tool developed in this study in  
32 contrast, is a rapid, cost-effective alternative [21] to prospectively identify individuals who may  
33 experience significant difficulty in their attempts to adapt to their genetic information [17]. A  
34 screening tool enables providers to offer timely and focused educational and psychosocial  
35 interventions to *prevent* future distress.  
36  
37  
38  
39  
40  
41  
42  
43  
44  
45

46 The primary *objective* of this study was to develop a brief, reliable and valid  
47 psychological risk screening instrument for use in the genetic testing context. The new  
48 instrument aimed to incorporate empirically based risk factors for psychological symptoms and  
49 would need to show a high sensitivity, specificity and predictive validity indicating risk for  
50 future distress post genetic testing results. A cutoff point would need to be determined to guide  
51  
52  
53  
54  
55  
56  
57  
58  
59  
60

1  
2  
3 clinical decisions as to whether or not to refer, further assess, or intervene to reduce an  
4  
5 individual's expressed concern.  
6  
7  
8  
9

## 10 **METHODS AND MATERIALS**

11  
12 The study was carried out from September 2005 to July 2010, with research ethics board  
13 approval from participating genetics clinics: Toronto (Mount Sinai Hospital, North York General  
14 Hospital, Princess Margaret Hospital); Ottawa (Children's Hospital of Eastern Ontario); and  
15 Vancouver (British Columbia Cancer Agency). Individuals beginning the genetic testing process  
16 for AOHD at each site were approached by genetic counsellors on the project team for their  
17 permission to be contacted about the study. Those who expressed interest were mailed the  
18 baseline package that included the informed consent. The informed consent included all  
19 components of the study, including questionnaires, follow-up phone calls, telephone interviews,  
20 as well as to the release of their genetic testing information to the research team.  
21  
22  
23  
24  
25  
26  
27  
28  
29  
30  
31  
32  
33

34 A two phase approach was used for this study: **Phase I: Item Generation and Refinement**,  
35 and **Phase II: Validation**. The multi-stage method [24] takes validation into consideration at  
36 each stage of scale development and has been used successfully in previous studies [25].  
37  
38  
39  
40  
41  
42

### 43 **Phase I: Item Generation and Refinement.**

#### 44 ***Item generation***

45  
46 To generate items for the Genetic Psychosocial Risk Instrument (GPRI), a literature search was  
47 performed for the following AOHDs: Cancer (Hereditary Breast-Ovarian Cancer Syndrome/  
48 Lynch Syndrome), Huntington Disease (HD), and Hemochromatosis. These diseases were  
49 selected as they represented the majority of patients attending genetic clinics and had an  
50  
51  
52  
53  
54  
55  
56  
57  
58  
59  
60



1  
2  
3 associated available psychosocial literature for review. Databases including Cinahl (1982 to  
4 2006), Medline (1966 to 2006), PsychInfo (1985 to 2006), and Pubmed (1985 to 2006) were  
5 searched as well as hand search of references from major publications. Keywords included:  
6 genetic screening, genetic testing, psychological, psychological well-being, psychological  
7 adjustment, stress, adaptation, cancer worry, disease worry, and distress. Selection criteria for the  
8 literature review included studies with a follow-up design or review articles. Each selected study  
9 was reviewed by two reviewers on its quality of evidence and generalizability using a  
10 standardized template. A total of 73 relevant studies were identified among the disease groups:  
11 49 on cancer, 20 on HD, 2 on Hemochromatosis, and 2 described mixed conditions.  
12  
13  
14  
15  
16  
17  
18  
19  
20  
21  
22  
23  
24

25 Risk factors for psychological distress identified by the literature review provided the  
26 basis for item generation. Items were written in a mixed format where respondents were asked  
27 for their endorsement of each statement ranging from Yes/No for risk factors of binary nature, to  
28 a 5-point likert-type scale for risk factors with stages in frequency and/or intensity. The  
29 instrument items were further refined by 10 genetic service providers (3 geneticists, 4 genetic  
30 counselors, 2 oncologists, 1 genetics nurse) rating items on *comprehension, readability, and*  
31 *perceived clinical relevance* using a ten-point scale with 0 being "excellent/definitely relevant"  
32 and 10 being "very poor/definitely not relevant". Risk factor items were removed if rated above  
33 five by more than 3 providers. Providers were also asked to suggest additional risk factor items.  
34 These suggestions were checked against the literature for empirical evidence. Following this  
35 step, 7 volunteers undergoing genetic testing for AOHDs were recruited to try out the scale for  
36 clarity, succinctness and relevance from the clients' perspectives. At this stage, the proposed  
37 instrument consisted of 56 items: demographics (4 items); perceived risk (8 items); life events  
38 and family history of the disease (8 items); perceived impact of carrying a mutation (9 items);  
39  
40  
41  
42  
43  
44  
45  
46  
47  
48  
49  
50  
51  
52  
53  
54  
55  
56  
57  
58  
59  
60

1  
2  
3 family communication (6 items); disease specific concerns (5 items); optimism (3 items); social  
4 support (3 items), pre-morbid functioning and previous psychiatric history (10 items).  
5  
6  
7  
8  
9

### 10 ***Item refinement:***

11  
12 Subjects: Following informed consent, a convenient sample of 141 participants who had given  
13 blood for genetic tests at the Toronto and Ottawa sites completed the GPRI (using a three  
14 patients per item ratio) to select the best items for the candidate scale. The participants were  
15 middle aged ( $48.67 \pm 13.29$ ), mostly female (77%) testing for hereditary breast cancer, and many  
16 (65%) had already suffered the onset of the illness.  
17  
18  
19  
20  
21  
22  
23

24 Scoring: To ensure that binary items carry an equal weight as the 5-point likert-type  
25 items, a score of 5 was assigned to *Yes* and 1 to *No*. A score of 3 or mean-substitute was assigned  
26 to *Not Applicable* to allow it to be counted in the total score. Reliability analysis was carried out  
27 and a Cronbach's Alpha was set for .75 or higher for the scale to move to the next phase [26].  
28 Any item with an item-total correlation less than .20 was identified for potential removal. Using  
29 team consensus, a total of 19 items were removed, combined or substituted, resulting in a 37  
30 item GPRI candidate scale at the end of phase I.  
31  
32  
33  
34  
35  
36  
37  
38  
39  
40  
41  
42

### 43 **Phase II: Scale Validation**

44  
45 Subjects: Individuals undergoing genetic testing for one of the AOHDs in each of the five study  
46 sites were invited to participate: 1) age 18 or above undergoing genetic testing for cancer, HD, or  
47 Hemochromatosis; 2) fluent in English; and 3) residing within 1.5 hours driving distance from  
48 study site. Although the onset of an AOHD was not an exclusion criterion, individuals in  
49 advanced stages of the illness and / or who were unable to consent due to cognitive impairment  
50  
51  
52  
53  
54  
55  
56  
57  
58  
59  
60

1  
2  
3 were excluded. At baseline, participants were asked to complete a set of self-report  
4  
5 questionnaires (e.g. Brief Symptom Inventory, etc.) described below within a one month period  
6  
7 following the provision of a blood sample. For those who received a genetic test result,  
8  
9 questionnaires were mailed within two weeks to one month of the disclosure of test result. These  
10  
11 participants were also telephoned to complete the Hamilton Depression and Hamilton telephone-  
12  
13 based Anxiety Scales to further assess depressive and anxiety symptoms. .  
14  
15

16  
17 Materials: At baseline, three psychosocial measures were used: GPRI Candidate Scale  
18  
19 from Phase I. To facilitate scoring of the scale by genetic providers, scores for response to each  
20  
21 item on the GPRI were imbedded in the questionnaire, where clinicians could calculate a total  
22  
23 score in less than 5 minutes. Brief Symptom Inventory (BSI) The BSI is a 53-item measure of  
24  
25 psychological distress that contains three global scales i) depression, ii) anxiety and iii)  
26  
27 somatization [27]. While it has some limitations being a self-report measure it has been well-  
28  
29 validated and widely used in medical and psychiatric populations to assess psychological  
30  
31 functioning; Impact of Event Scale (IES): The IES is a 15-item, likert-style scale used to assess  
32  
33 the experience of a specific stress response and is designed to be easily anchored in relation to a  
34  
35 specific stressor or life event. It has been extensively utilized in the genetics literature to assess  
36  
37 genetic testing-related distress; we similarly anchored the IES items in relation to the anticipation  
38  
39 of the genetic test result at baseline and in relation to the actual genetic test at follow- up . The  
40  
41 IES has two sub-scales: i) intrusive thoughts and feelings associated with the stressful life event,  
42  
43 and ii) items associated with patterns of avoidance of certain thoughts, feelings, or situations  
44  
45 [28].  
46  
47  
48  
49  
50  
51

52  
53 Measures at one month post genetic testing results included: the self -reports scales of the  
54  
55 BSI, IES and each participant received a telephone call for the telephone-based Hamilton  
56  
57  
58  
59  
60

1  
2  
3 Depression 29-item Rating Scale (HAM-D) and Hamilton Anxiety Rating Scale (HAM-A). The  
4  
5 HAM-D evaluates depressed mood, vegetative and cognitive symptoms of depression, and  
6  
7 comorbid anxiety symptoms [29]. The HAM-A quantifies the severity of anxiety  
8  
9 symptomatology and consists of 14 items. The HAM-D and HAM-A have demonstrated validity  
10  
11 in clinical interview, in person or by telephone [30]. These two instruments were selected as  
12  
13 main outcome measures based on the literature that the standardized interview based-rating  
14  
15 scales should be used over subjective report scales as the principal outcome criterion in  
16  
17 psychological distress both in general practice and in research trials [34]. Cases would be defined  
18  
19 by established cut-offs from the literature for HAM-D  $\geq 12$  [35] or HAM-A  $\geq 10$  [36]. These  
20  
21 cut off points were established for populations in general practice, which was our study  
22  
23 population.  
24  
25  
26  
27  
28

29 The one-month follow-up time point was selected as it is when elevated distress might  
30  
31 occur [31]. In addition, the 2-week duration criterion for depression defined by the Diagnostic  
32  
33 and Statistical Manual of Mental Disorders, Fourth Edition (DSM-IV) is met by this time frame.  
34  
35  
36  
37  
38

### 39 **Assessing Psychometric Property of the Scale**

40  
41 As a first step, items were required to have at least an 80% response rate. Second, each item was  
42  
43 examined to determine its contribution to the internal consistency of the total 37-item scale. The  
44  
45 minimum item-total correlation was set at .20 [32].  
46  
47

48 A principal components factor analysis with varimax rotation was performed on the  
49  
50 candidate scale to examine the factor structure and the loading of the items. To assess the  
51  
52 *convergent validity* of the candidate scale, the correlations between baseline GPRI, IES and BSI  
53  
54 were calculated. To assess the *sensitivity, specificity and predictive value* of the GPRI, the  
55  
56  
57  
58  
59  
60

1  
2  
3 follow-up HAM-D and HAM-A were used to identify “cases” who met cut offs for either the  
4 depression or anxiety symptomatology. For example, participants with a high GPRI at baseline  
5 would be classified as “at risk” for future onset of adjustment difficulties. This would be  
6 confirmed by a high HAM-D or HAM-A score or “case” during 1 month follow-up. Similarly,  
7 those with a low GPRI score should receive low score in HAM-D or HAM-A as “non-cases”.  
8 The predictive value of the GRPI, describing the number of test-positives (in our case, high  
9 GPRI) who truly have the psychological condition (i.e. cases identified by HAM-D or HAM-A),  
10 was tested by a Receiver Operating Characteristic (ROC) curve which visually plotted the true  
11 positive rate (sensitivity) over false positive rate (1-specificity). We included cases to be  
12 identified by either anxiety and/or depressive symptomatology as both have been reported in the  
13 literature [8, 9].  
14  
15  
16  
17  
18  
19  
20  
21  
22  
23  
24  
25  
26  
27  
28

29 To address the issue of missing follow-up data in a cohort study, as suggested in the  
30 literature [33], we tested the assumption that the sub sample with missing data had a similar  
31 baseline exposure (similar GPRI) as the non-missing subsample by comparing baseline GPRI  
32 between the participants and dropouts. This step assesses if there was systematic bias resulting  
33 from the loss of information in the follow-up period.  
34  
35  
36  
37  
38  
39  
40  
41  
42

## 43 RESULTS

### 44 Participant characteristics

45  
46 Study packages were mailed to 1129 individuals interested in hearing more about the study. Of  
47 these individuals, 722 of them consented and 712 (98%) completed the GPRI. Most participants  
48 were tested for the inheritable cancers, while a small percentage of participants were tested for  
49  
50  
51  
52  
53  
54  
55  
56  
57  
58  
59  
60

1  
2  
3 hemochromatosis and HD. Similar to phase I, phase II participants were mostly female, at mid-  
4  
5 life stage, and more than half had a past diagnosis of the disease (see table 1).  
6  
7

8 **Insert Table 1 about Here**  
9

10 Of the 712 participants, 85 (12%) did not receive genetic testing results at the scheduled  
11 follow-up time and were not eligible for follow-up measures on psychological symptoms in  
12 response to a genetic testing result. Of the remaining 627 participants, 152 (24%) did not return  
13 the self-administered follow-up questionnaires and 12 (2%) submitted the follow-up  
14 questionnaire package but did not complete a standardized telephone interview using HAM-D  
15 and HAM-A (up to 4 telephone calls were made to reach each participant). Therefore the final  
16 number of participants with complete follow-up data is 463 (74%). The age, and baseline GPRI  
17 score between individuals who did not receive genetic testing results (age  $51.4 \pm 12.7$ , GPRI  
18  $49.3 \pm 12.7$ ), those who did not return the follow-up questionnaires (age  $48.1 \pm 11.6$ , GPRI  
19  $50.2 \pm 14.4$ ) and those who completed follow-up measures (age  $50.1 \pm 12.8$ , GPRI  $49.1 \pm 13.5$ ) were  
20 compared. There was no statistically significant group difference (ANOVA and all post-hoc  
21 comparisons  $p > 0.05$ ).  
22  
23  
24  
25  
26  
27  
28  
29  
30  
31  
32  
33  
34  
35  
36  
37

38 Because of the similarity between the dropouts and completers, we proceeded with  
39 reliability and validity analysis of the tool using the subsample that provided outcome data.  
40  
41

42 We carried out the calculations for distress level, for example, for depression and anxiety  
43 symptoms using the BSI data, for specific distress associated a genetic test result using the IES.  
44  
45 Approximately, 13.0% to 20.1% of participants reached the threshold of moderate to severe  
46 distress respectively (see table 2).  
47  
48  
49  
50  
51

52 **Insert Table 2 about Here**  
53  
54  
55  
56  
57  
58  
59  
60

1  
2  
3 HAM-D and HAM-A interview data from 463 participants were used as a further  
4 validation tool to measure psychological symptoms post genetic testing results. Defined by cut-  
5 offs for HAM-D  $\geq 12$  [35] or HAM-A  $\geq 10$  in the literature [36], the rates for psychological  
6 distress of either depression or anxiety was 13.7% (N=63). The rate was 13% for HD, 15% for  
7 breast cancer and 7% for Lynch Syndrome.  
8  
9  
10  
11  
12  
13

### 14 15 16 17 **Reliability and Factor Analysis**

18  
19 A reliability analysis was performed on 37 items. Twenty items belonging to 18 questions were  
20 selected based on the criteria for item selection described in the methods section. The  
21 Cronbach's alpha of the 20 item GPRI was 0.81 suggesting a good level of internal consistency.  
22  
23  
24  
25  
26

27 The factor analysis resulted in a psychometrically sound 3-factor solution, with subscales  
28 representing the dimensions of: 1) *Perceived impact and personal adjustment to genetic testing*  
29 (12 items); 2) *Past history of mental health concerns* (5 items) and 3) *Personal history/family*  
30 *history/loss to cancer* (3 items). All three factors met the minimum Eigenvalue criteria of 1.  
31  
32  
33  
34  
35

36 The first, 12-item factor (ALPHA = 0.85), accounting for 22% of the variance, includes  
37 items associated with the anticipated or experienced impact of being at high risk for AOHD.  
38 Example items included: "My worries about the disease affect my daily mood"; "The disease for  
39 which I am at risk is currently causing a significant disruption in my family life".  
40  
41  
42  
43  
44  
45

46 The second 5-item factor (ALPHA = 0.76), accounted for an additional 14% of the total  
47 variance, and reflected a sense of a person's past history or vulnerability in the area of mental  
48 health, e.g. "I have had emotional problems in the past", These items have been used in other  
49 medical health areas [37, 38] and tend to be predictive of maladjustment [20] following a life  
50 event.  
51  
52  
53  
54  
55  
56  
57  
58  
59  
60

1  
2  
3 The third 3 item factor (ALPHA = 0.08), accounted for 8% of the total variance and  
4 pertained to personal or family-related experiences associated with the hereditary disorder for  
5 which the participant is undergoing testing. . Examples include: “I have a personal diagnosis of  
6 the disease for which I am receiving counseling”; “I lost a close family member to the disease for  
7 which I am receiving counseling”; and “I have taken care of a very ill parent or another close  
8 family member”. These 3 final items had low item total correlation because they were different  
9 from the rest of the items in that they focused on direct experiences related to the illness, rather  
10 than psychosocial-related items. These items were kept in the scale as they contributed  
11 significantly to the overall variance, and correlated highly with HAM-D and HAM-A. To  
12 determine the relationships between the three factors/subscales, correlations were computed.  
13 Factor1 and factor2 had moderate correlations with each other (factor1/factor2  $r=0.30$ ,  $p<0.01$ ).  
14 The correlation of the first two factors with factor3 was much lower as expected (factor1/factor3  
15  $r=0.06$ , and factor2/factor3  $r=0.01$ , not statistically significant). These results support the  
16 multidimensional character of the GPRI scale (see Table 3).  
17  
18  
19  
20  
21  
22  
23  
24  
25  
26  
27  
28  
29  
30  
31  
32  
33  
34  
35

36  
37 **Insert Table 3 about Here**  
38

39 One additional statement “I am interested in talking to a counselor about one or more of  
40 these concerns” was added to the tool at the end as suggested by participants and providers to  
41 remind them the option of seeing a counselor if required. This statement is not part of the items  
42 examined during the instrument development and therefore does not carry a score.  
43  
44  
45  
46  
47

48 The total score for the 20 item GPRI ranged from 20 to 100, with a sample mean  
49  $49.36\pm 13.23$ . The total was calculated by the sum of the raw scores for each of the statements.  
50 Females had a significantly higher score for the GPRI than males ( $50.37\pm 13.14$  vs.  $41.91\pm 11.47$ ,  
51  
52  
53  
54  
55  
56  
57  
58  
59  
60



1  
2  
3 p<0.01), and participants testing for HD had a higher, but non-significant score than participants  
4  
5 testing for cancer (52.24±13.24 vs. 49.37±13.22, n.s.).  
6  
7

## 8 9 **Validity**

10  
11 Construct validity – correlations: The GPRI was assessed for its correlation with other  
12  
13 standardized self-report measures of psychological functioning collected at baseline. Convergent  
14  
15 validity was demonstrated by the correlation between the GPRI and the following measures: a  
16  
17 positive correlation with the IES total score at  $r = .51$ ,  $p < .001$ , and with BSI at  $r = .58$ ,  $p < .001$ .  
18  
19

20  
21 Sensitivity, specificity and the predictive value of GPRI for future distress: The telephone  
22  
23 interview-based HAM-D and HAM-A were used to identify subjects who presented specific  
24  
25 psychological symptoms of distress such as depression and/or anxiety during the one month post  
26  
27 genetic testing follow-up. A total of 63 “cases” (13.6% of 463 completers) were identified as  
28  
29 having psychological distress levels above specified thresholds defined in the methods section  
30  
31 for either anxiety or depression symptoms or both. About 23% among participants testing  
32  
33 positive met the distress threshold, as did 10% among those with negative results, and 20%  
34  
35 among uninformative. Participants scoring above HAM-D (N=55) threshold had significantly  
36  
37 higher GPRI scores than participants below the threshold (N=408) (61.12±13.27 vs.  
38  
39 47.91±12.27,  $p < 0.01$ ). Same patterns were observed for HAM-A high (N=40) vs. low (N=423)  
40  
41 (62.53±12.92 vs. 48.25± 12.43,  $p < 0.01$ ).  
42  
43  
44  
45  
46

47  
48 Other demographic characteristics of these 63 subjects include: most were female and  
49  
50 undergoing testing for BRCA1/2, which was similar to the whole sample of 712 (table 1).

51  
52 Compared with the whole sample, these subjects had a slightly higher percentage of personal  
53  
54 history of cancer (65% vs. 62%), higher rate of recent significant event of loss (56% vs. 47%),  
55  
56 greater percentage reporting disease worries affecting mood (54.8% vs. 27%), having a feeling of  
57  
58  
59  
60

1  
2  
3 sadness in the past month (46% vs. 17%) and anxiousness in the past month (33% vs. 17%). Our  
4 instrument captured all of these characteristics of this subsample.  
5  
6

7  
8 The predictive value of a test describes how many of the test-positives (in this case, a  
9 high score on GPRI) truly have the psychological condition. An ROC curve was used to plot the  
10 true positive rate (sensitivity) over the false positive rate (1-specificity). A good ROC curve rises  
11 sharply, indicating a high proportion in true positive and a low proportion of false positives. The  
12 ROC curve for the GPRI was 0.78, which is considered as an indicator of an adequate screening  
13 instrument [39].  
14  
15  
16  
17  
18  
19  
20  
21

22 An important purpose of the GRPI in our study was to identify individuals at risk for post  
23 genetic testing psychological distress. Therefore, the cutoff value was set to maximize sensitivity  
24 – in another word, not to miss detecting a “case”. Using a GPRI cut off score of 50, the  
25 instrument was able to predict 84% of the “cases” identified by HAM-D or HAM-A conducted  
26 post genetic testing results, with a specificity value of 60% (Figure 1).  
27  
28  
29  
30  
31  
32  
33

34 **Insert Figure 1 about Here**  
35  
36  
37

## 38 **DISCUSSION**

39  
40 The aim of this study was to develop a brief, easy-to-use psychosocial screening instrument  
41 specific for the genetic testing context and to examine its reliability and validity (Appendix A).  
42  
43 To our knowledge this is the first report of a psychosocial screening instrument for use across  
44 AOHD. Unlike current psychological instruments used mainly in research studies in genetics  
45 clinics to identify existing global symptoms of depression and anxiety, or impacts, the GPRI  
46 assesses *psychological risk factors*, such as the specific anticipated impacts of a genetic testing  
47 result and the perception of the disease. The GPRI demonstrates promising psychometric  
48  
49  
50  
51  
52  
53  
54  
55  
56  
57  
58  
59  
60

1  
2  
3 properties as a tool designed to assist genetics health care providers determine which of their  
4  
5 patients undergoing genetic testing for AOHD is at increased psychological risk and should  
6  
7 likely be considered for additional psychosocial support to facilitate adjustment to a test result.  
8  
9

10 A high reliability was demonstrated by a Cronbach's Alpha at 0.81, moderate to high  
11  
12 item-total correlation and inter-item correlation of the whole scale. The construct validity of the  
13  
14 scale was supported by high correlations between the GPRI and standardized psychological  
15  
16 measures (BSI, IES). The clinical utility and predictive value of the GPRI was supported as  
17  
18 well. A GPRI score above the cutoff of 50 at baseline was able to predict 84% of “distress” cases  
19  
20 identified by HAM-D or HAM-A, a strong indicator of its potential usefulness in a clinical  
21  
22 setting.  
23  
24  
25

26  
27 A brief self-administered screening tool will be easy and likely highly acceptable for  
28  
29 incorporation into genetics clinics. The GPRI can be completed and scored quickly during  
30  
31 clinical visits and without additional burden to patients and health providers. In addition, by  
32  
33 focusing specifically on known risk factors associated with inheritable illness, the instrument  
34  
35 will be perceived as being more clinically relevant and acceptable to patients. Patients with  
36  
37 higher GPRI scores can be flagged and either receive telephone follow-up to further assess  
38  
39 concerns or potential distress or be invited back for an appointment for further assessment and  
40  
41 required psychological treatment.  
42  
43  
44

45  
46 Alternatively, genetic clinics with available psychosocial personnel could utilize the tool  
47  
48 to guide referrals for a formal psychosocial assessment that can further explore and address  
49  
50 specific self-reported psychological factors. For example, in the case where an individual is  
51  
52 particularly fearful of developing an illness or is concerned about specific impacts, such as  
53  
54 expecting relationship or family communications difficulties, information on communication  
55  
56  
57  
58  
59  
60

1  
2  
3 strategies, personal coaching or family-based interventions could be employed to support the  
4 individual. For an individuals who reports a past history of psychological illness, a mental health  
5 professional could further assess current psychological functioning and implement specific  
6 approaches, and could offer cognitive-behavioral strategies or psychotropic medication to assist  
7 in the management of anxiety or depressive symptoms [40]. Several items incorporate variables  
8 related to heritable disease experiences and associated perceptions which can be used to guide  
9 educational interventions to correct any myths or beliefs.

10  
11  
12  
13  
14  
15  
16  
17  
18  
19  
20 The scale appeared highly acceptable to patients. A high face validity will contribute to  
21 better scale uptake being perceived as “user friendly” and clinically relevant, compared for  
22 example, to a standardized psychological instrument on depression, which have demonstrated  
23 some barriers to clinic uptake [19]. The GPRI in contrast might be considered as a  
24 “communimetric measure”, that is, the items themselves are useful for the clinician in  
25 communicating concerns about specific areas of functioning directly with the patient [41].  
26  
27  
28  
29  
30  
31  
32  
33

34 Left untreated, significant levels of psychological symptoms may lead to lower quality  
35 of life [40], and lower satisfaction with genetics services [21]. A psychological screening  
36 approach allows both for careful monitoring during a known stressful period-that of awaiting test  
37 results [42], and provides an opportunity for any planned follow-up care. Flagging those  
38 individuals who might benefit most from psychosocial care also best utilizes the often limited  
39 psychological resources in genetic clinics [2, 20, 21].  
40  
41  
42  
43  
44  
45  
46  
47

48 Our study findings are limited by the characteristics of the sample, in that most  
49 participants were female and undergoing testing for *BRCA1/2*. This pattern is similar to that  
50 observed in the literature on genetic testing for AOHD, which is predominantly focused on  
51 Hereditary Breast-Ovarian Cancer Syndrome. We attempted to obtain a larger sample of  
52  
53  
54  
55  
56  
57  
58  
59  
60

1  
2  
3 individuals undergoing genetic testing for HD or Lynch Syndrome which would presumably  
4 provide a greater sample of males. However, these sample pools were much smaller. However,  
5  
6 this study and the resulting GPRI represent an attempt to begin the development of a general tool  
7  
8 that addresses concerns that are relevant across genetic samples. Our belief stemming from  
9  
10 clinical practice and the associated literature suggest that the identified mental health issues or  
11  
12 adjustment risk factors are not disease specific. We suggest that future studies further address the  
13  
14 validity of GPRI in male populations and in the rare adult onset hereditary diseases, such as HD.  
15  
16 Future studies should also include randomized controlled trials to assess the effectiveness of the  
17  
18 GPRI in predicting distress, its impact on referral patterns, patient and provider satisfaction, as  
19  
20 well as on cost-effectiveness. The GPRI could also be evaluated in primary care settings where  
21  
22 genetics services might be offered more frequently to meet the demand.  
23  
24  
25  
26  
27  
28  
29  
30  
31

## 32 CONCLUSIONS

33  
34 This is the first study to develop a screening tool specifically to help identify individuals  
35  
36 undergoing genetic testing for AOHD who are at increased psychological risk. The study  
37  
38 resulted in an easy to use, 20-item scale consisting of 3 factors with promising psychometric  
39  
40 properties. The GPRI has the potential to be used as a clinical screening tool and as a validated  
41  
42 measure for future studies. Future work can examine its impact on clinical referral patterns  
43  
44 within the field of genetics, and on its acceptability, reliability and validity with larger samples  
45  
46 of individuals undergoing genetic testing for HD, Lynch Syndrome, and potentially for emerging  
47  
48 new genetic tests, such as for cardiac or psychiatric disorders.  
49  
50  
51  
52  
53  
54  
55  
56  
57  
58  
59  
60

## Acknowledgement

The first author is a recipient of a career scientist award from the Canadian Institutes of Health Research (CIHR) and the Ontario Women's Health Council. This study was funded by Canadian Institutes of Health Research (CIHR) Grant No. AHC 73144. We would like to express our gratitude to all the genetic testing patients who participated in our study. Thank you for your contribution towards this very important work and the development of the instrument. Thank you also to the genetic counselors and clinic staff from the participating genetic centers who assisted in recruitment: Children's Hospital of Eastern Ontario (Eastern Ontario Regional Genetics Centre); North York General Hospital (Clinical Genetics); Mount Sinai Hospital (Familial GI Cancer Registry & Familial Breast Cancer Clinic); Princess Margaret Hospital (Familial Breast & Ovarian Cancer Clinic); and BC Cancer Agency (Hereditary Cancer Program). We would also like to thank the research staff for their commitment and hard work to complete this national multi-site study. Finally, the team would like to pay special recognition to the late Dr. Anne Summers, who was co-investigator on the team. Her dedication to the need for empirically based tools and her strong vision to support recipients of new genetic technology were key influences in the conceptualization, funding and completion of this study.

**Ethics:** Research Ethics Board approval was obtained at all five participating sites: Toronto (Mount Sinai Hospital, North York General Hospital, Princess Margaret Hospital); Ottawa (Children's Hospital of Eastern Ontario); and Vancouver (British Columbia Cancer Agency).

**Data Sharing Statement:** There is no additional data available

**Conflict of Interest:** The authors do not have any conflict of interest to disclose.

**Funding:** This study was funded by Canadian Institutes of Health Research (CIHR) Grant No. AHC 73144.

## Contributorship Statements

### Dr. Mary Jane Esplen

Principal Applicant responsible for leading all aspects of the research, oversees budget, hiring staff, supervising data collection, analysis and interpretation, and writing of all manuscripts and reports.

### Dr. Mario Cappelli

Co-principal inv. responsible for assisting in item generation and refinement, the implementation of data collection, interpretation of findings and writing of manuscripts and reports.

### Dr. Jiahui Wong

Co- Applicant responsible assisting in instrument development, statistical procedures, sampling and interpretation of findings and writing of manuscripts and reports.

### Dr. Joan Bottorff

Co-Applicant responsible for refining of items, guiding the recruitment of providers and testing of the instrument in genetic services, development of guidelines and writing of manuscripts and reports.

### Dr. Jon Hunter

Co-Applicant responsible for assisting in item generation and refinement, guideline development, interpretation of findings and writing of manuscripts and reports.

### Dr. June Carroll

Co-Applicant responsible for assisting in item generation and refinement, implementation of the screening validation strategy and development of guidelines, interpretation of findings and writing of manuscripts and reports.

### Dr. Michel Dorval

Co-Applicant responsible for refining of items, guiding the recruitment of providers and testing of the instrument in genetic services, interpretation of findings and writing of manuscripts and reports.

**Dr. Brenda Wilson**

Co-Applicant responsible for co-leading the implementation of the consensus guidelines components of the proposed study. Will assist in item generation for tool, interpretation of findings, writing of manuscripts and reports.

**Dr. Judith Allanson**

Co-Applicant responsible for refining of items, guiding the recruitment of providers/patients and testing of the instrument in genetic services, development of guidelines and writing of manuscripts and reports.

**Ms. Kara Semotiuk**

Co-Applicant responsible for refining of items, guiding the recruitment of providers and testing of the instrument in genetic services and development of guidelines, and writing of manuscripts and reports.

**Ms. Melyssa Aronson**

Co-Applicant responsible for refining of items, guiding the recruitment of providers and testing of the instrument in genetic services, development of guidelines and writing of manuscripts and reports.

**Dr. Louise Bordeleau**

Co-Applicant responsible for overseeing recruitment at MSH and UHN site in Toronto, testing of instrument and interpretation of findings, writing of manuscripts and reports.

**Ms. Nicole Charlemagne**

Project coordinator, responsible for: patient recruitment and follow-up; assisting in item generation, refinement, and overall layout and design of tool; data collection, data entry, and data clean-up; revisions and submission of manuscript.

**Dr. Wendy Meschino**

Co-Applicant responsible for refining of items, guiding the recruitment of providers and testing of the instrument in genetic services, interpretation of findings and writing of manuscripts and reports.



## REFERENCES

1. Lerman C, Croyle RT. Emotional and behavioral responses to genetic testing for susceptibility to cancer. *Oncology (Williston Park)*. 1996;**10**:191-5, 9; discussion 200-2.
2. Bleiker EM, Hahn DE, Aaronson NK. Psychosocial issues in cancer genetics--current status and future directions. *Acta Oncol*. 2003;**42**:276-86.
3. Wellisch DK, Lindberg NM. A psychological profile of depressed and nondepressed women at high risk for breast cancer. *Psychosomatics*. 2001;**42**:330-6.
4. Broadstock M, Michie S, Marteau T. Psychological consequences of predictive genetic testing: a systematic review. *Eur J Hum Genet*. 2000;**8**:731-8.
5. Ho SM, Ho JW, Bonanno GA, et al. Hopefulness predicts resilience after hereditary colorectal cancer genetic testing: a prospective outcome trajectories study. *BMC Cancer*. 2010;**10**:279.
6. Trask PC, Paterson AG, Wang C, et al. Cancer-specific worry interference in women attending a breast and ovarian cancer risk evaluation program: impact on emotional distress and health functioning. *Psychooncology*. 2001;**10**:349-60.
7. Coyne JC, Kruus L, Racioppo M, et al. What do ratings of cancer-specific distress mean among women at high risk of breast and ovarian cancer? *Am J Med Genet A*. 2003;**116A**:222-8.
8. Marteau TM, Croyle RT. The new genetics. Psychological responses to genetic testing. *BMJ*. 1998;**316**:693-6.
9. Meiser B. Psychological impact of genetic testing for cancer susceptibility: an update of the literature. *Psychooncology*. 2005;**14**:1060-74.
10. Hamilton JG, Lobel M, Moyer A. Emotional distress following genetic testing for hereditary breast and ovarian cancer: a meta-analytic review. *Health Psychol*. 2009;**28**:510-8.
11. Shaw C, Abrams K, Marteau TM. Psychological impact of predicting individuals' risks of illness: a systematic review. *Soc Sci Med*. 1999;**49**:1571-98.

- 1  
2  
3 12. Dorval M, Gauthier G, Maunsell E, et al. No evidence of false reassurance among women  
4 with an inconclusive BRCA1/2 genetic test result. *Cancer Epidemiol Biomarkers Prev.*  
5 2005;**14**:2862-7.  
6  
7
- 8  
9 13. Cameron LD, Sherman KA, Marteau TM, et al. Impact of genetic risk information and  
10 type of disease on perceived risk, anticipated affect, and expected consequences of genetic tests.  
11 *Health Psychol.* 2009;**28**:307-16.  
12  
13
- 14 14. Smith KR, West JA, Croyle RT, et al. Familial context of genetic testing for cancer  
15 susceptibility: moderating effect of siblings' test results on psychological distress one to two  
16 weeks after BRCA1 mutation testing. *Cancer Epidemiol Biomarkers Prev.* 1999;**8**:385-92.  
17  
18
- 19 15. Dougall AL, Smith AW, Somers TJ, et al. Coping with genetic testing for breast cancer  
20 susceptibility. *Psychosom Med.* 2009;**71**:98-105.  
21  
22
- 23 16. Esplen MJ, Urquhart C, Butler K, et al. The experience of loss and anticipation of distress  
24 in colorectal cancer patients undergoing genetic testing. *J Psychosom Res.* 2003;**55**:427-35.  
25  
26
- 27 17. Zabora JR. Screening procedures for psychological distress. In: Holland JC, editor.  
28 Psycho-Oncology. New York: Oxford University Press; 1998. p. 653-62.  
29  
30
- 31 18. Watson M, Lloyd S, Davidson J, et al. The impact of genetic counselling on risk  
32 perception and mental health in women with a family history of breast cancer. *Br J Cancer.*  
33 1999;**79**:868-74.  
34  
35
- 36 19. Cella D, Hughes C, Peterman A, et al. A brief assessment of concerns associated with  
37 genetic testing for cancer: the Multidimensional Impact of Cancer Risk Assessment (MICRA)  
38 questionnaire. *Health Psychol.* 2002;**21**:564-72.  
39  
40
- 41 20. Zabora J, BrintzenhofeSzoc K, Curbow B, et al. The prevalence of psychological distress  
42 by cancer site. *Psychooncology.* 2001;**10**:19-28.  
43  
44
- 45 21. Thewes B, Meiser B, Tucker K, et al. Screening for psychological distress and  
46 vulnerability factors in women at increased risk for breast cancer: A review of the literature.  
47 *Psychology, Health & Medicine.* 2003;**8**:289-303.  
48  
49
- 50 22. Howell D, Keller-Olaman S, Oliver T, et al. A Pan-Canadian Practice Guideline:  
51 Screening, Assessment and Care of Psychosocial Distress (Depression, Anxiety) in Adults with  
52  
53  
54  
55  
56  
57  
58  
59  
60

1  
2  
3 Cancer. Toronto: Canadian Partnership Against Cancer (Cancer Journey Action Group) and the  
4 Canadian Association of Psychosocial Oncology 2010.  
5  
6

7  
8 23. Read CY, Perry DJ, Duffy ME. Design and psychometric evaluation of the Psychological  
9 Adaptation to Genetic Information Scale. *J Nurs Scholarsh*. 2005;**37**:203-8.  
10

11  
12 24. Jackson D. A sequential system for personality scale development. In: Spielberger C,  
13 editor. *Current Topics in Clinical and Community Psychology*. New York: Academic Press;  
14 1970. p. 61-96.  
15

16  
17  
18 25. Stuckless N, Goranson R. The vengeance scale: Development of a measure of attitudes  
19 toward revenge. *Journal of Social Behavior and Personality*. 1992;**7**:25-42.  
20

21  
22 26. Briggs SR, Cheek JM. The role of factor analysis in the development and evaluation of  
23 personality scales. *Journal of Personality*. 1986;**54**:106-48.  
24

25  
26  
27 27. Derogatis LR. The brief symptom inventory (BSI). Administration, Scoring and  
28 Procedures Manual. 3rd ed. New York: National Computer Systems; 1993.  
29

30  
31 28. Horowitz MJ, Wilner N, Alvarez W. Impact of Events Scale: A Measure of Subjective  
32 Stress. *Psychosomatic Medicine*. 1979;**41**:209-18.  
33

34  
35 29. Hamilton MA. A rating scale for depression. *Journal of Neurology, Neurosurgery and*  
36 *Psychiatry*. 1960;**23**:56-23.  
37

38  
39  
40 30. Katzelnick DJ, Simon GE, Pearson SD, et al. Randomized trial of a depression  
41 management program in high utilizers of medical care. *Arch Fam Med*. 2000;**9**:345-51.  
42

43  
44 31. DudokdeWit AC, Tibben A, Duivenvoorden HJ, et al. Predicting adaptation to  
45 presymptomatic DNA testing for late onset disorders: who will experience distress? Rotterdam  
46 Leiden Genetics Workgroup. *J Med Genet*. 1998;**35**:745-54.  
47

48  
49 32. Walsh W, Betz N. *Tests and Assessments*. New Jersey: Prentice Hall Inc; 1985.  
50

51  
52  
53 33. Melnick EL, Everitt BS. *Quantitative risk analysis and assessment*. Hebokea NJ: John  
54 Wiley & Sons; 2008.  
55  
56  
57  
58  
59  
60

- 1  
2  
3  
4  
5  
6  
7  
8  
9  
10  
11  
12  
13  
14  
15  
16  
17  
18  
19  
20  
21  
22  
23  
24  
25  
26  
27  
28  
29  
30  
31  
32  
33  
34  
35  
36  
37  
38  
39  
40  
41  
42  
43  
44  
45  
46  
47  
48  
49  
50  
51  
52  
53  
54  
55  
56  
57  
58  
59  
60
34. Moller HJ. Rating depressed patients: observer- vs self-assessment. *Eur Psychiatry*. 2000;**15**:160-72.
35. Aben I, Verhey F, Lousberg R, et al. Validity of the beck depression inventory, hospital anxiety and depression scale, SCL-90, and hamilton depression rating scale as screening instruments for depression in stroke patients. *Psychosomatics*. 2002;**43**:386-93.
36. Pasquini M, Biondi M, Costantini A, et al. Detection and treatment of depressive and anxiety disorders among cancer patients: feasibility and preliminary findings from a liaison service in an oncology division. *Depress Anxiety*. 2006;**23**:441-8.
37. Beck CT. A checklist to identify women at risk for developing postpartum depression. *J Obstet Gynecol Neonatal Nurs*. 1998;**27**:39-46.
38. Reid AJ, Biringer A, Carroll JD, et al. Using the ALPHA form in practice to assess antenatal psychosocial health. Antenatal Psychosocial Health Assessment. *CMAJ*. 1998;**159**:677-84.
39. Goutham R. What is an ROC curve? *The Journal of Family Practice*. 2003;**52**:695.
40. Esplen MJ, Hunter J. Therapy in the Setting of Genetic Predisposition to Cancer' in 'Handbook of Psychotherapy in Cancer Care. In: Watson M, Kissane D, editors. Handbook of Psychotherapy in Cancer Care. London: John Wiley & Sons Ltd; 2011. p. 201-12.
41. Lyons JS. A Communication Theory of Measurement in Human Service Settings. New York: Springer; 2009.
42. Broadstock M, Michie S, Gray J, et al. The psychological consequences of offering mutation searching in the family for those at risk of hereditary breast and ovarian cancer--a pilot study. *Psychooncology*. 2000;**9**:537-48.

**Title**

Developing A Brief Screening Instrument for Psychosocial Risk Associated with Genetic Testing – A Pan Canadian Cohort Study

**Corresponding Author Address**

Mary Jane Esplen, PhD  
CIHR Scientist and Professor  
Department of Psychiatry, Faculty of Medicine, University of Toronto  
Behavioral Sciences and Health Research Division  
University Health Network  
200 Elizabeth Street, 9-EN-242A  
Toronto ON M5G 2C4 Canada  
Tel: (416) 340-3024  
Fax: (416) 340-4739  
Email: mesplen@uhnres.utoronto.ca

**List of Authors and Institutions**

Mary Jane Esplen PhD<sup>1,2,3</sup>, Mario Cappelli PhD<sup>4</sup>, Jiahui Wong PhD<sup>2,3</sup>, Joan Bottorff PhD<sup>5</sup>, Jon Hunter MD<sup>2,6</sup>, June Carroll MD<sup>6</sup>, Michel Dorval PhD<sup>7</sup>, Brenda Wilson PhD<sup>8</sup>, Judith Allanson MD<sup>9</sup>, Kara Semotiuk MSc<sup>10</sup>, Melyssa Aronson MSc<sup>10</sup>, Louise Bordeleau MD<sup>11</sup>, Nicole Charlemagne MSW<sup>1</sup>, Wendy Meschino MD<sup>12</sup>  
<sup>1</sup>University Health Network, Toronto ON; <sup>2</sup>University of Toronto: Department of Psychiatry, Toronto ON; <sup>3</sup>de Souza Institute, Toronto ON; <sup>4</sup>Children's Hospital of Eastern Ontario, Ottawa ON; <sup>5</sup>University of British Columbia Okanagan, Kelowna BC; <sup>6</sup>Mount Sinai Hospital, Toronto ON; <sup>7</sup>Laval University, Quebec QC; <sup>8</sup>University of Ottawa, Ottawa ON; <sup>9</sup>Eastern Ontario Regional Genetics Centre, Ottawa ON; <sup>10</sup>Zane Cohen Centre for Digestive Diseases, Mount Sinai Hospital, Toronto ON; <sup>11</sup>McMaster University, Hamilton ON; <sup>12</sup>North York General Hospital, Toronto ON.

**Keywords:**

Genetics, Psychosocial, Screening, Psychosocial Problems, Psychosocial Functioning, Psychological Risk Factors

**Word Count:** 5124

**Abstract:**

Objectives: To develop a brief, reliable and valid instrument to screen psychosocial risk among those who are undergoing genetic testing for Adult-Onset Hereditary Disease (AOHD).

Design: A prospective two-phase cohort study.

Setting: 5 genetic testing centres for AOHD such as cancer, Huntingtons, or Hemochromatosis, in ambulatory clinics of tertiary hospitals across Canada.

Participants: 141 individuals undergoing genetic testing were approached and consented to the instrument development phase of the study (Phase I). The Genetic Psychosocial Risk Instrument (GPRI) developed in Phase I was tested in Phase II for item refinement and validation. A separate cohort of 722 individuals consented to the study, 712 completed the baseline package, and 463 completed all follow-up assessments. Most participants were female, at mid-life stage. Individuals in advanced stages of the illness or with cognitive impairment or language barrier were excluded.

Interventions: Phase I: GPRI items were generated from 1) a review of the literature, 2) input from genetic counselors and 3) phase I participants. Phase II: further item refinement and validation was conducted with a second cohort of participants who completed the GPRI at baseline and were followed for psychological distress one month post genetic testing results.

Primary and secondary outcome measures: GPRI, Hamilton Depression Rating Scale (HAM-D), Hamilton Anxiety Rating Scale (HAM-A), Brief Symptom Inventory (BSI), and Impact of Event Scale (IES).

Results: The final 20 item GPRI had a high reliability - Cronbach's Alpha at 0.81. The construct validity was supported by high correlations between GPRI and BSI and IES. The predictive value was demonstrated by a Receiver Operating Characteristic (ROC) curve of 0.78 plotting GPRI against follow-up assessments using HAM-D and HAM-A.

Conclusions: With a cut off score of 50, GPRI identified 84% of participants who displayed distress post genetic testing results, supporting its potential usefulness in a clinical setting.

Word count: 299

Trial registration: Not applicable

## Summary

### 1) Article Focus

- A significant group of individuals undergoing genetic testing for Adult onset disease experience distress or challenges in adaptation, some might develop depression or anxiety
- Existing psychological screening tools do not take into consideration “risk factors” associated with heritable illness or genetic-related stressors
- A screening tool designed for genetic testing services is a useful tool to guide clinicians in relation to which patients would benefit from added psychosocial support during the genetic testing process.

### 2) Key Messages

- A subgroup of patients undergoing genetic testing required added psychosocial support to facilitate adaptation to genetic/ risk information. Busy genetic service providers can face challenges to identify these individuals and provide timely interventions or referrals.
- A new brief instrument was designed and validated to identify those individuals at risk for psychological distress such as depression or anxiety who are undergoing genetic testing for adult onset diseases.
- This is the first study to develop and validate a psychological screening instrument for genetic testing field.

### 3) Strengths and Limitations

- This newly developed tool, Genetic Psychosocial Risk Instrument (GPRI), is the first reported psychosocial screening instrument for use across Adult Onset Hereditary Diseases.
- The GPRI demonstrates promising psychometric properties as a tool designed to assist genetics health care providers determine which of their patients undergoing genetic testing for AOHD is at increased psychological risk and who will benefit from added psychosocial support.
- Study findings are limited by the characteristics of the sample, most participants were female and undergoing testing for BRCA1/2. Future studies could further address the validity of GPRI in male populations and in the rare adult onset hereditary diseases, such as Huntington’s disease.

## INTRODUCTION

Genetic predisposition is an important determinant of chronic disease and disability. Despite the benefits of genetic testing, such as increased screening or prophylactic interventions, individuals at high risk for serious illness may become increasingly fearful or distressed about the future. In fact, a consistent finding is that the majority of individuals do adjust to genetic test results, however a subset of individuals undergoing genetic testing for Adult Onset Hereditary Disease (AOHD) experience psychological distress, such as anxiety or depressive symptoms. A screening tool, designed for the genetic testing context, would be helpful in assisting geneticists, genetic counselors or primary care providers to identify this particular group for the implementation of appropriate preventive or follow-up interventions. Herein, we present a newly developed psychological risk screening instrument that can be readily used within a genetic service for AOHD.

### **Risk Factors and Psychological Impact of Genetic Testing: The Evidence**

The knowledge of genetic risk is life-long and individuals and families often find themselves confronted with an ongoing need to face issues and make decisions. Examples include decision-making around prevention and treatment options (e.g. increased surveillance, prophylactic surgery, chemoprevention), the need to notify family members about a mutation in the family, and in personal decision-making, for example decisions involving childbearing [1, 2]. Studies utilizing standardized measures of distress (e.g. global measures of anxiety or depression symptoms) have demonstrated that 8 to 25% of individuals undergoing genetic testing experience distress, the level of which falls within the clinical ranges for depression and anxiety [2-5]. Studies that have utilized standardized measures of *distress-specific distress* (i.e.



1  
2  
3 instruments measuring breast/ovarian cancer worry) have demonstrated higher prevalence levels  
4  
5  
6 [6, 7].  
7

8 The risk factors for psychological symptoms amongst individuals undergoing genetic  
9 testing have been delineated in several studies [4, 8, 9]. While there is generally elevated  
10 distress using global measures for depression or anxiety among those who receive positive test  
11 results [9-11], individuals testing negative or receiving uninformative results may also have  
12 adjustment difficulties [12] following testing. For example, individuals may feel guilt or  
13 continue to worry about their disease risk even when testing negative [2, 7, 12]. These findings  
14 highlight the importance of considering risk factors in addition to the type of test result itself.  
15 Individuals who have elevated psychological symptoms at the pre-test stage and those with a  
16 previous psychiatric history (i.e., depression) are particularly at risk for an adverse psychological  
17 outcome after testing [2, 8, 9].  
18  
19  
20  
21  
22  
23  
24  
25  
26  
27  
28  
29  
30  
31

32 Additional risk factors for distress are more specific to the genetics context and include  
33 the level of penetrance of the gene mutation or degree of certainty of developing the disease [4].  
34 The perception of control over the disease (including the number of prevention/treatment  
35 options) and perception of the immediacy of risk (proximity in age to perceived disease onset)  
36 are important predictors [4, 13]. The expectation of a negative test result can play a role in  
37 adjustment, as can the context of test results of other family members [9, 14]. As in other  
38 medical areas, specific coping styles can affect adjustment [15]. The prior experiences with loss  
39 of family members to disease, as well as the developmental level (i.e. young age) of the  
40 individual at the time of the loss [2, 3, 16] are significant factors affecting potential adjustment.  
41 In addition, the prior experience of giving care to a family member with the disease and lower  
42  
43  
44  
45  
46  
47  
48  
49  
50  
51  
52  
53  
54  
55  
56  
57  
58  
59  
60

1  
2  
3 levels of social support have been associated with poorer adjustment following a positive test  
4  
5 result [2-4, 8, 16].  
6  
7

8 It is clear that there is not one predominant factor, but rather, a series of variables that can  
9  
10 be assessed prior to receiving a test result that may contribute to elevated levels of psychological  
11  
12 distress following genetic testing [2, 17]. Emotional reactions may impede the assimilation of  
13  
14 risk information and the adoption of preventive measures recommended following notification of  
15  
16 a mutation [2, 18]. Psychological distress occurs along a continuum [19, 20] and can be difficult  
17  
18 to identify by health professionals [21]. Distress may not become manifest to the health care  
19  
20 team until the patient reaches an observable crisis level, i.e. the onset of severe depression or  
21  
22 anxiety, or significant conflicts with the family. An early screening instrument would enable  
23  
24 healthcare providers to identify patients being at higher psychological risk in order that  
25  
26 appropriate support can be given at the right time. In fact, there is now a general consensus that  
27  
28 genetic testing should be accompanied by psychological support to promote optimal adjustment  
29  
30 [2, 22].  
31  
32  
33  
34  
35  
36  
37  
38

### 39 **Screening for Psychological Risk Factors- Why is it necessary?**

40  
41 The gold standard for identifying psychologically distressed individuals involves structured  
42  
43 clinical interviews administered by a clinical psychologist or psychiatrist [21]. However, it is too  
44  
45 costly and often not feasible in genetic clinics. Standardized measures of psychological  
46  
47 functioning (e.g. global scales of depression or anxiety) can also be used as a method for  
48  
49 identifying distress. However, few clinics use these measures in practice because of personnel  
50  
51 and time requirements for scoring and interpretation of them. Furthermore, items on these  
52  
53 measures typically focus on symptoms of anxiety or depression, rather than on variables  
54  
55  
56  
57  
58  
59  
60

1  
2  
3 associated with heritable disease or genetic testing or risk, which may pose barriers for use by  
4 genetics health service providers who may prefer instruments that, at face value, appear to them  
5 and their patients as being clinically more relevant to the genetic testing context.  
6  
7  
8  
9

10 More recently, new outcome measures designed to assess the psychological impact of  
11 receiving genetic information have been developed. For example, the Multidimensional Impact  
12 of Cancer Risk Assessment (MICRA) is designed to assess concerns and impacts associated with  
13 genetic testing for BRCA1/2 [19] and another tool, the Psychological Adaptation to Genetic  
14 Information Scale, is now available [23]. While these measures will require further validation  
15 they provide more clinically relevant approaches to capturing specific impacts of genetic  
16 information, such as the increased sense of vulnerability often experienced following genetic  
17 testing [19, 23].  
18  
19  
20  
21  
22  
23  
24  
25  
26  
27  
28

29 Measures of global psychological functioning and the evolving outcome measurement  
30 tools for the genetics field are not designed to “predict” vulnerability for future distress, but  
31 rather, measure current distress levels. Screening, the aim of the tool developed in this study in  
32 contrast, is a rapid, cost-effective alternative [21] to prospectively identify individuals who may  
33 experience significant difficulty in their attempts to adapt to their genetic information [17]. A  
34 screening tool enables providers to offer timely and focused educational and psychosocial  
35 interventions to *prevent* future distress.  
36  
37  
38  
39  
40  
41  
42  
43  
44  
45

46 The primary *objective* of this study was to develop a brief, reliable and valid  
47 psychological risk screening instrument for use in the genetic testing context. The new  
48 instrument aimed to incorporate empirically based risk factors for psychological symptoms and  
49 would need to show a high sensitivity, specificity and predictive validity indicating risk for  
50 future distress post genetic testing results. A cutoff point would need to be determined to guide  
51  
52  
53  
54  
55  
56  
57  
58  
59  
60

1  
2  
3 clinical decisions as to whether or not to refer, further assess, or intervene to reduce an  
4  
5 individual's expressed concern.  
6  
7  
8  
9

## 10 **METHODS AND MATERIALS**

11  
12 The study was carried out from September 2005 to July 2010, with research ethics board  
13 approval from participating genetics clinics: Toronto (Mount Sinai Hospital, North York General  
14 Hospital, Princess Margaret Hospital); Ottawa (Children's Hospital of Eastern Ontario); and  
15 Vancouver (British Columbia Cancer Agency). Individuals beginning the genetic testing process  
16 for AOHD at each site were approached by genetic counsellors on the project team for their  
17 permission to be contacted about the study. Those who expressed interest were mailed the  
18 baseline package that included the informed consent. The informed consent included all  
19 components of the study, including questionnaires, follow-up phone calls, telephone interviews,  
20 as well as to the release of their genetic testing information to the research team.  
21  
22  
23  
24  
25  
26  
27  
28  
29  
30  
31  
32  
33

34 A two phase approach was used for this study: **Phase I: Item Generation and Refinement**,  
35 and **Phase II: Validation**. The multi-stage method [24] takes validation into consideration at  
36 each stage of scale development and has been used successfully in previous studies [25].  
37  
38  
39  
40  
41  
42

### 43 **Phase I: Item Generation and Refinement.**

#### 44 ***Item generation***

45  
46 To generate items for the Genetic Psychosocial Risk Instrument (GPRI), a literature search was  
47 performed for the following AOHDs: Cancer (Hereditary Breast-Ovarian Cancer Syndrome/  
48 Lynch Syndrome), Huntington Disease (HD), and Hemochromatosis. These diseases were  
49 selected as they represented the majority of patients attending genetic clinics and had an  
50  
51  
52  
53  
54  
55  
56  
57  
58  
59  
60

1  
2  
3 associated available psychosocial literature for review. Databases including Cinahl (1982 to  
4 2006), Medline (1966 to 2006), PsychInfo (1985 to 2006), and Pubmed (1985 to 2006) were  
5 searched as well as hand search of references from major publications. Keywords included:  
6 genetic screening, genetic testing, psychological, psychological well-being, psychological  
7 adjustment, stress, adaptation, cancer worry, disease worry, and distress. Selection criteria for the  
8 literature review included studies with a follow-up design or review articles. Each selected study  
9 was reviewed by two reviewers on its quality of evidence and generalizability using a  
10 standardized template. A total of 73 relevant studies were identified among the disease groups:  
11 49 on cancer, 20 on HD, 2 on Hemochromatosis, and 2 described mixed conditions.  
12  
13  
14  
15  
16  
17  
18  
19  
20  
21  
22  
23  
24

25 Risk factors for psychological distress identified by the literature review provided the  
26 basis for item generation. Items were written in a mixed format where respondents were asked  
27 for their endorsement of each statement ranging from Yes/No for risk factors of binary nature, to  
28 a 5-point likert-type scale for risk factors with stages in frequency and/or intensity. The  
29 instrument items were further refined by 10 genetic service providers (3 geneticists, 4 genetic  
30 counselors, 2 oncologists, 1 genetics nurse) rating items on *comprehension, readability, and*  
31 *perceived clinical relevance* using a ten-point scale with 0 being "excellent/definitely relevant"  
32 and 10 being "very poor/definitely not relevant". Risk factor items were removed if rated above  
33 five by more than 3 providers. Providers were also asked to suggest additional risk factor items.  
34 These suggestions were checked against the literature for empirical evidence. Following this  
35 step, 7 volunteers undergoing genetic testing for AOHDs were recruited to try out the scale for  
36 clarity, succinctness and relevance from the clients' perspectives. At this stage, the proposed  
37 instrument consisted of 56 items: demographics (4 items); perceived risk (8 items); life events  
38 and family history of the disease (8 items); perceived impact of carrying a mutation (9 items);  
39  
40  
41  
42  
43  
44  
45  
46  
47  
48  
49  
50  
51  
52  
53  
54  
55  
56  
57  
58  
59  
60

1  
2  
3 family communication (6 items); disease specific concerns (5 items); optimism (3 items); social  
4 support (3 items), pre-morbid functioning and previous psychiatric history (10 items).  
5  
6  
7  
8  
9

### 10 ***Item refinement:***

11  
12 Subjects: Following informed consent, a convenient sample of 141 participants who had given  
13 blood for genetic tests at the Toronto and Ottawa sites completed the GPRI (using a three  
14 patients per item ratio) to select the best items for the candidate scale. The participants were  
15 middle aged ( $48.67 \pm 13.29$ ), mostly female (77%) testing for hereditary breast cancer, and many  
16 (65%) had already suffered the onset of the illness.  
17  
18  
19  
20  
21  
22  
23

24 Scoring: To ensure that binary items carry an equal weight as the 5-point likert-type  
25 items, a score of 5 was assigned to *Yes* and 1 to *No*. A score of 3 or mean-substitute was assigned  
26 to *Not Applicable* to allow it to be counted in the total score. Reliability analysis was carried out  
27 and a Cronbach's Alpha was set for .75 or higher for the scale to move to the next phase [26].  
28 Any item with an item-total correlation less than .20 was identified for potential removal. Using  
29 team consensus, a total of 19 items were removed, combined or substituted, resulting in a 37  
30 item GPRI candidate scale at the end of phase I.  
31  
32  
33  
34  
35  
36  
37  
38  
39  
40  
41  
42

### 43 **Phase II: Scale Validation**

44  
45 Subjects: Individuals undergoing genetic testing for one of the AOHDs in each of the five study  
46 sites were invited to participate: 1) age 18 or above undergoing genetic testing for cancer, HD, or  
47 Hemochromatosis; 2) fluent in English; and 3) residing within 1.5 hours driving distance from  
48 study site. Although the onset of an AOHD was not an exclusion criterion, individuals in  
49 advanced stages of the illness and / or who were unable to consent due to cognitive impairment  
50  
51  
52  
53  
54  
55  
56  
57  
58  
59  
60

1  
2  
3 were excluded. At baseline, participants were asked to complete a set of self-report  
4  
5 questionnaires (e.g. Brief Symptom Inventory, etc.) described below within a one month period  
6  
7 following the provision of a blood sample. For those who received a genetic test result,  
8  
9 questionnaires were mailed within two weeks to one month of the disclosure of test result. These  
10  
11 participants were also telephoned to complete the Hamilton Depression and Hamilton telephone-  
12  
13 based Anxiety Scales to further assess depressive and anxiety symptoms. .  
14  
15

16  
17 Materials: At baseline, three psychosocial measures were used: GPRI Candidate Scale  
18  
19 from Phase I. To facilitate scoring of the scale by genetic providers, scores for response to each  
20  
21 item on the GPRI were imbedded in the questionnaire, where clinicians could calculate a total  
22  
23 score in less than 5 minutes. Brief Symptom Inventory (BSI) The BSI is a 53-item measure of  
24  
25 psychological distress that contains three global scales i) depression, ii) anxiety and iii)  
26  
27 somatization [27]. While it has some limitations being a self-report measure it has been well-  
28  
29 validated and widely used in medical and psychiatric populations to assess psychological  
30  
31 functioning; Impact of Event Scale (IES): The IES is a 15-item, likert-style scale used to assess  
32  
33 the experience of a specific stress response and is designed to be easily anchored in relation to a  
34  
35 specific stressor or life event. It has been extensively utilized in the genetics literature to assess  
36  
37 genetic testing-related distress; we similarly anchored the IES items in relation to the anticipation  
38  
39 of the genetic test result at baseline and in relation to the actual genetic test at follow- up . The  
40  
41 IES has two sub-scales: i) intrusive thoughts and feelings associated with the stressful life event,  
42  
43 and ii) items associated with patterns of avoidance of certain thoughts, feelings, or situations  
44  
45 [28].  
46  
47  
48  
49  
50  
51

52  
53 Measures at one month post genetic testing results included: the self -reports scales of the  
54  
55 BSI, IES and each participant received a telephone call for the telephone-based Hamilton  
56  
57  
58  
59  
60

1  
2  
3 Depression 29-item Rating Scale (HAM-D) and Hamilton Anxiety Rating Scale (HAM-A). The  
4  
5 HAM-D evaluates depressed mood, vegetative and cognitive symptoms of depression, and  
6  
7 comorbid anxiety symptoms [29]. The HAM-A quantifies the severity of anxiety  
8  
9 symptomatology and consists of 14 items. The HAM-D and HAM-A have demonstrated validity  
10  
11 in clinical interview, in person or by telephone [30]. These two instruments were selected as  
12  
13 main outcome measures based on the literature that the standardized interview based-rating  
14  
15 scales should be used over subjective report scales as the principal outcome criterion in  
16  
17 psychological distress both in general practice and in research trials [34]. Cases would be defined  
18  
19 by established cut-offs from the literature for HAM-D  $\geq 12$  [35] or HAM-A  $\geq 10$  [36]. These  
20  
21 cut off points were established for populations in general practice, which was our study  
22  
23 population.  
24  
25  
26  
27  
28

29 The one-month follow-up time point was selected as it is when elevated distress might  
30  
31 occur [31]. In addition, the 2-week duration criterion for depression defined by the Diagnostic  
32  
33 and Statistical Manual of Mental Disorders, Fourth Edition (DSM-IV) is met by this time frame.  
34  
35  
36  
37  
38

### 39 **Assessing Psychometric Property of the Scale**

40  
41 As a first step, items were required to have at least an 80% response rate. Second, each item was  
42  
43 examined to determine its contribution to the internal consistency of the total 37-item scale. The  
44  
45 minimum item-total correlation was set at .20 [32].  
46  
47

48 A principal components factor analysis with varimax rotation was performed on the  
49  
50 candidate scale to examine the factor structure and the loading of the items. To assess the  
51  
52 *convergent validity* of the candidate scale, the correlations between baseline GPRI, IES and BSI  
53  
54 were calculated. To assess the *sensitivity, specificity and predictive value* of the GPRI, the  
55  
56  
57  
58  
59  
60



1  
2  
3 follow-up HAM-D and HAM-A were used to identify “cases” who met cut offs for either the  
4 depression or anxiety symptomatology. For example, participants with a high GPRI at baseline  
5 would be classified as “at risk” for future onset of adjustment difficulties. This would be  
6 confirmed by a high HAM-D or HAM-A score or “case” during 1 month follow-up. Similarly,  
7 those with a low GPRI score should receive low score in HAM-D or HAM-A as “non-cases”.  
8 The predictive value of the GRPI, describing the number of test-positives (in our case, high  
9 GPRI) who truly have the psychological condition (i.e. cases identified by HAM-D or HAM-A),  
10 was tested by a Receiver Operating Characteristic (ROC) curve which visually plotted the true  
11 positive rate (sensitivity) over false positive rate (1-specificity). We included cases to be  
12 identified by either anxiety and/or depressive symptomatology as both have been reported in the  
13 literature [8, 9].  
14  
15  
16  
17  
18  
19  
20  
21  
22  
23  
24  
25  
26  
27  
28

29 To address the issue of missing follow-up data in a cohort study, as suggested in the  
30 literature [33], we tested the assumption that the sub sample with missing data had a similar  
31 baseline exposure (similar GPRI) as the non-missing subsample by comparing baseline GPRI  
32 between the participants and dropouts. This step assesses if there was systematic bias resulting  
33 from the loss of information in the follow-up period.  
34  
35  
36  
37  
38  
39  
40  
41  
42

## 43 RESULTS

### 44 Participant characteristics

45  
46 Study packages were mailed to 1129 individuals interested in hearing more about the study. Of  
47 these individuals, 722 of them consented and 712 (98%) completed the GPRI. Most participants  
48 were tested for the inheritable cancers, while a small percentage of participants were tested for  
49  
50  
51  
52  
53  
54  
55  
56  
57  
58  
59  
60

1  
2  
3 hemochromatosis and HD. Similar to phase I, phase II participants were mostly female, at mid-  
4  
5 life stage, and more than half had a past diagnosis of the disease (see table 1).  
6  
7

8 **Insert Table 1 about Here**  
9

10 Of the 712 participants, 85 (12%) did not receive genetic testing results at the scheduled  
11 follow-up time and were not eligible for follow-up measures on psychological symptoms in  
12 response to a genetic testing result. Of the remaining 627 participants, 152 (24%) did not return  
13 the self-administered follow-up questionnaires and 12 (2%) submitted the follow-up  
14 questionnaire package but did not complete a standardized telephone interview using HAM-D  
15 and HAM-A (up to 4 telephone calls were made to reach each participant). Therefore the final  
16 number of participants with complete follow-up data is 463 (74%). The age, and baseline GPRI  
17 score between individuals who did not receive genetic testing results (age  $51.4 \pm 12.7$ , GPRI  
18  $49.3 \pm 12.7$ ), those who did not return the follow-up questionnaires (age  $48.1 \pm 11.6$ , GPRI  
19  $50.2 \pm 14.4$ ) and those who completed follow-up measures (age  $50.1 \pm 12.8$ , GPRI  $49.1 \pm 13.5$ ) were  
20 compared. There was no statistically significant group difference (ANOVA and all post-hoc  
21 comparisons  $p > 0.05$ ).  
22  
23  
24  
25  
26  
27  
28  
29  
30  
31  
32  
33  
34  
35  
36  
37

38 Because of the similarity between the dropouts and completers, we proceeded with  
39 reliability and validity analysis of the tool using the subsample that provided outcome data.  
40  
41

42 We carried out the calculations for distress level, for example, for depression and anxiety  
43 symptoms using the BSI data, for specific distress associated a genetic test result using the IES.  
44  
45 Approximately, 13.0% to 20.1% of participants reached the threshold of moderate to severe  
46 distress respectively (see table 2).  
47  
48  
49  
50  
51

52 **Insert Table 2 about Here**  
53  
54  
55  
56  
57  
58  
59  
60

1  
2  
3 HAM-D and HAM-A interview data from 463 participants were used as a further  
4 validation tool to measure psychological symptoms post genetic testing results. Defined by cut-  
5 offs for HAM-D  $\geq 12$  [35] or HAM-A  $\geq 10$  in the literature [36], the rates for psychological  
6 distress of either depression or anxiety was 13.7% (N=63). The rate was 13% for HD, 15% for  
7 breast cancer and 7% for Lynch Syndrome.  
8  
9  
10  
11  
12  
13

### 14 15 16 17 **Reliability and Factor Analysis**

18  
19 A reliability analysis was performed on 37 items. Twenty items belonging to 18 questions were  
20 selected based on the criteria for item selection described in the methods section. The  
21 Cronbach's alpha of the 20 item GPRI was 0.81 suggesting a good level of internal consistency.  
22  
23  
24  
25  
26

27 The factor analysis resulted in a psychometrically sound 3-factor solution, with subscales  
28 representing the dimensions of: 1) *Perceived impact and personal adjustment to genetic testing*  
29 (12 items); 2) *Past history of mental health concerns* (5 items) and 3) *Personal history/family*  
30 *history/loss to cancer* (3 items). All three factors met the minimum Eigenvalue criteria of 1.  
31  
32  
33  
34  
35

36 The first, 12-item factor (ALPHA = 0.85), accounting for 22% of the variance, includes  
37 items associated with the anticipated or experienced impact of being at high risk for AOHD.  
38 Example items included: "My worries about the disease affect my daily mood"; "The disease for  
39 which I am at risk is currently causing a significant disruption in my family life".  
40  
41  
42  
43  
44  
45

46 The second 5-item factor (ALPHA = 0.76), accounted for an additional 14% of the total  
47 variance, and reflected a sense of a person's past history or vulnerability in the area of mental  
48 health, e.g. "I have had emotional problems in the past". These items have been used in other  
49 medical health areas [37, 38] and tend to be predictive of maladjustment [20] following a life  
50 event.  
51  
52  
53  
54  
55  
56  
57  
58  
59  
60

1  
2  
3 The third 3 item factor (ALPHA = 0.08), accounted for 8% of the total variance and  
4 pertained to personal or family-related experiences associated with the heritable disorder for  
5 which the participant is undergoing testing. . Examples include: “I have a personal diagnosis of  
6 the disease for which I am receiving counseling”; “I lost a close family member to the disease for  
7 which I am receiving counseling”; and “I have taken care of a very ill parent or another close  
8 family member”. These 3 final items had low item total correlation because they were different  
9 from the rest of the items in that they focused on direct experiences related to the illness, rather  
10 than psychosocial-related items. These items were kept in the scale as they contributed  
11 significantly to the overall variance, and correlated highly with HAM-D and HAM-A. To  
12 determine the relationships between the three factors/subscales, correlations were computed.  
13 Factor1 and factor2 had moderate correlations with each other (factor1/factor2  $r=0.30$ ,  $p<0.01$ ).  
14 The correlation of the first two factors with factor3 was much lower as expected (factor1/factor3  
15  $r=0.06$ , and factor2/factor3  $r=0.01$ , not statistically significant). These results support the  
16 multidimensional character of the GPRI scale (see Table 3).  
17  
18  
19  
20  
21  
22  
23  
24  
25  
26  
27  
28  
29  
30  
31  
32  
33  
34  
35

36 **Insert Table 3 about Here**  
37

38 One additional statement “I am interested in talking to a counselor about one or more of  
39 these concerns” was added to the tool at the end as suggested by participants and providers to  
40 remind them the option of seeing a counselor if required. This statement is not part of the items  
41 examined during the instrument development and therefore does not carry a score.  
42  
43  
44  
45  
46  
47

48 The total score for the 20 item GPRI ranged from 20 to 100, with a sample mean  
49  $49.36 \pm 13.23$ . The total was calculated by the sum of the raw scores for each of the statements.  
50 Females had a significantly higher score for the GPRI than males ( $50.37 \pm 13.14$  vs.  $41.91 \pm 11.47$ ,  
51  
52  
53  
54  
55  
56  
57  
58  
59  
60

1  
2  
3 p<0.01), and participants testing for HD had a higher, but non-significant score than participants  
4  
5 testing for cancer (52.24±13.24 vs. 49.37±13.22, n.s.).  
6  
7

## 8 9 **Validity**

10  
11 Construct validity – correlations: The GPRI was assessed for its correlation with other  
12  
13 standardized self-report measures of psychological functioning collected at baseline. Convergent  
14  
15 validity was demonstrated by the correlation between the GPRI and the following measures: a  
16  
17 positive correlation with the IES total score at  $r = .51$ ,  $p < .001$ , and with BSI at  $r = .58$ ,  $p < .001$ .  
18  
19

20  
21 Sensitivity, specificity and the predictive value of GPRI for future distress: The telephone  
22  
23 interview-based HAM-D and HAM-A were used to identify subjects who presented specific  
24  
25 psychological symptoms of distress such as depression and/or anxiety during the one month post  
26  
27 genetic testing follow-up. A total of 63 “cases” (13.6% of 463 completers) were identified as  
28  
29 having psychological distress levels above specified thresholds defined in the methods section  
30  
31 for either anxiety or depression symptoms or both. About 23% among participants testing  
32  
33 positive met the distress threshold, as did 10% among those with negative results, and 20%  
34  
35 among uninformative. Participants scoring above HAM-D (N=55) threshold had significantly  
36  
37 higher GPRI scores than participants below the threshold (N=408) (61.12±13.27 vs.  
38  
39 47.91±12.27,  $p < 0.01$ ). Same patterns were observed for HAM-A high (N=40) vs. low (N=423)  
40  
41 (62.53±12.92 vs. 48.25± 12.43,  $p < 0.01$ ).  
42  
43  
44  
45  
46

47  
48 Other demographic characteristics of these 63 subjects include: most were female and  
49  
50 undergoing testing for BRCA1/2, which was similar to the whole sample of 712 (table 1).  
51  
52 Compared with the whole sample, these subjects had a slightly higher percentage of personal  
53  
54 history of cancer (65% vs. 62%), higher rate of recent significant event of loss (56% vs. 47%),  
55  
56 greater percentage reporting disease worries affecting mood (54.8% vs. 27%), having a feeling of  
57  
58  
59  
60

1  
2  
3 sadness in the past month (46% vs. 17%) and anxiousness in the past month (33% vs. 17%). Our  
4 instrument captured all of these characteristics of this subsample.  
5  
6

7  
8 The predictive value of a test describes how many of the test-positives (in this case, a  
9 high score on GPRI) truly have the psychological condition. An ROC curve was used to plot the  
10 true positive rate (sensitivity) over the false positive rate (1-specificity). A good ROC curve rises  
11 sharply, indicating a high proportion in true positive and a low proportion of false positives. The  
12 ROC curve for the GPRI was 0.78, which is considered as an indicator of an adequate screening  
13 instrument [39].  
14  
15  
16  
17  
18  
19  
20  
21

22 An important purpose of the GRPI in our study was to identify individuals at risk for post  
23 genetic testing psychological distress. Therefore, the cutoff value was set to maximize sensitivity  
24 – in another word, not to miss detecting a “case”. Using a GPRI cut off score of 50, the  
25 instrument was able to predict 84% of the “cases” identified by HAM-D or HAM-A conducted  
26 post genetic testing results, with a specificity value of 60% (Figure 1).  
27  
28  
29  
30  
31  
32  
33

34 **Insert Figure 1 about Here**  
35  
36  
37  
38

## 39 **DISCUSSION**

40 The aim of this study was to develop a brief, easy-to-use psychosocial screening instrument  
41 specific for the genetic testing context and to examine its reliability and validity (Appendix A).  
42 To our knowledge this is the first report of a psychosocial screening instrument for use across  
43 AOHD. Unlike current psychological instruments used mainly in research studies in genetics  
44 clinics to identify existing global symptoms of depression and anxiety, or impacts, the GPRI  
45 assesses *psychological risk factors*, such as the specific anticipated impacts of a genetic testing  
46 result and the perception of the disease. The GPRI demonstrates promising psychometric  
47  
48  
49  
50  
51  
52  
53  
54  
55  
56  
57  
58  
59  
60

1  
2  
3 properties as a tool designed to assist genetics health care providers determine which of their  
4  
5 patients undergoing genetic testing for AOHD is at increased psychological risk and should  
6  
7 likely be considered for additional psychosocial support to facilitate adjustment to a test result.  
8  
9

10 A high reliability was demonstrated by a Cronbach's Alpha at 0.81, moderate to high  
11  
12 item-total correlation and inter-item correlation of the whole scale. The construct validity of the  
13  
14 scale was supported by high correlations between the GPRI and standardized psychological  
15  
16 measures (BSI, IES). The clinical utility and predictive value of the GPRI was supported as  
17  
18 well. A GPRI score above the cutoff of 50 at baseline was able to predict 84% of “distress” cases  
19  
20 identified by HAM-D or HAM-A, a strong indicator of its potential usefulness in a clinical  
21  
22 setting.  
23  
24  
25

26  
27 A brief self-administered screening tool will be easy and likely highly acceptable for  
28  
29 incorporation into genetics clinics. The GPRI can be completed and scored quickly during  
30  
31 clinical visits and without additional burden to patients and health providers. In addition, by  
32  
33 focusing specifically on known risk factors associated with inheritable illness, the instrument  
34  
35 will be perceived as being more clinically relevant and acceptable to patients. Patients with  
36  
37 higher GPRI scores can be flagged and either receive telephone follow-up to further assess  
38  
39 concerns or potential distress or be invited back for an appointment for further assessment and  
40  
41 required psychological treatment.  
42  
43  
44

45  
46 Alternatively, genetic clinics with available psychosocial personnel could utilize the tool  
47  
48 to guide referrals for a formal psychosocial assessment that can further explore and address  
49  
50 specific self-reported psychological factors. For example, in the case where an individual is  
51  
52 particularly fearful of developing an illness or is concerned about specific impacts, such as  
53  
54 expecting relationship or family communications difficulties, information on communication  
55  
56  
57  
58  
59  
60

1  
2  
3 strategies, personal coaching or family-based interventions could be employed to support the  
4 individual. For an individuals who reports a past history of psychological illness, a mental health  
5 professional could further assess current psychological functioning and implement specific  
6 approaches, and could offer cognitive-behavioral strategies or psychotropic medication to assist  
7 in the management of anxiety or depressive symptoms [40]. Several items incorporate variables  
8 related to heritable disease experiences and associated perceptions which can be used to guide  
9 educational interventions to correct any myths or beliefs.

10  
11  
12  
13  
14  
15  
16  
17  
18  
19  
20 The scale appeared highly acceptable to patients. A high face validity will contribute to  
21 better scale uptake being perceived as “user friendly” and clinically relevant, compared for  
22 example, to a standardized psychological instrument on depression, which have demonstrated  
23 some barriers to clinic uptake [19]. The GPRI in contrast might be considered as a  
24 “communimetric measure”, that is, the items themselves are useful for the clinician in  
25 communicating concerns about specific areas of functioning directly with the patient [41].  
26  
27  
28  
29  
30  
31  
32  
33

34  
35  
36  
37  
38  
39  
40  
41  
42  
43  
44  
45  
46  
47  
48  
49  
50  
51  
52  
53  
54  
55  
56  
57  
58  
59  
60  
Left untreated, significant levels of psychological symptoms may lead to lower quality  
of life [40], and lower satisfaction with genetics services [21]. A psychological screening  
approach allows both for careful monitoring during a known stressful period-that of awaiting test  
results [42], and provides an opportunity for any planned follow-up care. Flagging those  
individuals who might benefit most from psychosocial care also best utilizes the often limited  
psychological resources in genetic clinics [2, 20, 21].

Our study findings are limited by the characteristics of the sample, in that most  
participants were female and undergoing testing for *BRCA1/2*. This pattern is similar to that  
observed in the literature on genetic testing for AOHD, which is predominantly focused on  
Hereditary Breast-Ovarian Cancer Syndrome. We attempted to obtain a larger sample of



1  
2  
3 individuals undergoing genetic testing for HD or Lynch Syndrome which would presumably  
4 provide a greater sample of males. However, these sample pools were much smaller. However,  
5  
6 this study and the resulting GPRI represent an attempt to begin the development of a general tool  
7  
8 that addresses concerns that are relevant across genetic samples. Our belief stemming from  
9  
10 clinical practice and the associated literature suggest that the identified mental health issues or  
11  
12 adjustment risk factors are not disease specific. We suggest that future studies further address the  
13  
14 validity of GPRI in male populations and in the rare adult onset hereditary diseases, such as HD.  
15  
16 Future studies should also include randomized controlled trials to assess the effectiveness of the  
17  
18 GPRI in predicting distress, its impact on referral patterns, patient and provider satisfaction, as  
19  
20 well as on cost-effectiveness. The GPRI could also be evaluated in primary care settings where  
21  
22 genetics services might be offered more frequently to meet the demand.  
23  
24  
25  
26  
27  
28  
29  
30  
31

## 32 CONCLUSIONS

33  
34 This is the first study to develop a screening tool specifically to help identify individuals  
35  
36 undergoing genetic testing for AOHD who are at increased psychological risk. The study  
37  
38 resulted in an easy to use, 20-item scale consisting of 3 factors with promising psychometric  
39  
40 properties. The GPRI has the potential to be used as a clinical screening tool and as a validated  
41  
42 measure for future studies. Future work can examine its impact on clinical referral patterns  
43  
44 within the field of genetics, and on its acceptability, reliability and validity with larger samples  
45  
46 of individuals undergoing genetic testing for HD, Lynch Syndrome, and potentially for emerging  
47  
48 new genetic tests, such as for cardiac or psychiatric disorders.  
49  
50  
51  
52  
53  
54  
55  
56  
57  
58  
59  
60

## Acknowledgement

The first author is a recipient of a career scientist award from the Canadian Institutes of Health Research (CIHR) and the Ontario Women's Health Council. This study was funded by Canadian Institutes of Health Research (CIHR) Grant No. AHC 73144. We would like to express our gratitude to all the genetic testing patients who participated in our study. Thank you for your contribution towards this very important work and the development of the instrument. Thank you also to the genetic counselors and clinic staff from the participating genetic centers who assisted in recruitment: Children's Hospital of Eastern Ontario (Eastern Ontario Regional Genetics Centre); North York General Hospital (Clinical Genetics); Mount Sinai Hospital (Familial GI Cancer Registry & Familial Breast Cancer Clinic); Princess Margaret Hospital (Familial Breast & Ovarian Cancer Clinic); and BC Cancer Agency (Hereditary Cancer Program). We would also like to thank the research staff for their commitment and hard work to complete this national multi-site study. Finally, the team would like to pay special recognition to the late Dr. Anne Summers, who was co-investigator on the team. Her dedication to the need for empirically based tools and her strong vision to support recipients of new genetic technology were key influences in the conceptualization, funding and completion of this study.

**Ethics:** Research Ethics Board approval was obtained at all five participating sites: Toronto (Mount Sinai Hospital, North York General Hospital, Princess Margaret Hospital); Ottawa (Children's Hospital of Eastern Ontario); and Vancouver (British Columbia Cancer Agency).

**Data Sharing Statement:** There is no additional data available

**Conflict of Interest:** The authors do not have any conflict of interest to disclose.

**Funding:** This study was funded by Canadian Institutes of Health Research (CIHR) Grant No. AHC 73144.

## Contributorship Statements

### Dr. Mary Jane Esplen

Principal Applicant responsible for leading all aspects of the research, oversees budget, hiring staff, supervising data collection, analysis and interpretation, and writing of all manuscripts and reports.

### Dr. Mario Cappelli

Co-principal inv. responsible for assisting in item generation and refinement, the implementation of data collection, interpretation of findings and writing of manuscripts and reports.

### Dr. Jiahui Wong

Co- Applicant responsible assisting in instrument development, statistical procedures, sampling and interpretation of findings and writing of manuscripts and reports.

### Dr. Joan Bottorff

Co-Applicant responsible for refining of items, guiding the recruitment of providers and testing of the instrument in genetic services, development of guidelines and writing of manuscripts and reports.

### Dr. Jon Hunter

Co-Applicant responsible for assisting in item generation and refinement, guideline development, interpretation of findings and writing of manuscripts and reports.

### Dr. June Carroll

Co-Applicant responsible for assisting in item generation and refinement, implementation of the screening validation strategy and development of guidelines, interpretation of findings and writing of manuscripts and reports.

### Dr. Michel Dorval

Co-Applicant responsible for refining of items, guiding the recruitment of providers and testing of the instrument in genetic services, interpretation of findings and writing of manuscripts and reports.

**Dr. Brenda Wilson**

Co-Applicant responsible for co-leading the implementation of the consensus guidelines components of the proposed study. Will assist in item generation for tool, interpretation of findings, writing of manuscripts and reports.

**Dr. Judith Allanson**

Co-Applicant responsible for refining of items, guiding the recruitment of providers/patients and testing of the instrument in genetic services, development of guidelines and writing of manuscripts and reports.

**Ms. Kara Semotiuk**

Co-Applicant responsible for refining of items, guiding the recruitment of providers and testing of the instrument in genetic services and development of guidelines, and writing of manuscripts and reports.

**Ms. Melyssa Aronson**

Co-Applicant responsible for refining of items, guiding the recruitment of providers and testing of the instrument in genetic services, development of guidelines and writing of manuscripts and reports.

**Dr. Louise Bordeleau**

Co-Applicant responsible for overseeing recruitment at MSH and UHN site in Toronto, testing of instrument and interpretation of findings, writing of manuscripts and reports.

**Ms. Nicole Charlemagne**

Project coordinator, responsible for: patient recruitment and follow-up; assisting in item generation, refinement, and overall layout and design of tool; data collection, data entry, and data clean-up; revisions and submission of manuscript.

**Dr. Wendy Meschino**

Co-Applicant responsible for refining of items, guiding the recruitment of providers and testing of the instrument in genetic services, interpretation of findings and writing of manuscripts and reports.

## REFERENCES

1. Lerman C, Croyle RT. Emotional and behavioral responses to genetic testing for susceptibility to cancer. *Oncology (Williston Park)*. 1996;**10**:191-5, 9; discussion 200-2.
2. Bleiker EM, Hahn DE, Aaronson NK. Psychosocial issues in cancer genetics--current status and future directions. *Acta Oncol*. 2003;**42**:276-86.
3. Wellisch DK, Lindberg NM. A psychological profile of depressed and nondepressed women at high risk for breast cancer. *Psychosomatics*. 2001;**42**:330-6.
4. Broadstock M, Michie S, Marteau T. Psychological consequences of predictive genetic testing: a systematic review. *Eur J Hum Genet*. 2000;**8**:731-8.
5. Ho SM, Ho JW, Bonanno GA, et al. Hopefulness predicts resilience after hereditary colorectal cancer genetic testing: a prospective outcome trajectories study. *BMC Cancer*. 2010;**10**:279.
6. Trask PC, Paterson AG, Wang C, et al. Cancer-specific worry interference in women attending a breast and ovarian cancer risk evaluation program: impact on emotional distress and health functioning. *Psychooncology*. 2001;**10**:349-60.
7. Coyne JC, Kruus L, Racioppo M, et al. What do ratings of cancer-specific distress mean among women at high risk of breast and ovarian cancer? *Am J Med Genet A*. 2003;**116A**:222-8.
8. Marteau TM, Croyle RT. The new genetics. Psychological responses to genetic testing. *BMJ*. 1998;**316**:693-6.
9. Meiser B. Psychological impact of genetic testing for cancer susceptibility: an update of the literature. *Psychooncology*. 2005;**14**:1060-74.
10. Hamilton JG, Lobel M, Moyer A. Emotional distress following genetic testing for hereditary breast and ovarian cancer: a meta-analytic review. *Health Psychol*. 2009;**28**:510-8.
11. Shaw C, Abrams K, Marteau TM. Psychological impact of predicting individuals' risks of illness: a systematic review. *Soc Sci Med*. 1999;**49**:1571-98.

12. Dorval M, Gauthier G, Maunsell E, et al. No evidence of false reassurance among women with an inconclusive BRCA1/2 genetic test result. *Cancer Epidemiol Biomarkers Prev.* 2005;**14**:2862-7.
13. Cameron LD, Sherman KA, Marteau TM, et al. Impact of genetic risk information and type of disease on perceived risk, anticipated affect, and expected consequences of genetic tests. *Health Psychol.* 2009;**28**:307-16.
14. Smith KR, West JA, Croyle RT, et al. Familial context of genetic testing for cancer susceptibility: moderating effect of siblings' test results on psychological distress one to two weeks after BRCA1 mutation testing. *Cancer Epidemiol Biomarkers Prev.* 1999;**8**:385-92.
15. Dougall AL, Smith AW, Somers TJ, et al. Coping with genetic testing for breast cancer susceptibility. *Psychosom Med.* 2009;**71**:98-105.
16. Esplen MJ, Urquhart C, Butler K, et al. The experience of loss and anticipation of distress in colorectal cancer patients undergoing genetic testing. *J Psychosom Res.* 2003;**55**:427-35.
17. Zabora JR. Screening procedures for psychological distress. In: Holland JC, editor. *Psycho-Oncology*. New York: Oxford University Press; 1998. p. 653-62.
18. Watson M, Lloyd S, Davidson J, et al. The impact of genetic counselling on risk perception and mental health in women with a family history of breast cancer. *Br J Cancer.* 1999;**79**:868-74.
19. Cella D, Hughes C, Peterman A, et al. A brief assessment of concerns associated with genetic testing for cancer: the Multidimensional Impact of Cancer Risk Assessment (MICRA) questionnaire. *Health Psychol.* 2002;**21**:564-72.
20. Zabora J, BrintzenhofeSzoc K, Curbow B, et al. The prevalence of psychological distress by cancer site. *Psychooncology.* 2001;**10**:19-28.
21. Thewes B, Meiser B, Tucker K, et al. Screening for psychological distress and vulnerability factors in women at increased risk for breast cancer: A review of the literature. *Psychology, Health & Medicine.* 2003;**8**:289-303.
22. Howell D, Keller-Olaman S, Oliver T, et al. A Pan-Canadian Practice Guideline: Screening, Assessment and Care of Psychosocial Distress (Depression, Anxiety) in Adults with

1  
2  
3 Cancer. Toronto: Canadian Partnership Against Cancer (Cancer Journey Action Group) and the  
4 Canadian Association of Psychosocial Oncology 2010.  
5  
6

7  
8 23. Read CY, Perry DJ, Duffy ME. Design and psychometric evaluation of the Psychological  
9 Adaptation to Genetic Information Scale. *J Nurs Scholarsh*. 2005;**37**:203-8.  
10

11  
12 24. Jackson D. A sequential system for personality scale development. In: Spielberger C,  
13 editor. *Current Topics in Clinical and Community Psychology*. New York: Academic Press;  
14 1970. p. 61-96.  
15

16  
17  
18 25. Stuckless N, Goranson R. The vengeance scale: Development of a measure of attitudes  
19 toward revenge. *Journal of Social Behavior and Personality*. 1992;**7**:25-42.  
20

21  
22 26. Briggs SR, Cheek JM. The role of factor analysis in the development and evaluation of  
23 personality scales. *Journal of Personality*. 1986;**54**:106-48.  
24

25  
26  
27 27. Derogatis LR. The brief symptom inventory (BSI). Administration, Scoring and  
28 Procedures Manual. 3rd ed. New York: National Computer Systems; 1993.  
29

30  
31 28. Horowitz MJ, Wilner N, Alvarez W. Impact of Events Scale: A Measure of Subjective  
32 Stress. *Psychosomatic Medicine*. 1979;**41**:209-18.  
33

34  
35  
36 29. Hamilton MA. A rating scale for depression. *Journal of Neurology, Neurosurgery and*  
37 *Psychiatry*. 1960;**23**:56-23.  
38

39  
40 30. Katzelnick DJ, Simon GE, Pearson SD, et al. Randomized trial of a depression  
41 management program in high utilizers of medical care. *Arch Fam Med*. 2000;**9**:345-51.  
42

43  
44 31. DudokdeWit AC, Tibben A, Duivenvoorden HJ, et al. Predicting adaptation to  
45 presymptomatic DNA testing for late onset disorders: who will experience distress? Rotterdam  
46 Leiden Genetics Workgroup. *J Med Genet*. 1998;**35**:745-54.  
47

48  
49 32. Walsh W, Betz N. *Tests and Assessments*. New Jersey: Prentice Hall Inc; 1985.  
50

51  
52  
53 33. Melnick EL, Everitt BS. *Quantitative risk analysis and assessment*. Hebokea NJ: John  
54 Wiley & Sons; 2008.  
55  
56  
57  
58  
59  
60

- 1  
2  
3  
4  
5  
6  
7  
8  
9  
10  
11  
12  
13  
14  
15  
16  
17  
18  
19  
20  
21  
22  
23  
24  
25  
26  
27  
28  
29  
30  
31  
32  
33  
34  
35  
36  
37  
38  
39  
40  
41  
42  
43  
44  
45  
46  
47  
48  
49  
50  
51  
52  
53  
54  
55  
56  
57  
58  
59  
60
34. Moller HJ. Rating depressed patients: observer- vs self-assessment. *Eur Psychiatry*. 2000;**15**:160-72.
35. Aben I, Verhey F, Lousberg R, et al. Validity of the beck depression inventory, hospital anxiety and depression scale, SCL-90, and hamilton depression rating scale as screening instruments for depression in stroke patients. *Psychosomatics*. 2002;**43**:386-93.
36. Pasquini M, Biondi M, Costantini A, et al. Detection and treatment of depressive and anxiety disorders among cancer patients: feasibility and preliminary findings from a liaison service in an oncology division. *Depress Anxiety*. 2006;**23**:441-8.
37. Beck CT. A checklist to identify women at risk for developing postpartum depression. *J Obstet Gynecol Neonatal Nurs*. 1998;**27**:39-46.
38. Reid AJ, Biringer A, Carroll JD, et al. Using the ALPHA form in practice to assess antenatal psychosocial health. Antenatal Psychosocial Health Assessment. *CMAJ*. 1998;**159**:677-84.
39. Goutham R. What is an ROC curve? *The Journal of Family Practice*. 2003;**52**:695.
40. Esplen MJ, Hunter J. Therapy in the Setting of Genetic Predisposition to Cancer' in 'Handbook of Psychotherapy in Cancer Care. In: Watson M, Kissane D, editors. Handbook of Psychotherapy in Cancer Care. London: John Wiley & Sons Ltd; 2011. p. 201-12.
41. Lyons JS. A Communication Theory of Measurement in Human Service Settings. New York: Springer; 2009.
42. Broadstock M, Michie S, Gray J, et al. The psychological consequences of offering mutation searching in the family for those at risk of hereditary breast and ovarian cancer--a pilot study. *Psychooncology*. 2000;**9**:537-48.



**Table 1**  
**Description of Phase II Participants Characteristics (N=712)**

| Variables in GPRI*                                                                                       |                           |                                                 |
|----------------------------------------------------------------------------------------------------------|---------------------------|-------------------------------------------------|
| Age in years: mean (SD)                                                                                  |                           | 49.80 (+12.53),<br>range 18-80,<br>median 50.00 |
| Gender: n (%)                                                                                            | Male                      | 85 (12%)                                        |
|                                                                                                          | Female                    | 627 (88%)                                       |
| Type of AOHD being tested: n (%)                                                                         | Cancer (BRCA)             | 580 (82%)                                       |
|                                                                                                          | Cancer (other, ie, Colon) | 90 (13%)                                        |
|                                                                                                          | Huntington disease        | 31 (4%)                                         |
|                                                                                                          | Hemochromatosis           | 5 (1%)                                          |
| Personal history of disease being tested: n (%)                                                          |                           | 441 (62%)                                       |
| Recent significant event (diagnosis of or loss of significant others to the disease being tested): n (%) |                           | 333 (47%)                                       |
| Disease worries affect daily mood (strongly agree or somewhat agree): n (%)                              |                           | 189 (27%)                                       |
| Sad in the past month (often or almost all the time): n (%)                                              |                           | 121 (17%)                                       |
| Anxious in the past month (often or almost all the time) n (%)                                           |                           | 121 (17%)                                       |

\* Note: there are missing data for some GRPI variables. The total count for each variable do not necessarily add up to 712

**Table 2**  
**Psychological Symptom of Distress 1 Month Post Genetic Testing Results**  
**By Disease Type (N=475)**

|                                                                                                                                                                                                                                                                                                                       | <b>Overall<br/>N (%)</b> | <b>Huntington</b> | <b>BRCA</b> | <b>Other<br/>Cancer</b> |
|-----------------------------------------------------------------------------------------------------------------------------------------------------------------------------------------------------------------------------------------------------------------------------------------------------------------------|--------------------------|-------------------|-------------|-------------------------|
| IES intrusion $\geq 17^a$                                                                                                                                                                                                                                                                                             | 60 (13.0%)               | 5 (23.8%)         | 51 (12.5%)  | 4 (9.5%)                |
| IES avoidance $\geq 17^a$                                                                                                                                                                                                                                                                                             | 65 (13.7%)               | 5 (23.8%)         | 57 (14.0%)  | 3 (7.1%)                |
| BSI-18 total $\geq 13^b$                                                                                                                                                                                                                                                                                              | 95 (20.1%)               | 6 (28.6%)         | 86 (21.1%)  | 3 (7.1%)                |
| <p>a. Shemesh E. et al (2004) Posttraumatic stress, non adherence, and adverse outcome in survivors of a myocardial infarction. <i>Psychosomatic Medicine</i>, 66: 521-526</p> <p>b. Zabora et al (2001): A new psychosocial screening instrument for use with cancer patients. <i>Psychosomatics</i>, 42:241-246</p> |                          |                   |             |                         |

**Table 3**  
**GPRI Factor Solutions and Factor Loadings**

|                                                                                                                                                                                           | Factor Loadings | Communalities | Item-Total | Item Mean |
|-------------------------------------------------------------------------------------------------------------------------------------------------------------------------------------------|-----------------|---------------|------------|-----------|
| • My worries about the disease affect my daily mood                                                                                                                                       | .759            | .652          | .582       | 2.22      |
| • I worry often about my risk of getting the disease                                                                                                                                      | .742            | .551          | .529       | 2.67      |
| • I am concerned about my risk of getting the disease                                                                                                                                     | .656            | .484          | .472       | 3.28      |
| • I have generally felt nervous and anxious in the past month                                                                                                                             | .652            | .538          | .600       | 2.54      |
| • I have generally felt sad in the past month                                                                                                                                             | .627            | .524          | .572       | 2.58      |
| • If I learn that I have a genetic mutation,<br>... I will have more problems in my life                                                                                                  | .617            | .406          | .399       | 2.79      |
| ...I will have difficulties with my family relationships                                                                                                                                  | .513            | .324          | .424       | 1.62      |
| ... I will change plans for my career                                                                                                                                                     | .451            | .228          | .262       | 2.08      |
| • The disease is currently causing a significant disruption in my family life                                                                                                             | .568            | .408          | .463       | 2.42      |
| • I am worried that my test result will impact on my relationship with my significant other                                                                                               | .546            | .308          | .383       | 2.54      |
| • I am worried about talking to my children about the heritable nature of the disease for which I am being tested                                                                         | .522            | .326          | .453       | 2.04      |
| • I feel guilty that I might pass on the disease risk to my children                                                                                                                      | .508            | .276          | .414       | 3.11      |
| Factor 1: Anticipated or experienced impact of having a disease risk or genetic mutation: 12 statements, Cronbach's alpha = .85, inter – item correlation = .32, variance explained = 22% |                 |               |            |           |
| • I have had emotional problems in the past                                                                                                                                               | .796            | .655          | .423       | 2.66      |
| • I have been diagnosed with a depressive or anxiety disorder in the past                                                                                                                 | .769            | .596          | .349       | 2.01      |
| • I have had counselling with a mental health professional in the past                                                                                                                    | .762            | .593          | .433       | 2.85      |
| • I have had emotional problems that led me to thoughts about suicide                                                                                                                     | .623            | .389          | .262       | 1.45      |
| • I am now seeing a counselor for one or more of these emotional concerns                                                                                                                 | .509            | .272          | .274       | 1.35      |
| Factor 2: Personal history or vulnerability to mental health issues or symptoms: 5 items, Cronbach's alpha = .76, inter – item correlation = .39, variance explained = 14%                |                 |               |            |           |
| • I have taken care of a very ill parent or another close family member                                                                                                                   | .687            | .493          | .116       | 2.36      |
| • I lost a close family member (e.g. parent/ sibling) to the disease for which I am receiving counseling/testing                                                                          | .667            | .445          | -.002      | 2.87      |
| • I have/had a personal diagnosis of the disease for which I am receiving counseling/testing                                                                                              | -.642           | .413          | -.073      | 3.47      |
| Factor 3: Personal or family history of the genetic disease being tested in the clinic: 3 items, Cronbach's alpha = .08, inter – item correlation = .03, variance explained = 8%          |                 |               |            |           |

1  
2  
3  
4  
5  
6  
7  
8  
9  
10  
11  
12  
13  
14  
15  
16  
17  
18  
19  
20  
21  
22  
23  
24  
25  
26  
27  
28  
29  
30  
31  
32  
33  
34  
35  
36  
37  
38  
39  
40  
41  
42  
43  
44  
45  
46  
47  
48  
49  
50  
51  
52  
53  
54  
55  
56  
57  
58  
59  
60

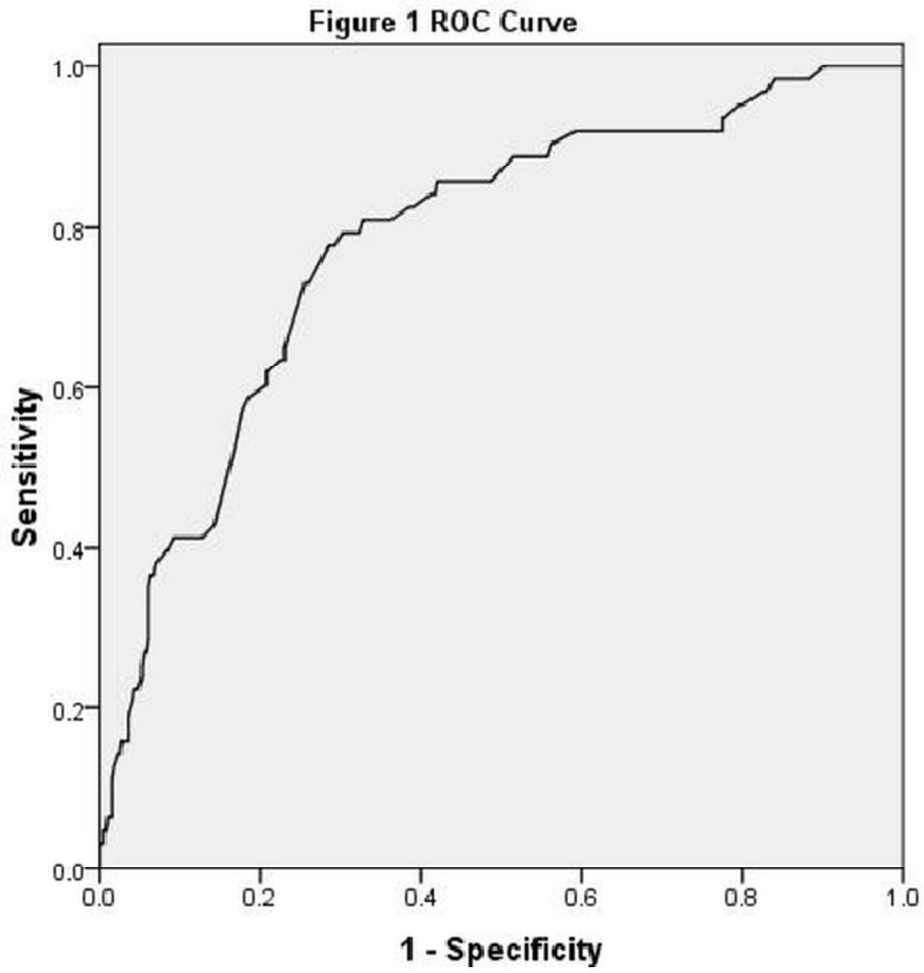

Diagonal segments are produced by ties.

90x98mm (300 x 300 DPI)

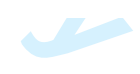

## Appendix A Genetic Psychosocial Risk Instrument (GPRI)

The purpose of this questionnaire is to help identify individuals who may need additional support while going through genetic testing. The questions are about your life experiences and feelings about the disease for which you are receiving genetic testing/counseling. Please note that whenever the word "disease" is used, it is referring to the disease for which you are having genetic testing and/or counseling. Please read each statement carefully, then respond by placing a firm checkmark in the most appropriate space.

Name:

Date (dd / mm / yyyy):

- |                                                                                                                  |           |          |
|------------------------------------------------------------------------------------------------------------------|-----------|----------|
| 1. I have/had a personal diagnosis of the disease for which I am receiving counseling/testing                    | ( 5 ) Yes | ( 1 ) No |
| 2. I have taken care of a very ill parent or another close family member (e.g. sibling)                          | ( 0 ) Yes | ( 1 ) No |
| <u>If yes</u> , the illness was related to the condition for which I am receiving counseling/testing             | ( 5 ) Yes | ( 3 ) No |
| 3. I lost a close family member (e.g. parent/sibling) to the disease for which I am receiving counseling/testing | ( 5 ) Yes | ( 1 ) No |
| <u>If yes</u> , please indicate who the family member was who died (check all that apply):                       |           |          |
| ( 0 ) a parent    ( 0 ) a sibling    ( 0 ) other (specify) _____                                                 |           |          |

|                                                                                                                                    | Strongly agree | Somewhat agree | Neither agree/disagree | Somewhat disagree | Strongly disagree | Not applicable |
|------------------------------------------------------------------------------------------------------------------------------------|----------------|----------------|------------------------|-------------------|-------------------|----------------|
| 4. If I learn that I <u>have</u> a genetic mutation, I believe that:                                                               |                |                |                        |                   |                   |                |
| a. I will have more problems in my life                                                                                            | 5              | 4              | 3                      | 2                 | 1                 | 0              |
| b. I will change plans for my career/ profession                                                                                   | 5              | 4              | 3                      | 2                 | 1                 | 3              |
| c. I will have difficulties in my family relationships                                                                             | 5              | 4              | 3                      | 2                 | 1                 | 3              |
| 5. The disease for which I am at risk is <u>currently</u> causing a significant disruption in my family life                       | 5              | 4              | 3                      | 2                 | 1                 | 3              |
| 6. I am worried that my test result will impact on my relationship with my significant other (or future partner)                   | 5              | 4              | 3                      | 2                 | 1                 | 3              |
| 7. I am worried about talking to my children (young or adult) about the heritable nature of the disease for which I'm being tested | 5              | 4              | 3                      | 2                 | 1                 | 3              |
| 8. My worries about the disease affect my daily mood                                                                               | 5              | 4              | 3                      | 2                 | 1                 | 3              |
| 9. I worry often about my risk of getting the disease                                                                              | 5              | 4              | 3                      | 2                 | 1                 | 3              |
| 10. I am concerned about my risk of getting the disease                                                                            | 5              | 4              | 3                      | 2                 | 1                 | 3              |
| 11. I feel guilty that I might pass on the disease risk to my children                                                             | 5              | 4              | 3                      | 2                 | 1                 | 3              |

|                                                                 | Almost all of the time | Often | Sometimes | Hardly ever | Not at all |
|-----------------------------------------------------------------|------------------------|-------|-----------|-------------|------------|
| 12. I have generally felt sad in the past month                 | 5                      | 4     | 3         | 2           | 1          |
| 13. I have generally felt nervous and anxious in the past month | 5                      | 4     | 3         | 2           | 1          |

- |                                                                                            |           |          |
|--------------------------------------------------------------------------------------------|-----------|----------|
| 14. I have had emotional problems in the past                                              | ( 5 ) Yes | ( 1 ) No |
| 15. I have had counseling with a counselor and/or a mental health professional in the past | ( 5 ) Yes | ( 1 ) No |
| 16. I have been diagnosed with a depressive or anxiety disorder in the past                | ( 5 ) Yes | ( 1 ) No |
| 17. I have had emotional problems that led me to have thoughts about suicide               | ( 5 ) Yes | ( 1 ) No |
| 18. I am now seeing a counselor for one or more of these emotional concerns                | ( 5 ) Yes | ( 1 ) No |

- |                                                                                      |           |          |
|--------------------------------------------------------------------------------------|-----------|----------|
| 19. I am interested in talking with a counsellor about one or more of these concerns | ( 0 ) Yes | ( 0 ) No |
|--------------------------------------------------------------------------------------|-----------|----------|

**Instruction to the user:** Item #19 is for referral purpose only, no score is assigned. The remaining items all have assigned scores. Because item #4 has three sub-statements, a total of 20 statements/items are included in the scoring.

Please sum the score of all items & enter the total score here \_\_\_\_\_. If it is 50 or greater, and if #19 is Yes, then a psychosocial referral is recommended.

**For peer review only - <http://bmjopen.bmj.com/site/about/guidelines.xhtml>**



Supplement: bmjopen-2012-002227.draft_revisions.pdf [file bmjopen-2012-002227.draft_revisions.pdf]
